# Supplementary material for: Using a Sequential Regimen to Eliminate Bacteria at Sublethal Antibiotic Dosages
Source: PLoS Biol. 2015 Apr 8;13(4):e1002104. doi: 10.1371/journal.pbio.1002104 (PMC4390231; doi:10.1371/journal.pbio.1002104)
Supplement: S2 Data — (XLSX) [file pbio.1002104.s002.xlsx]

## Sheet: FigureS1
OD600	CFU per ml
0	21230.7
0	21864.3
0	21952.4
0.0001	87915.7
0.0001	89532.8
0.0001	95738
0.0011	38977.1
0.0011	46086.2
0.0011	48246.2
0.001873	181665
0.00393	164661
0.004193	192544
0.00613	396449
0.008516	386508
0.00879	762596
0.01077	377753
0.014555	637444
0.016446	8.31466e+06
0.018913	8.70749e+06
0.019753	9.30108e+06
0.022469	659799
0.029902	1.83153e+07
0.030804	1.8445e+07
0.031999	1.97492e+07
0.050629	3.46562e+07
0.053027	3.68739e+07
0.05335	3.81989e+07
0.087396	7.94353e+07
0.094421	6.58929e+07
0.099156	7.47325e+07

## Sheet: FigureS2a
[DOX]	Replicate	OD600
0	1	0.088
0	2	0.095
0	3	0.1
0	4	0.101
0	5	0.107
0	6	0.097
0.01	1	0.103
0.01	2	0.107
0.01	3	0.102
0.01	4	0.097
0.01	5	0.109
0.01	6	0.103
0.06	1	0.016
0.06	2	0.014
0.06	3	0.015
0.06	4	0.032
0.06	5	0.025
0.06	6	0.029
0.07	1	0.01
0.07	2	0.024
0.07	3	0.011
0.07	4	0.026
0.07	5	0.007
0.07	6	0.021
0.08	1	0.017
0.08	2	0.015
0.08	3	0.006
0.08	4	0.022
0.08	5	0.014
0.08	6	0.016
0.09	1	0.02
0.09	2	0.012
0.09	3	0.022
0.09	4	0.013
0.09	5	0.021
0.09	6	0.008
0.15	1	0.014
0.15	2	0.015
0.15	3	0.014
0.15	4	0.011
0.15	5	0.013
0.15	6	0.004
0.015	1	0.113
0.015	2	0.094
0.015	3	0.097
0.015	4	0.105
0.015	5	0.106
0.015	6	0.099
0.02	1	0.096
0.02	2	0.097
0.02	3	0.099
0.02	4	0.101
0.02	5	0.091
0.02	6	0.094
0.025	1	0.09
0.025	2	0.09
0.025	3	0.085
0.025	4	0.082
0.025	5	0.076
0.025	6	0.075
0.03	1	0.075
0.03	2	0.076
0.03	3	0.074
0.03	4	0.059
0.03	5	0.057
0.03	6	0.061
0.035	1	0.067
0.035	2	0.065
0.035	3	0.056
0.035	4	0.052
0.035	5	0.061
0.035	6	0.054
0.04	1	0.046
0.04	2	0.053
0.04	3	0.047
0.04	4	0.046
0.04	5	0.043
0.04	6	0.044
0.045	1	0.044
0.045	2	0.037
0.045	3	0.043
0.045	4	0.048
0.045	5	0.046
0.045	6	0.038
0.05	1	0.023
0.05	2	0.022
0.05	3	0.022
0.05	4	0.035
0.05	5	0.033
0.05	6	0.032

## Sheet: FigureS2b
[ERY]	Replicate	OD600
0	1	0.151
0	2	0.153
0	3	0.152
0	4	0.15
0	5	0.147
0	6	0.144
2	1	0.129
2	2	0.131
2	3	0.141
2	4	0.14
2	5	0.133
2	6	0.141
12	1	0.022
12	2	0.008
12	3	0.017
12	4	0.015
12	5	0.01
12	6	0.007
13	1	0.007
13	2	0.023
13	3	0.001
13	4	0.016
13	5	0.012
13	6	0.013
14	1	0.009
14	2	0.007
14	3	0.003
14	4	0.01
14	5	-0.006
14	6	0.012
15	1	0.013
15	2	0.003
15	3	0.006
15	4	0.011
15	5	0.011
15	6	-0.004
20	1	0.008
20	2	0.015
20	3	0
20	4	0.009
20	5	-0.006
20	6	0.011
4	1	0.133
4	2	0.121
4	3	0.131
4	4	0.119
4	5	0.133
4	6	0.14
5	1	0.109
5	2	0.119
5	3	0.139
5	4	0.12
5	5	0.126
5	6	0.102
6	1	0.078
6	2	0.092
6	3	0.094
6	4	0.064
6	5	0.079
6	6	0.082
7	1	0.069
7	2	0.053
7	3	0.055
7	4	0.043
7	5	0.043
7	6	0.053
8	1	0.088
8	2	0.067
8	3	0.055
8	4	0.028
8	5	0.03
8	6	0.056
9	1	0.029
9	2	0.031
9	3	0.028
9	4	0.028
9	5	0.025
9	6	0.03
10	1	0.024
10	2	0.018
10	3	0.017
10	4	0.018
10	5	0.027
10	6	0.014
11	1	0.011
11	2	0.016
11	3	0.02
11	4	0.019
11	5	0.019
11	6	0.02

## Sheet: FigureS3
Time	Replicate	DOX-only	25-75	50-50 combo	75-25	ERY-only
12.1h	replicate 1	0.01541	0.00191	0.00041	0.00751	0.04821
12.1h	replicate 2	0.01901	-0.00169	0.00741	0.00741	0.04381
12.1h	replicate 3	0.01961	0.00121	0.00891	0.00471	0.02961
12.1h	replicate 4	0.03071	-0.00029	0.00431	0.00341	0.04281
12.1h	replicate 5	0.02081	0.00211	0.00261	0.02161	0.04561
12.1h	replicate 6	0.02121	0.00031	0.01351	0.01101	0.04341
24h	replicate 1	0.08711	0.05201	0.06061	0.06341	0.13011
24h	replicate 2	0.08961	0.01831	0.03581	0.05151	0.11911
24h	replicate 3	0.08631	0.02091	0.09791	0.05991	0.11151
24h	replicate 4	0.09991	0.02061	0.03141	0.06951	0.13031
24h	replicate 5	0.05031	0.02221	0.05501	0.06541	0.12781
24h	replicate 6	0.07501	0.00721	0.03541	0.04701	0.13641

## Sheet: FigureS4a
[DOX]	Replicate	OD600
0	1	0.32
0	2	0.298
0	3	0.32
0	4	0.316
0.02	1	0.315
0.02	2	0.331
0.02	3	0.334
0.02	4	0.33
0.04	1	0.269
0.04	2	0.349
0.04	3	0.293
0.04	4	0.272
0.06	1	0.28
0.06	2	0.287
0.06	3	0.288
0.06	4	0.308
0.07	1	0.278
0.07	2	0.266
0.07	3	0.258
0.07	4	0.259
0.09	1	0.205
0.09	2	0.226
0.09	3	0.233
0.09	4	0.217
0.1	1	0.196
0.1	2	0.163
0.1	3	0.118
0.1	4	0.145
0.11	1	0.161
0.11	2	0.11
0.11	3	0.111
0.11	4	0.117
0.12	1	0.118
0.12	2	0.091
0.12	3	0.082
0.12	4	0.085
0.15	1	0.051
0.15	2	0.05
0.15	3	0.037
0.15	4	0.048
0.18	1	0.029
0.18	2	0.04
0.18	3	0.037
0.18	4	0.038
0.2	1	0
0.2	2	0.001

## Sheet: FigureS4b
[ERY]	Replicate	OD600
0	1	0.32
0	2	0.298
0	3	0.32
0	4	0.316
0.5	1	0.299
0.5	2	0.295
0.5	3	0.279
0.5	4	0.276
1	1	0.304
1	2	0.258
1	3	0.258
1	4	0.255
1.5	1	0.136
1.5	2	0.127
1.5	3	0.124
1.5	4	0.122
2	1	0.118
2	2	0.128
2	3	0.127
2	4	0.125
2.5	1	0.07
2.5	2	0.068
2.5	3	0.074
2.5	4	0.066
3	1	0.095
3	2	0.064
3	3	0.045
3	4	0.043
4	1	0.025
4	2	0.023
4	3	0.018
4	4	0.021
6	1	0.015
6	2	0.02
6	3	0.02
6	4	0.009
8	1	0.003
8	2	0.002
8	3	0.012
8	4	0.002
10	1	0.003
10	2	0.005
10	3	0.008
10	4	0.001
14	1	0.002
14	2	0.004
14	3	0.004
14	4	0.018

## Sheet: FigureS7
Treatment	Replicate	0	0.333333	0.666667	1	1.33333	1.66667	2	2.33333	2.66667	3	3.33333	3.66667	4	4.33333	4.66667	5	5.33333	5.66667	6	6.33333	6.66667	7	7.33333	7.66667	8	8.33333	8.66667	9	9.33333	9.66667	10	10.3333	10.6667	11	11.3333	11.6667	12	12.3333	12.6667	13	13.3333	13.6667	14	14.3333	14.6667	15	15.3333	15.6667
CONTROL	1	0.001625	0.001625	0.001625	0.000875	0.00075	0.00075	0.000875	0.001	0.000125	0.00025	2.7756e-17	0.000875	0.000875	0.00075	0.001	0.001875	0.002875	0.002875	0.004	0.005	0.007	0.009125	0.010875	0.014	0.016375	0.019375	0.022375	0.025625	0.028125	0.031375	0.035	0.03825	0.0415	0.0465	0.0515	0.0585	0.0665	-0.002125	-0.002125	-0.002	-0.00175	-0.002875	-0.0025	-0.002	-0.001125	-0.001125	-0.000125	-0.000125
CONTROL	2	0.003625	0.003625	0.003625	0.003875	0.00375	0.00375	0.003875	0.004	0.004125	0.00425	0.004	0.004875	0.004875	0.00475	0.006	0.005875	0.006875	0.007875	0.009	0.01	0.012	0.014125	0.015875	0.019	0.022375	0.025375	0.028375	0.031625	0.034125	0.038375	0.041	0.04425	0.0485	0.0535	0.0595	0.0665	0.0735	-0.002125	-0.002125	-0.002	-0.00175	-0.001875	-0.0015	1.3878e-17	-0.000125	-0.000125	-0.000125	-0.000125
CONTROL	3	0.003625	0.003625	0.003625	0.003875	0.00375	0.00375	0.003875	0.004	0.004125	0.00425	0.004	0.003875	0.003875	0.00475	0.005	0.005875	0.005875	0.006875	0.008	0.01	0.011	0.014125	0.015875	0.019	0.022375	0.025375	0.028375	0.031625	0.035125	0.038375	0.041	0.04525	0.0495	0.0565	0.0615	0.0695	0.0765	-0.000125	-0.000125	0.001	0.00025	0.000125	0.0015	0.002	0.000875	0.001875	0.000875	0.000875
CONTROL	4	0.001625	0.001625	0.001625	0.002875	0.00175	0.00175	0.002875	0.002	0.002125	0.00225	0.003	0.002875	0.002875	0.00275	0.003	0.003875	0.003875	0.004875	0.006	0.007	0.008	0.010125	0.011875	0.014	0.016375	0.019375	0.022375	0.025625	0.029125	0.032375	0.035	0.03825	0.0415	0.0455	0.0505	0.0555	0.0615	-0.001125	-0.001125	-0.001	-0.00075	-0.000875	-0.0005	-0.001	-0.000125	-0.000125	-0.000125	0.000875
CONTROL	5	0.002625	0.002625	0.002625	0.002875	0.00275	0.00375	0.002875	0.004	0.004125	0.00425	0.004	0.003875	0.003875	0.00475	0.005	0.005875	0.005875	0.006875	0.008	0.009	0.011	0.013125	0.015875	0.018	0.021375	0.024375	0.028375	0.031625	0.034125	0.037375	0.04	0.04425	0.0475	0.0525	0.0575	0.0635	0.0715	-0.000125	-0.000125	1.3878e-17	0.00125	0.000125	0.0005	0.001	0.001875	0.000875	0.001875	0.002875
CONTROL	6	0.002625	0.002625	0.002625	0.002875	0.00275	0.00275	0.002875	0.003	0.003125	0.00325	0.004	0.003875	0.003875	0.00375	0.004	0.004875	0.004875	0.005875	0.007	0.009	0.01	0.012125	0.013875	0.017	0.019375	0.022375	0.026375	0.029625	0.033125	0.036375	0.039	0.04225	0.0465	0.0505	0.0555	0.0625	0.0705	-0.000125	-0.000125	1.3878e-17	0.00025	0.000125	0.0005	2.7756e-17	0.000875	0.000875	0.000875	0.001875
CONTROL	7	0.003625	0.003625	0.003625	0.003875	0.00375	0.00375	0.003875	0.004	0.003125	0.00425	0.003	0.002875	0.003875	0.00375	0.004	0.003875	0.004875	0.005875	0.007	0.008	0.01	0.012125	0.013875	0.017	0.020375	0.023375	0.027375	0.030625	0.032125	0.035375	0.039	0.04225	0.0465	0.0515	0.0565	0.0635	0.0715	-0.001125	-0.001125	-0.001	-0.00075	-0.000875	-0.0005	2.7756e-17	0.000875	0.000875	0.000875	0.000875
DDDDDDDD	1	0.002625	0.002625	0.002625	0.002875	0.00275	0.00275	0.002875	0.003	0.003125	0.00325	0.003	0.002875	0.003875	0.00375	0.004	0.003875	0.004875	0.004875	0.005	0.005	0.006	0.006125	0.006875	0.008	0.008375	0.009375	0.009375	0.010625	0.012125	0.013375	0.014	0.01625	0.0175	0.0195	0.0215	0.0235	0.0265	-0.001125	-0.001125	-0.001	-0.00075	-0.000875	-0.0005	1.3878e-17	-0.000125	-0.000125	-0.000125	-0.000125
DDDDDDDD	2	0.003625	0.003625	0.003625	0.003875	0.00375	0.00375	0.003875	0.004	0.004125	0.00325	0.004	0.003875	0.003875	0.00375	0.004	0.004875	0.004875	0.004875	0.005	0.006	0.006	0.006125	0.006875	0.007	0.008375	0.009375	0.009375	0.010625	0.011125	0.012375	0.013	0.01525	0.0165	0.0185	0.0205	0.0225	0.0245	-0.000125	-0.000125	-0.002	-0.00175	-0.001875	-0.0015	-0.001	-0.001125	-0.001125	-0.001125	-0.001125
DDDDDDDD	3	0.003625	0.003625	0.003625	0.003875	0.00275	0.00275	0.002875	0.003	0.003125	0.00325	0.004	0.003875	0.003875	0.00375	0.004	0.004875	0.004875	0.004875	0.005	0.005	0.005	0.006125	0.005875	0.006	0.006375	0.007375	0.007375	0.008625	0.009125	0.010375	0.011	0.01125	0.0125	0.0135	0.0155	0.0165	0.0185	-0.002125	-0.002125	-0.003	-0.00275	-0.002875	-0.0015	-0.002	-0.002125	-0.003125	-0.003125	-0.002125
DDDDDDDD	4	0.002625	0.002625	0.002625	0.002875	0.00275	0.00275	0.002875	0.003	0.003125	0.00325	0.003	0.002875	0.002875	0.00275	0.003	0.003875	0.003875	0.003875	0.004	0.004	0.004	0.005125	0.004875	0.006	0.006375	0.006375	0.007375	0.007625	0.008125	0.009375	0.01	0.01125	0.0125	0.0135	0.0145	0.0165	0.0175	-0.001125	-0.001125	-0.001	-0.00075	-0.000875	-0.0005	1.3878e-17	-0.000125	-0.000125	-0.000125	-0.000125
DDDDDDDD	5	0.002625	0.002625	0.002625	0.002875	0.00275	0.00275	0.002875	0.003	0.003125	0.00325	0.003	0.003875	0.003875	0.00375	0.004	0.003875	0.004875	0.004875	0.005	0.005	0.006	0.006125	0.005875	0.007	0.007375	0.008375	0.008375	0.009625	0.010125	0.011375	0.013	0.01425	0.0155	0.0175	0.0185	0.0205	0.0225	0.000875	0.000875	0.001	0.00225	0.000125	0.0005	0.001	0.000875	0.000875	0.001875	0.001875
DDDDDDDD	6	0.003625	0.003625	0.003625	0.003875	0.00375	0.00375	0.003875	0.003	0.004125	0.00325	0.004	0.004875	0.003875	0.00375	0.004	0.004875	0.005875	0.005875	0.006	0.005	0.007	0.006125	0.006875	0.007	0.007375	0.008375	0.008375	0.009625	0.010125	0.011375	0.012	0.01325	0.0145	0.0155	0.0175	0.0195	0.0215	-0.003125	-0.003125	-0.003	-0.00175	-0.002875	-0.0025	-0.002	-0.003125	-0.003125	-0.003125	-0.003125
DDDDDDDD	7	0.003625	0.003625	0.003625	0.003875	0.00275	0.00275	0.002875	0.004	0.004125	0.00425	0.004	0.003875	0.003875	0.00375	0.004	0.003875	0.004875	0.004875	0.005	0.005	0.005	0.006125	0.005875	0.006	0.007375	0.007375	0.008375	0.008625	0.009125	0.010375	0.011	0.01225	0.0135	0.0145	0.0155	0.0175	0.0185	-0.002125	-0.002125	-0.002	-0.00175	-0.001875	-0.0025	-0.002	-0.002125	-0.001125	-0.002125	-0.002125
DDDDDDDD	8	0.001625	0.001625	0.001625	0.001875	0.00175	0.00175	0.001875	0.002	0.002125	0.00325	0.003	0.002875	0.002875	0.00275	0.003	0.003875	0.003875	0.003875	0.004	0.005	0.006	0.006125	0.005875	0.007	0.007375	0.008375	0.009375	0.010625	0.011125	0.012375	0.014	0.01525	0.0175	0.0185	0.0215	0.0235	0.0265	-0.000125	-0.000125	1.3878e-17	-0.00075	0.000125	0.0005	0.001	0.000875	0.000875	0.000875	0.000875
CCCCCCCC	1	0.002625	0.002625	0.002625	0.002875	0.00275	0.00275	0.002875	0.003	0.003125	0.00325	0.003	0.002875	0.002875	0.00275	0.003	0.002875	0.002875	0.002875	0.004	0.003	0.004	0.004125	0.003875	0.005	0.005375	0.005375	0.005375	0.005625	0.006125	0.006375	0.007	0.00725	0.0085	0.0085	0.0095	0.0095	0.0105	-0.002125	-0.002125	-0.002	-0.00175	-0.001875	-0.0015	-0.002	-0.002125	-0.002125	-0.002125	-0.002125
CCCCCCCC	2	0.003625	0.003625	0.003625	0.003875	0.00375	0.00375	0.003875	0.003	0.004125	0.00325	0.004	0.003875	0.003875	0.00375	0.004	0.003875	0.003875	0.003875	0.005	0.005	0.005	0.005125	0.004875	0.006	0.006375	0.006375	0.006375	0.006625	0.007125	0.007375	0.008	0.00825	0.0085	0.0095	0.0095	0.0105	0.0105	-0.000125	-0.000125	1.3878e-17	0.00025	0.000125	-0.0005	1.3878e-17	-0.000125	-0.000125	-0.000125	-0.000125
CCCCCCCC	3	0.002625	0.002625	0.002625	0.002875	0.00275	0.00275	0.002875	0.003	0.003125	0.00325	0.004	0.003875	0.003875	0.00375	0.004	0.003875	0.003875	0.004875	0.005	0.005	0.005	0.005125	0.005875	0.006	0.005375	0.006375	0.006375	0.006625	0.007125	0.008375	0.008	0.00825	0.0085	0.0095	0.0095	0.0105	0.0105	-0.003125	-0.003125	-0.003	-0.00275	-0.002875	-0.0025	-0.003	-0.003125	-0.003125	-0.003125	-0.003125
CCCCCCCC	4	0.003625	0.003625	0.003625	0.003875	0.00375	0.00375	0.003875	0.004	0.004125	0.00425	0.004	0.003875	0.003875	0.00375	0.004	0.003875	0.003875	0.004875	0.005	0.005	0.005	0.006125	0.005875	0.006	0.007375	0.009375	0.009375	0.010625	0.010125	0.010375	0.011	0.01125	0.0125	0.0135	0.0135	0.0145	0.0145	-0.002125	-0.002125	-0.002	-0.00275	-0.002875	-0.0025	-0.002	-0.002125	-0.002125	-0.002125	-0.002125
CCCCCCCC	5	0.002625	0.002625	0.002625	0.002875	0.00275	0.00275	0.002875	0.004	0.004125	0.00425	0.004	0.003875	0.003875	0.00375	0.004	0.004875	0.004875	0.004875	0.006	0.006	0.006	0.007125	0.006875	0.008	0.008375	0.009375	0.009375	0.010625	0.010125	0.011375	0.012	0.01325	0.0135	0.0145	0.0155	0.0165	0.0175	-0.000125	-0.000125	-0.001	0.00025	-0.000875	-0.0005	1.3878e-17	-0.000125	-0.000125	-0.000125	-0.000125
CCCCCCCC	6	0.003625	0.003625	0.003625	0.003875	0.00375	0.00375	0.003875	0.004	0.004125	0.00425	0.004	0.003875	0.003875	0.00375	0.004	0.003875	0.003875	0.003875	0.004	0.005	0.005	0.005125	0.004875	0.006	0.006375	0.006375	0.006375	0.006625	0.006125	0.007375	0.007	0.00825	0.0085	0.0085	0.0095	0.0095	0.0095	-0.000125	-0.000125	-0.001	-0.00075	0.000125	0.0005	1.3878e-17	-0.000125	0.000875	0.000875	0.000875
CCCCCCCC	7	0.003625	0.003625	0.003625	0.003875	0.00375	0.00375	0.003875	0.003	0.004125	0.00325	0.004	0.003875	0.003875	0.00375	0.004	0.003875	0.003875	0.004875	0.005	0.006	0.006	0.006125	0.006875	0.007	0.007375	0.008375	0.008375	0.008625	0.009125	0.009375	0.01	0.01025	0.0115	0.0115	0.0125	0.0125	0.0135	-0.001125	-0.001125	-0.001	-0.00175	-0.001875	0.0045	-0.001	-0.001125	-0.000125	-0.001125	-0.001125
CCCCCCCC	8	0.000625	0.000625	0.000625	0.000875	0.00075	0.00075	-0.000125	0.001	0.001125	0.00025	0.001	0.000875	0.000875	-0.00025	0.001	0.000875	0.001875	0.001875	0.002	0.002	0.003	0.003125	0.002875	0.004	0.004375	0.004375	0.004375	0.005625	0.006125	0.006375	0.007	0.00725	0.0085	0.0085	0.0095	0.0105	0.0115	-0.000125	-0.000125	1.3878e-17	0.00025	0.000125	0.0005	1.3878e-17	0.000875	0.000875	0.000875	0.000875
EEEEEEEE	1	0.002625	0.002625	0.002625	0.002875	0.00275	0.00175	0.002875	0.003	0.003125	0.00225	0.002	0.001875	0.001875	0.00275	0.003	0.002875	0.001875	0.001875	0.003	0.003	0.003	0.005125	0.004875	0.006	0.006375	0.008375	0.009375	0.010625	0.011125	0.012375	0.014	0.01625	0.0185	0.0195	0.0215	0.0235	0.0255	-0.001125	-0.001125	-0.001	-0.00075	-0.000875	-0.0005	-0.001	-0.001125	-0.000125	-0.000125	-0.000125
EEEEEEEE	2	0.003625	0.003625	0.003625	0.003875	0.00275	0.00375	0.002875	0.003	0.003125	0.00325	0.004	0.002875	0.003875	0.00375	0.004	0.003875	0.004875	0.004875	0.005	0.005	0.006	0.006125	0.006875	0.008	0.009375	0.010375	0.012375	0.013625	0.014125	0.016375	0.018	0.01925	0.0215	0.0245	0.0255	0.0285	0.0295	-0.000125	-0.000125	1.3878e-17	-0.00075	0.000125	0.0005	0.001	0.000875	0.000875	0.000875	0.000875
EEEEEEEE	3	0.003625	0.003625	0.003625	0.004875	0.00475	0.00475	0.004875	0.005	0.005125	0.00525	0.005	0.004875	0.004875	0.00575	0.006	0.005875	0.005875	0.006875	0.007	0.008	0.009	0.010125	0.010875	0.012	0.013375	0.014375	0.016375	0.018625	0.019125	0.021375	0.024	0.02625	0.0285	0.0305	0.0325	0.0355	0.0375	-0.002125	-0.002125	-0.002	-0.00175	-0.001875	-0.0015	-0.002	-0.001125	-0.001125	-0.001125	-0.001125
EEEEEEEE	4	0.003625	0.003625	0.003625	0.003875	0.00375	0.00375	0.002875	0.003	0.003125	0.00325	0.004	0.003875	0.003875	0.00375	0.005	0.004875	0.004875	0.004875	0.006	0.006	0.007	0.008125	0.007875	0.009	0.010375	0.011375	0.013375	0.014625	0.016125	0.018375	0.02	0.02125	0.0235	0.0255	0.0275	0.0295	0.0325	-0.001125	-0.001125	-0.001	-0.00075	-0.000875	-0.0005	-0.001	-0.000125	-0.000125	-0.000125	-0.000125
EEEEEEEE	5	0.003625	0.003625	0.003625	0.003875	0.00375	0.00375	0.003875	0.004	0.004125	0.00425	0.004	0.003875	0.003875	0.00375	0.004	0.004875	0.004875	0.004875	0.005	0.005	0.006	0.006125	0.006875	0.008	0.009375	0.009375	0.011375	0.012625	0.013125	0.014375	0.016	0.01825	0.0205	0.0215	0.0235	0.0255	0.0275	-0.002125	-0.002125	-0.002	-0.00175	-0.001875	-0.0015	-0.001	0.000875	-0.000125	-0.000125	-0.000125
EEEEEEEE	6	0.001625	0.001625	0.001625	0.001875	0.00175	0.00175	0.001875	0.002	0.002125	0.00225	0.001	0.001875	0.001875	0.00175	0.002	0.001875	0.002875	0.002875	0.004	0.004	0.005	0.006125	0.006875	0.008	0.010375	0.011375	0.013375	0.014625	0.015125	0.017375	0.019	0.02125	0.0235	0.0255	0.0285	0.0305	0.0325	-0.000125	-0.000125	1.3878e-17	0.00025	0.000125	0.0005	0.001	0.000875	0.000875	0.000875	0.000875
EEEEEEEE	7	0.003625	0.003625	0.003625	0.003875	0.00375	0.00375	0.003875	0.004	0.004125	0.00325	0.004	0.003875	0.003875	0.00475	0.005	0.004875	0.004875	0.005875	0.006	0.007	0.008	0.009125	0.009875	0.011	0.012375	0.013375	0.015375	0.016625	0.018125	0.020375	0.022	0.02425	0.0265	0.0295	0.0315	0.0335	0.0355	-0.001125	-0.001125	-0.001	0.00025	0.000125	0.0005	0.001	0.000875	0.000875	0.000875	0.000875
DEDEDEDE	1	0.002625	0.002625	0.002625	0.001875	0.00175	0.00175	0.001875	0.002	0.002125	0.00225	0.002	0.001875	0.001875	0.00175	0.002	0.001875	0.001875	0.002875	0.002	0.003	0.003	0.003125	0.002875	0.004	0.004375	0.004375	0.005375	0.005625	0.006125	0.007375	0.007	0.00825	0.0095	0.0105	0.0125	0.0135	0.0155	0.000875	0.000875	1.3878e-17	0.00025	0.001125	0.0015	0.002	0.001875	0.001875	0.000875	0.001875
DEDEDEDE	2	0.003625	0.003625	0.003625	0.003875	0.00375	0.00375	0.003875	0.003	0.003125	0.00325	0.003	0.003875	0.003875	0.00375	0.005	0.004875	0.004875	0.004875	0.006	0.006	0.007	0.007125	0.007875	0.008	0.009375	0.010375	0.011375	0.011625	0.012125	0.014375	0.015	0.01725	0.0195	0.0205	0.0225	0.0255	0.0285	-0.000125	-0.000125	0.003	0.00225	0.001125	0.0005	0.001	0.000875	-0.000125	0.001875	0.001875
DEDEDEDE	3	0.003625	0.003625	0.003625	0.003875	0.00375	0.00375	0.003875	0.004	0.004125	0.00425	0.004	0.003875	0.004875	0.00475	0.005	0.004875	0.004875	0.005875	0.006	0.006	0.007	0.007125	0.006875	0.008	0.009375	0.009375	0.010375	0.011625	0.012125	0.013375	0.014	0.01625	0.0175	0.0195	0.0215	0.0235	0.0255	0.009875	0.009875	0.012	0.00625	0.008125	0.0015	0.002	0.008875	0.003875	0.001875	0.001875
DEDEDEDE	4	0.003625	0.003625	0.003625	0.003875	0.00375	0.00375	0.004875	0.004	0.004125	0.00425	0.005	0.004875	0.004875	0.00475	0.005	0.004875	0.005875	0.005875	0.007	0.007	0.007	0.007125	0.007875	0.008	0.009375	0.009375	0.010375	0.010625	0.012125	0.012375	0.014	0.01525	0.0165	0.0175	0.0195	0.0215	0.0235	-0.000125	-0.000125	1.3878e-17	0.00125	0.000125	0.0005	0.001	0.000875	0.000875	0.001875	0.001875
DEDEDEDE	5	0.001625	0.001625	0.001625	0.001875	0.00175	0.00075	0.000875	0.002	0.002125	0.00225	0.002	0.001875	0.001875	0.00175	0.003	0.001875	0.002875	0.002875	0.003	0.004	0.004	0.005125	0.005875	0.006	0.007375	0.007375	0.009375	0.009625	0.011125	0.012375	0.013	0.01425	0.0165	0.0185	0.0195	0.0225	0.0255	-0.001125	-0.001125	-0.001	0.00025	-0.000875	0.0005	1.3878e-17	0.000875	-0.000125	-0.000125	-0.000125
DEDEDEDE	6	0.005625	0.005625	0.005625	0.003875	0.00275	0.00375	0.003875	0.002	0.001125	0.00125	0.002	0.002875	0.002875	0.00175	0.003	0.002875	0.004875	0.004875	0.005	0.006	0.006	0.006125	0.006875	0.008	0.009375	0.010375	0.010375	0.012625	0.013125	0.014375	0.016	0.01825	0.0205	0.0225	0.0245	0.0275	0.0305	-0.001125	-0.001125	-0.001	0.00025	-0.000875	-0.0005	1.3878e-17	-0.001125	-0.000125	-0.001125	-0.000125
DEDEDEDE	7	0.002625	0.002625	0.002625	0.002875	0.00275	0.00275	0.002875	0.003	0.002125	0.00325	0.003	0.002875	0.003875	0.00275	0.004	0.003875	0.004875	0.004875	0.005	0.005	0.006	0.006125	0.005875	0.007	0.008375	0.008375	0.009375	0.011625	0.011125	0.012375	0.014	0.01525	0.0175	0.0185	0.0215	0.0235	0.0265	-0.001125	-0.001125	-0.001	0.00025	-0.000875	-0.0005	1.3878e-17	-0.000125	-0.000125	-0.000125	-0.000125
DEDEDEDE	8	0.002625	0.002625	0.002625	0.002875	0.00275	0.00175	0.001875	0.004	0.003125	0.00425	0.002	0.003875	0.003875	0.00375	0.004	0.004875	0.003875	0.003875	0.006	0.005	0.005	0.007125	0.008875	0.008	0.009375	0.010375	0.012375	0.013625	0.013125	0.014375	0.016	0.01725	0.0195	0.0225	0.0235	0.0255	0.0285	-0.000125	-0.000125	1.3878e-17	0.00125	0.000125	0.0005	0.001	0.000875	0.000875	0.000875	0.000875
EDEDEDED	1	0.001625	0.001625	0.001625	0.001875	0.00175	0.00275	0.001875	0.003	0.002125	0.00325	0.002	0.002875	0.002875	0.00275	0.003	0.003875	0.003875	0.003875	0.005	0.004	0.006	0.007125	0.006875	0.009	0.010375	0.011375	0.013375	0.014625	0.016125	0.017375	0.02	0.02225	0.0245	0.0255	0.0285	0.0305	0.0325	-0.001125	-0.001125	-0.001	-0.00175	-0.001875	-0.0005	1.3878e-17	-0.000125	-0.000125	-0.000125	-0.000125
EDEDEDED	2	0.003625	0.003625	0.003625	0.003875	0.00375	0.00375	0.003875	0.004	0.004125	0.00525	0.004	0.003875	0.004875	0.00475	0.005	0.004875	0.005875	0.005875	0.007	0.008	0.008	0.010125	0.009875	0.012	0.013375	0.014375	0.016375	0.018625	0.020125	0.022375	0.024	0.02625	0.0285	0.0305	0.0325	0.0355	0.0375	-0.002125	-0.002125	-0.001	-0.00175	-0.000875	-0.0005	1.3878e-17	-0.000125	-0.000125	-0.000125	-0.000125
EDEDEDED	3	0.002625	0.002625	0.002625	0.002875	0.00275	0.00175	0.002875	0.002	0.002125	0.00225	0.003	0.002875	0.002875	0.00275	0.003	0.003875	0.003875	0.003875	0.004	0.005	0.006	0.006125	0.007875	0.009	0.009375	0.011375	0.013375	0.014625	0.015125	0.018375	0.02	0.02125	0.0235	0.0255	0.0275	0.0295	0.0325	0.000875	0.000875	0.001	0.00125	0.002125	0.0015	0.003	0.002875	0.002875	0.002875	0.002875
EDEDEDED	4	0.003625	0.003625	0.003625	0.003875	0.00275	0.00275	0.002875	0.003	0.003125	0.00325	0.003	0.003875	0.003875	0.00375	0.004	0.004875	0.004875	0.005875	0.006	0.007	0.008	0.009125	0.010875	0.012	0.013375	0.015375	0.017375	0.019625	0.020125	0.023375	0.025	0.02725	0.0295	0.0315	0.0335	0.0365	0.0395	-0.002125	-0.002125	-0.003	-0.00075	-0.001875	-0.0015	-0.001	-0.000125	-0.001125	-0.001125	-0.002125
EDEDEDED	5	0.003625	0.003625	0.003625	0.002875	0.00275	0.00275	0.002875	0.003	0.003125	0.00425	0.003	0.001875	0.001875	0.00275	0.003	0.002875	0.002875	0.002875	0.005	0.005	0.005	0.006125	0.006875	0.008	0.010375	0.010375	0.013375	0.014625	0.016125	0.017375	0.018	0.02025	0.0235	0.0265	0.0275	0.0305	0.0315	-0.000125	-0.000125	1.3878e-17	0.00125	0.001125	0.0015	0.002	0.001875	0.001875	0.001875	0.001875
EDEDEDED	6	0.003625	0.003625	0.003625	0.003875	0.00275	0.00375	0.002875	0.004	0.003125	0.00425	0.004	0.003875	0.003875	0.00475	0.005	0.004875	0.004875	0.005875	0.006	0.007	0.008	0.009125	0.009875	0.011	0.012375	0.014375	0.015375	0.016625	0.018125	0.020375	0.022	0.02425	0.0265	0.0285	0.0305	0.0325	0.0355	-0.001125	-0.001125	-0.001	-0.00075	-0.000875	-0.0005	1.3878e-17	-0.000125	-0.000125	-0.000125	-0.000125
EDEDEDED	7	0.002625	0.002625	0.002625	0.003875	0.00175	0.00175	0.001875	0.002	0.002125	0.00225	0.002	0.001875	0.002875	0.00275	0.003	0.002875	0.002875	0.002875	0.004	0.004	0.005	0.006125	0.006875	0.008	0.009375	0.010375	0.011375	0.012625	0.014125	0.016375	0.018	0.02025	0.0225	0.0245	0.0275	0.0295	0.0325	-0.001125	-0.001125	-0.001	-0.00075	-0.000875	-0.0005	1.3878e-17	-0.000125	-0.000125	-0.000125	-0.000125
EDEDEDED	8	0.007625	0.007625	0.007625	0.002875	0.00275	0.00275	0.002875	0.002	0.002125	0.00225	0.002	0.002875	0.002875	0.00275	0.003	0.002875	0.003875	0.003875	0.005	0.007	0.008	0.007125	0.008875	0.01	0.011375	0.012375	0.014375	0.016625	0.017125	0.019375	0.021	0.02525	0.0275	0.0295	0.0345	0.0355	0.0385	-0.001125	-0.001125	-0.001	-0.00075	-0.000875	-0.0005	1.3878e-17	-0.000125	-0.000125	-0.000125	-0.000125
[truncated: 241 more columns]

## Sheet: FigureS8abc
Treatment	Rate of adaptation	Final growth rate
no drug	0.004305	0.856744
no drug	0.005496	0.854456
no drug	0.004894	0.869347
no drug	0.005109	0.973435
no drug	0.003882	0.700887
no drug	0.005314	0.923656
no drug	0.005653	0.864624
ERY	0.005059	0.571841
ERY	0.001892	0.467474
ERY	0.004494	0.508337
ERY	0.003166	0.474474
ERY	0.003636	0.674338
ERY	0.002961	0.514875
ERY	0.004297	0.525384
ERY	0.001972	0.695164
DOX	0.0009	0.519404
DOX	0.00367	0.768443
DOX	0.001169	0.536238
DOX	0.001062	0.532315
DOX	0.003307	0.757547
DOX	0.002493	0.510986
ERY-DOX	0.000998	0.434379
ERY-DOX	0.000848	0.440417
ERY-DOX	0.002623	0.493064
ERY-DOX	0.000977	0.476357
ERY-DOX	0.00123	0.517472
ERY-DOX	0.00388	0.48498
ERY-DOX	0.001036	0.465866
ERY-DOX	0.003049	0.532421
DOX-ERY	0.000964	0.469773
DOX-ERY	0.002699	0.445221
DOX-ERY	0.001649	0.481031
DOX-ERY	0.002481	0.521661
DOX-ERY	0.001531	0.373888
DOX-ERY	0.002193	0.403176
DOX-ERY	0.002081	0.517968
DOX-ERY	0.003236	0.448221
50-50	0.002773	0.478797
50-50	0.005128	0.396169
50-50	0.007413	0.372521
50-50	0.005815	0.470958
50-50	0.010326	0.658263
50-50	0.005468	0.552363
50-50	0.01346	0.710847
50-50	0.007131	0.668652

## Sheet: FigureS9
Treatment	Season	Replicate	Value
DDDDDDDD	1	1	0.0245
DDDDDDDD	1	2	0.0255
DDDDDDDD	1	3	0.0205
DDDDDDDD	1	4	0.0215
DDDDDDDD	1	5	0.0255
DDDDDDDD	1	6	0.0235
DDDDDDDD	1	7	0.0165
DDDDDDDD	1	8	0.0185
DDDDDDDD	1	9	0.0175
DDDDDDDD	1	10	0.0275
DDDDDDDD	1	11	0.0245
DDDDDDDD	1	12	0.0205
DDDDDDDD	1	13	0.0275
DDDDDDDD	1	14	0.0305
DDDDDDDD	1	15	0.0345
DDDDDDDD	1	16	0.0235
DDDDDDDD	1	17	0.0325
DDDDDDDD	1	18	0.0345
DDDDDDDD	1	19	0.0345
DDDDDDDD	1	20	0.0265
DDDDDDDD	1	21	0.0205
DDDDDDDD	1	22	0.0225
DDDDDDDD	1	23	0.0245
DDDDDDDD	1	24	0.0275
DDDDDDDD	1	25	0.0255
DDDDDDDD	1	26	0.0275
DDDDDDDD	1	27	0.0215
DDDDDDDD	1	28	0.0185
DDDDDDDD	1	29	0.0285
DDDDDDDD	1	30	0.0255
DDDDDDDD	1	31	0.0265
DDDDDDDD	1	32	0.0225
DDDDDDDD	1	33	0.0385
DDDDDDDD	1	34	0.0225
DDDDDDDD	1	35	0.0245
DDDDDDDD	1	36	0.0275
DDDDDDDD	1	37	0.0265
DDDDDDDD	1	38	0.0255
DDDDDDDD	1	39	0.0315
DDDDDDDD	1	40	0.0295
DDDDDDDD	1	41	0.0255
DDDDDDDD	1	42	0.0305
DDDDDDDD	1	43	0.0265
DDDDDDDD	1	44	0.0285
DDDDDDDD	1	45	0.0235
DDDDDDDD	1	46	0.0215
DDDDDDDD	1	47	0.0315
DDDDDDDD	1	48	0.0255
DDDDDDDD	1	49	0.0255
DDDDDDDD	1	50	0.0265
DDDDDDDD	1	51	0.0245
DDDDDDDD	1	52	0.0165
DDDDDDDD	1	53	0.0215
DDDDDDDD	1	54	0.0265
DDDDDDDD	1	55	0.0195
DDDDDDDD	1	56	0.0175
DDDDDDDD	1	57	0.0155
DDDDDDDD	1	58	0.0245
DDDDDDDD	1	59	0.0375
DDDDDDDD	1	60	0.0195
DDDDDDDD	1	61	0.0125
DDDDDDDD	1	62	0.0235
DDDDDDDD	1	63	0.0255
DDDDDDDD	1	64	0.0225
DDDDDDDD	1	65	0.0195
DDDDDDDD	1	66	0.0135
DDDDDDDD	1	67	0.0115
DDDDDDDD	1	68	0.0115
DDDDDDDD	1	69	0.0075
DDDDDDDD	1	70	0.0235
DDDDDDDD	1	71	0.0225
DDDDDDDD	1	72	0.0245
DDDDDDDD	1	73	0.0225
DDDDDDDD	1	74	0.0205
DDDDDDDD	1	75	0.0275
DDDDDDDD	1	76	0.0305
DDDDDDDD	1	77	0.0185
DDDDDDDD	1	78	0.0175
DDDDDDDD	1	79	0.0235
DDDDDDDD	1	80	0.0275
DDDDDDDD	1	81	0.0255
DDDDDDDD	1	82	0.0185
DDDDDDDD	1	83	0.0185
DDDDDDDD	1	84	0.0225
DDDDDDDD	1	85	0.0185
DDDDDDDD	1	86	0.0205
DDDDDDDD	1	87	0.0245
DDDDDDDD	1	88	0.0185
DDDDDDDD	1	89	0.0225
DDDDDDDD	1	90	0.0225
DDDDDDDD	1	91	0.0185
DDDDDDDD	1	92	0.0245
DDDDDDDD	1	93	0.0225
DDDDDDDD	1	94	0.0225
DDDDDDDD	1	95	0.0245
DDDDDDDD	1	96	0.0275
DDDDDDDD	1	97	0.0215
DDDDDDDD	1	98	0.0175
DDDDDDDD	1	99	0.0185
DDDDDDDD	1	100	0.0185
DDDDDDDD	1	101	0.0185
DDDDDDDD	1	102	0.0215
DDDDDDDD	1	103	0.0205
DDDDDDDD	1	104	0.0185
DDDDDDDD	1	105	0.0135
DDDDDDDD	1	106	0.0205
DDDDDDDD	1	107	0.0185
DDDDDDDD	1	108	0.0135
DDDDDDDD	1	109	0.0205
DDDDDDDD	1	110	0.0185
DDDDDDDD	1	111	0.0135
DDDDDDDD	1	112	0.0205
DDDDDDDD	1	113	0.0185
DDDDDDDD	1	114	0.0135
DDDDEEEE	1	1	0.0245
DDDDEEEE	1	2	0.0255
DDDDEEEE	1	3	0.0205
DDDDEEEE	1	4	0.0215
DDDDEEEE	1	5	0.0255
DDDDEEEE	1	6	0.0235
DDDDEEEE	1	7	0.0165
DDDDEEEE	1	8	0.0185
DDDDEEEE	1	9	0.0175
DDDDEEEE	1	10	0.0275
DDDDEEEE	1	11	0.0245
DDDDEEEE	1	12	0.0205
DDDDEEEE	1	13	0.0275
DDDDEEEE	1	14	0.0305
DDDDEEEE	1	15	0.0345
DDDDEEEE	1	16	0.0235
DDDDEEEE	1	17	0.0325
DDDDEEEE	1	18	0.0345
DDDDEEEE	1	19	0.0345
DDDDEEEE	1	20	0.0265
DDDDEEEE	1	21	0.0205
DDDDEEEE	1	22	0.0225
DDDDEEEE	1	23	0.0245
DDDDEEEE	1	24	0.0275
DDDDEEEE	1	25	0.0255
DDDDEEEE	1	26	0.0275
DDDDEEEE	1	27	0.0215
DDDDEEEE	1	28	0.0185
DDDDEEEE	1	29	0.0285
DDDDEEEE	1	30	0.0255
DDDDEEEE	1	31	0.0265
DDDDEEEE	1	32	0.0225
DDDDEEEE	1	33	0.0385
DDDDEEEE	1	34	0.0225
DDDDEEEE	1	35	0.0245
DDDDEEEE	1	36	0.0275
DDDDEEEE	1	37	0.0265
DDDDEEEE	1	38	0.0255
DDDDEEEE	1	39	0.0315
DDDDEEEE	1	40	0.0295
DDDDEEEE	1	41	0.0255
DDDDEEEE	1	42	0.0305
DDDDEEEE	1	43	0.0265
DDDDEEEE	1	44	0.0285
DDDDEEEE	1	45	0.0235
DDDDEEEE	1	46	0.0215
DDDDEEEE	1	47	0.0315
DDDDEEEE	1	48	0.0255
DDDDEEEE	1	49	0.0255
DDDDEEEE	1	50	0.0265
DDDDEEEE	1	51	0.0245
DDDDEEEE	1	52	0.0165
DDDDEEEE	1	53	0.0215
DDDDEEEE	1	54	0.0265
DDDDEEEE	1	55	0.0195
DDDDEEEE	1	56	0.0175
DDDDEEEE	1	57	0.0155
DDDDEEEE	1	58	0.0245
DDDDEEEE	1	59	0.0375
DDDDEEEE	1	60	0.0195
DDDDEEEE	1	61	0.0125
DDDDEEEE	1	62	0.0235
DDDDEEEE	1	63	0.0255
DDDDEEEE	1	64	0.0225
DDDDEEEE	1	65	0.0195
DDDDEEEE	1	66	0.0135
DDDDEEEE	1	67	0.0115
DDDDEEEE	1	68	0.0115
DDDDEEEE	1	69	0.0075
DDDDEEEE	1	70	0.0235
DDDDEEEE	1	71	0.0225
DDDDEEEE	1	72	0.0245
DDDDEEEE	1	73	0.0225
DDDDEEEE	1	74	0.0205
DDDDEEEE	1	75	0.0275
DDDDEEEE	1	76	0.0305
DDDDEEEE	1	77	0.0185
DDDDEEEE	1	78	0.0175
DDDDEEEE	1	79	0.0235
DDDDEEEE	1	80	0.0275
DDDDEEEE	1	81	0.0255
DDDDEEEE	1	82	0.0185
DDDDEEEE	1	83	0.0185
DDDDEEEE	1	84	0.0225
DDDDEEEE	1	85	0.0185
DDDDEEEE	1	86	0.0205
DDDDEEEE	1	87	0.0245
DDDDEEEE	1	88	0.0185
DDDDEEEE	1	89	0.0225
DDDDEEEE	1	90	0.0225
DDDDEEEE	1	91	0.0185
DDDDEEEE	1	92	0.0245
DDDDEEEE	1	93	0.0225
DDDDEEEE	1	94	0.0225
DDDDEEEE	1	95	0.0245
DDDDEEEE	1	96	0.0275
DDDDEEEE	1	97	0.0215
DDDDEEEE	1	98	0.0175
DDDDEEEE	1	99	0.0185
DDDDEEEE	1	100	0.0185
DDDDEEEE	1	101	0.0185
DDDDEEEE	1	102	0.0215
DDDDEEEE	1	103	0.0205
DDDDEEEE	1	104	0.0185
DDDDEEEE	1	105	0.0135
DDDDEEEE	1	106	0.0205
DDDDEEEE	1	107	0.0185
DDDDEEEE	1	108	0.0135
DDDDEEEE	1	109	0.0205
DDDDEEEE	1	110	0.0185
DDDDEEEE	1	111	0.0135
DDDDEEEE	1	112	0.0205
DDDDEEEE	1	113	0.0185
DDDDEEEE	1	114	0.0135
DDDEDEEE	1	1	0.0245
DDDEDEEE	1	2	0.0255
DDDEDEEE	1	3	0.0205
DDDEDEEE	1	4	0.0215
DDDEDEEE	1	5	0.0255
DDDEDEEE	1	6	0.0235
DDDEDEEE	1	7	0.0165
DDDEDEEE	1	8	0.0185
DDDEDEEE	1	9	0.0175
DDDEDEEE	1	10	0.0275
DDDEDEEE	1	11	0.0245
DDDEDEEE	1	12	0.0205
DDDEDEEE	1	13	0.0275
DDDEDEEE	1	14	0.0305
DDDEDEEE	1	15	0.0345
DDDEDEEE	1	16	0.0235
DDDEDEEE	1	17	0.0325
DDDEDEEE	1	18	0.0345
DDDEDEEE	1	19	0.0345
DDDEDEEE	1	20	0.0265
DDDEDEEE	1	21	0.0205
DDDEDEEE	1	22	0.0225
DDDEDEEE	1	23	0.0245
DDDEDEEE	1	24	0.0275
DDDEDEEE	1	25	0.0255
DDDEDEEE	1	26	0.0275
DDDEDEEE	1	27	0.0215
DDDEDEEE	1	28	0.0185
DDDEDEEE	1	29	0.0285
DDDEDEEE	1	30	0.0255
DDDEDEEE	1	31	0.0265
DDDEDEEE	1	32	0.0225
DDDEDEEE	1	33	0.0385
DDDEDEEE	1	34	0.0225
DDDEDEEE	1	35	0.0245
DDDEDEEE	1	36	0.0275
DDDEDEEE	1	37	0.0265
DDDEDEEE	1	38	0.0255
DDDEDEEE	1	39	0.0315
DDDEDEEE	1	40	0.0295
DDDEDEEE	1	41	0.0255
DDDEDEEE	1	42	0.0305
DDDEDEEE	1	43	0.0265
DDDEDEEE	1	44	0.0285
DDDEDEEE	1	45	0.0235
DDDEDEEE	1	46	0.0215
DDDEDEEE	1	47	0.0315
DDDEDEEE	1	48	0.0255
DDDEDEEE	1	49	0.0255
DDDEDEEE	1	50	0.0265
DDDEDEEE	1	51	0.0245
DDDEDEEE	1	52	0.0165
DDDEDEEE	1	53	0.0215
DDDEDEEE	1	54	0.0265
DDDEDEEE	1	55	0.0195
DDDEDEEE	1	56	0.0175
DDDEDEEE	1	57	0.0155
DDDEDEEE	1	58	0.0245
DDDEDEEE	1	59	0.0375
DDDEDEEE	1	60	0.0195
DDDEDEEE	1	61	0.0125
DDDEDEEE	1	62	0.0235
DDDEDEEE	1	63	0.0255
DDDEDEEE	1	64	0.0225
DDDEDEEE	1	65	0.0195
DDDEDEEE	1	66	0.0135
DDDEDEEE	1	67	0.0115
DDDEDEEE	1	68	0.0115
DDDEDEEE	1	69	0.0075
DDDEDEEE	1	70	0.0235
DDDEDEEE	1	71	0.0225
DDDEDEEE	1	72	0.0245
DDDEDEEE	1	73	0.0225
DDDEDEEE	1	74	0.0205
DDDEDEEE	1	75	0.0275
DDDEDEEE	1	76	0.0305
DDDEDEEE	1	77	0.0185
DDDEDEEE	1	78	0.0175
DDDEDEEE	1	79	0.0235
DDDEDEEE	1	80	0.0275
DDDEDEEE	1	81	0.0255
DDDEDEEE	1	82	0.0185
DDDEDEEE	1	83	0.0185
DDDEDEEE	1	84	0.0225
DDDEDEEE	1	85	0.0185
DDDEDEEE	1	86	0.0205
DDDEDEEE	1	87	0.0245
DDDEDEEE	1	88	0.0185
DDDEDEEE	1	89	0.0225
DDDEDEEE	1	90	0.0225
DDDEDEEE	1	91	0.0185
DDDEDEEE	1	92	0.0245
DDDEDEEE	1	93	0.0225
DDDEDEEE	1	94	0.0225
DDDEDEEE	1	95	0.0245
DDDEDEEE	1	96	0.0275
DDDEDEEE	1	97	0.0215
DDDEDEEE	1	98	0.0175
DDDEDEEE	1	99	0.0185
DDDEDEEE	1	100	0.0185
DDDEDEEE	1	101	0.0185
DDDEDEEE	1	102	0.0215
DDDEDEEE	1	103	0.0205
DDDEDEEE	1	104	0.0185
DDDEDEEE	1	105	0.0135
DDDEDEEE	1	106	0.0205
DDDEDEEE	1	107	0.0185
DDDEDEEE	1	108	0.0135
DDDEDEEE	1	109	0.0205
DDDEDEEE	1	110	0.0185
DDDEDEEE	1	111	0.0135
DDDEDEEE	1	112	0.0205
DDDEDEEE	1	113	0.0185
DDDEDEEE	1	114	0.0135
DDDEEDEE	1	1	0.0245
DDDEEDEE	1	2	0.0255
DDDEEDEE	1	3	0.0205
DDDEEDEE	1	4	0.0215
DDDEEDEE	1	5	0.0255
DDDEEDEE	1	6	0.0235
DDDEEDEE	1	7	0.0165
DDDEEDEE	1	8	0.0185
DDDEEDEE	1	9	0.0175
DDDEEDEE	1	10	0.0275
DDDEEDEE	1	11	0.0245
DDDEEDEE	1	12	0.0205
DDDEEDEE	1	13	0.0275
DDDEEDEE	1	14	0.0305
DDDEEDEE	1	15	0.0345
DDDEEDEE	1	16	0.0235
DDDEEDEE	1	17	0.0325
DDDEEDEE	1	18	0.0345
DDDEEDEE	1	19	0.0345
DDDEEDEE	1	20	0.0265
DDDEEDEE	1	21	0.0205
DDDEEDEE	1	22	0.0225
DDDEEDEE	1	23	0.0245
DDDEEDEE	1	24	0.0275
DDDEEDEE	1	25	0.0255
DDDEEDEE	1	26	0.0275
DDDEEDEE	1	27	0.0215
DDDEEDEE	1	28	0.0185
DDDEEDEE	1	29	0.0285
DDDEEDEE	1	30	0.0255
DDDEEDEE	1	31	0.0265
DDDEEDEE	1	32	0.0225
DDDEEDEE	1	33	0.0385
DDDEEDEE	1	34	0.0225
DDDEEDEE	1	35	0.0245
DDDEEDEE	1	36	0.0275
DDDEEDEE	1	37	0.0265
DDDEEDEE	1	38	0.0255
DDDEEDEE	1	39	0.0315
DDDEEDEE	1	40	0.0295
DDDEEDEE	1	41	0.0255
DDDEEDEE	1	42	0.0305
DDDEEDEE	1	43	0.0265
DDDEEDEE	1	44	0.0285
DDDEEDEE	1	45	0.0235
DDDEEDEE	1	46	0.0215
DDDEEDEE	1	47	0.0315
DDDEEDEE	1	48	0.0255
DDDEEDEE	1	49	0.0255
DDDEEDEE	1	50	0.0265
DDDEEDEE	1	51	0.0245
DDDEEDEE	1	52	0.0165
DDDEEDEE	1	53	0.0215
DDDEEDEE	1	54	0.0265
DDDEEDEE	1	55	0.0195
DDDEEDEE	1	56	0.0175
DDDEEDEE	1	57	0.0155
DDDEEDEE	1	58	0.0245
DDDEEDEE	1	59	0.0375
DDDEEDEE	1	60	0.0195
DDDEEDEE	1	61	0.0125
DDDEEDEE	1	62	0.0235
DDDEEDEE	1	63	0.0255
DDDEEDEE	1	64	0.0225
DDDEEDEE	1	65	0.0195
DDDEEDEE	1	66	0.0135
DDDEEDEE	1	67	0.0115
DDDEEDEE	1	68	0.0115
DDDEEDEE	1	69	0.0075
DDDEEDEE	1	70	0.0235
DDDEEDEE	1	71	0.0225
DDDEEDEE	1	72	0.0245
DDDEEDEE	1	73	0.0225
DDDEEDEE	1	74	0.0205
DDDEEDEE	1	75	0.0275
DDDEEDEE	1	76	0.0305
DDDEEDEE	1	77	0.0185
DDDEEDEE	1	78	0.0175
DDDEEDEE	1	79	0.0235
DDDEEDEE	1	80	0.0275
DDDEEDEE	1	81	0.0255
DDDEEDEE	1	82	0.0185
DDDEEDEE	1	83	0.0185
DDDEEDEE	1	84	0.0225
DDDEEDEE	1	85	0.0185
DDDEEDEE	1	86	0.0205
DDDEEDEE	1	87	0.0245
DDDEEDEE	1	88	0.0185
DDDEEDEE	1	89	0.0225
DDDEEDEE	1	90	0.0225
DDDEEDEE	1	91	0.0185
DDDEEDEE	1	92	0.0245
DDDEEDEE	1	93	0.0225
DDDEEDEE	1	94	0.0225
DDDEEDEE	1	95	0.0245
DDDEEDEE	1	96	0.0275
DDDEEDEE	1	97	0.0215
DDDEEDEE	1	98	0.0175
DDDEEDEE	1	99	0.0185
DDDEEDEE	1	100	0.0185
DDDEEDEE	1	101	0.0185
DDDEEDEE	1	102	0.0215
DDDEEDEE	1	103	0.0205
DDDEEDEE	1	104	0.0185
DDDEEDEE	1	105	0.0135
DDDEEDEE	1	106	0.0205
DDDEEDEE	1	107	0.0185
DDDEEDEE	1	108	0.0135
DDDEEDEE	1	109	0.0205
DDDEEDEE	1	110	0.0185
DDDEEDEE	1	111	0.0135
DDDEEDEE	1	112	0.0205
DDDEEDEE	1	113	0.0185
DDDEEDEE	1	114	0.0135
DDDEEEDE	1	1	0.0245
DDDEEEDE	1	2	0.0255
DDDEEEDE	1	3	0.0205
DDDEEEDE	1	4	0.0215
DDDEEEDE	1	5	0.0255
DDDEEEDE	1	6	0.0235
DDDEEEDE	1	7	0.0165
DDDEEEDE	1	8	0.0185
DDDEEEDE	1	9	0.0175
DDDEEEDE	1	10	0.0275
DDDEEEDE	1	11	0.0245
DDDEEEDE	1	12	0.0205
DDDEEEDE	1	13	0.0275
DDDEEEDE	1	14	0.0305
DDDEEEDE	1	15	0.0345
DDDEEEDE	1	16	0.0235
DDDEEEDE	1	17	0.0325
DDDEEEDE	1	18	0.0345
DDDEEEDE	1	19	0.0345
DDDEEEDE	1	20	0.0265
DDDEEEDE	1	21	0.0205
DDDEEEDE	1	22	0.0225
DDDEEEDE	1	23	0.0245
DDDEEEDE	1	24	0.0275
DDDEEEDE	1	25	0.0255
DDDEEEDE	1	26	0.0275
DDDEEEDE	1	27	0.0215
DDDEEEDE	1	28	0.0185
DDDEEEDE	1	29	0.0285
DDDEEEDE	1	30	0.0255
DDDEEEDE	1	31	0.0265
DDDEEEDE	1	32	0.0225
DDDEEEDE	1	33	0.0385
DDDEEEDE	1	34	0.0225
DDDEEEDE	1	35	0.0245
DDDEEEDE	1	36	0.0275
DDDEEEDE	1	37	0.0265
DDDEEEDE	1	38	0.0255
DDDEEEDE	1	39	0.0315
DDDEEEDE	1	40	0.0295
DDDEEEDE	1	41	0.0255
DDDEEEDE	1	42	0.0305
DDDEEEDE	1	43	0.0265
DDDEEEDE	1	44	0.0285
DDDEEEDE	1	45	0.0235
DDDEEEDE	1	46	0.0215
DDDEEEDE	1	47	0.0315
DDDEEEDE	1	48	0.0255
DDDEEEDE	1	49	0.0255
DDDEEEDE	1	50	0.0265
DDDEEEDE	1	51	0.0245
DDDEEEDE	1	52	0.0165
DDDEEEDE	1	53	0.0215
DDDEEEDE	1	54	0.0265
DDDEEEDE	1	55	0.0195
DDDEEEDE	1	56	0.0175
DDDEEEDE	1	57	0.0155
DDDEEEDE	1	58	0.0245
DDDEEEDE	1	59	0.0375
DDDEEEDE	1	60	0.0195
DDDEEEDE	1	61	0.0125
DDDEEEDE	1	62	0.0235
DDDEEEDE	1	63	0.0255
DDDEEEDE	1	64	0.0225
DDDEEEDE	1	65	0.0195
DDDEEEDE	1	66	0.0135
DDDEEEDE	1	67	0.0115
DDDEEEDE	1	68	0.0115
DDDEEEDE	1	69	0.0075
DDDEEEDE	1	70	0.0235
DDDEEEDE	1	71	0.0225
DDDEEEDE	1	72	0.0245
DDDEEEDE	1	73	0.0225
DDDEEEDE	1	74	0.0205
DDDEEEDE	1	75	0.0275
DDDEEEDE	1	76	0.0305
DDDEEEDE	1	77	0.0185
DDDEEEDE	1	78	0.0175
DDDEEEDE	1	79	0.0235
DDDEEEDE	1	80	0.0275
DDDEEEDE	1	81	0.0255
DDDEEEDE	1	82	0.0185
DDDEEEDE	1	83	0.0185
DDDEEEDE	1	84	0.0225
DDDEEEDE	1	85	0.0185
DDDEEEDE	1	86	0.0205
DDDEEEDE	1	87	0.0245
DDDEEEDE	1	88	0.0185
DDDEEEDE	1	89	0.0225
DDDEEEDE	1	90	0.0225
DDDEEEDE	1	91	0.0185
DDDEEEDE	1	92	0.0245
DDDEEEDE	1	93	0.0225
DDDEEEDE	1	94	0.0225
DDDEEEDE	1	95	0.0245
DDDEEEDE	1	96	0.0275
DDDEEEDE	1	97	0.0215
DDDEEEDE	1	98	0.0175
DDDEEEDE	1	99	0.0185
DDDEEEDE	1	100	0.0185
DDDEEEDE	1	101	0.0185
DDDEEEDE	1	102	0.0215
DDDEEEDE	1	103	0.0205
DDDEEEDE	1	104	0.0185
DDDEEEDE	1	105	0.0135
DDDEEEDE	1	106	0.0205
DDDEEEDE	1	107	0.0185
DDDEEEDE	1	108	0.0135
DDDEEEDE	1	109	0.0205
DDDEEEDE	1	110	0.0185
DDDEEEDE	1	111	0.0135
DDDEEEDE	1	112	0.0205
DDDEEEDE	1	113	0.0185
DDDEEEDE	1	114	0.0135
DDDEEEED	1	1	0.0245
DDDEEEED	1	2	0.0255
DDDEEEED	1	3	0.0205
DDDEEEED	1	4	0.0215
DDDEEEED	1	5	0.0255
DDDEEEED	1	6	0.0235
DDDEEEED	1	7	0.0165
DDDEEEED	1	8	0.0185
DDDEEEED	1	9	0.0175
DDDEEEED	1	10	0.0275
DDDEEEED	1	11	0.0245
DDDEEEED	1	12	0.0205
DDDEEEED	1	13	0.0275
DDDEEEED	1	14	0.0305
DDDEEEED	1	15	0.0345
DDDEEEED	1	16	0.0235
DDDEEEED	1	17	0.0325
DDDEEEED	1	18	0.0345
DDDEEEED	1	19	0.0345
DDDEEEED	1	20	0.0265
DDDEEEED	1	21	0.0205
DDDEEEED	1	22	0.0225
DDDEEEED	1	23	0.0245
DDDEEEED	1	24	0.0275
DDDEEEED	1	25	0.0255
DDDEEEED	1	26	0.0275
DDDEEEED	1	27	0.0215
DDDEEEED	1	28	0.0185
DDDEEEED	1	29	0.0285
DDDEEEED	1	30	0.0255
DDDEEEED	1	31	0.0265
DDDEEEED	1	32	0.0225
DDDEEEED	1	33	0.0385
DDDEEEED	1	34	0.0225
DDDEEEED	1	35	0.0245
DDDEEEED	1	36	0.0275
DDDEEEED	1	37	0.0265
DDDEEEED	1	38	0.0255
DDDEEEED	1	39	0.0315
DDDEEEED	1	40	0.0295
DDDEEEED	1	41	0.0255
DDDEEEED	1	42	0.0305
DDDEEEED	1	43	0.0265
DDDEEEED	1	44	0.0285
DDDEEEED	1	45	0.0235
DDDEEEED	1	46	0.0215
DDDEEEED	1	47	0.0315
DDDEEEED	1	48	0.0255
DDDEEEED	1	49	0.0255
DDDEEEED	1	50	0.0265
DDDEEEED	1	51	0.0245
DDDEEEED	1	52	0.0165
DDDEEEED	1	53	0.0215
DDDEEEED	1	54	0.0265
DDDEEEED	1	55	0.0195
DDDEEEED	1	56	0.0175
DDDEEEED	1	57	0.0155
DDDEEEED	1	58	0.0245
DDDEEEED	1	59	0.0375
DDDEEEED	1	60	0.0195
DDDEEEED	1	61	0.0125
DDDEEEED	1	62	0.0235
DDDEEEED	1	63	0.0255
DDDEEEED	1	64	0.0225
DDDEEEED	1	65	0.0195
DDDEEEED	1	66	0.0135
DDDEEEED	1	67	0.0115
DDDEEEED	1	68	0.0115
DDDEEEED	1	69	0.0075
DDDEEEED	1	70	0.0235
DDDEEEED	1	71	0.0225
DDDEEEED	1	72	0.0245
DDDEEEED	1	73	0.0225
DDDEEEED	1	74	0.0205
DDDEEEED	1	75	0.0275
DDDEEEED	1	76	0.0305
DDDEEEED	1	77	0.0185
DDDEEEED	1	78	0.0175
DDDEEEED	1	79	0.0235
DDDEEEED	1	80	0.0275
DDDEEEED	1	81	0.0255
DDDEEEED	1	82	0.0185
DDDEEEED	1	83	0.0185
DDDEEEED	1	84	0.0225
DDDEEEED	1	85	0.0185
DDDEEEED	1	86	0.0205
DDDEEEED	1	87	0.0245
DDDEEEED	1	88	0.0185
DDDEEEED	1	89	0.0225
DDDEEEED	1	90	0.0225
DDDEEEED	1	91	0.0185
DDDEEEED	1	92	0.0245
DDDEEEED	1	93	0.0225
DDDEEEED	1	94	0.0225
DDDEEEED	1	95	0.0245
DDDEEEED	1	96	0.0275
DDDEEEED	1	97	0.0215
DDDEEEED	1	98	0.0175
DDDEEEED	1	99	0.0185
DDDEEEED	1	100	0.0185
DDDEEEED	1	101	0.0185
DDDEEEED	1	102	0.0215
DDDEEEED	1	103	0.0205
DDDEEEED	1	104	0.0185
DDDEEEED	1	105	0.0135
DDDEEEED	1	106	0.0205
DDDEEEED	1	107	0.0185
DDDEEEED	1	108	0.0135
DDDEEEED	1	109	0.0205
DDDEEEED	1	110	0.0185
DDDEEEED	1	111	0.0135
DDDEEEED	1	112	0.0205
DDDEEEED	1	113	0.0185
DDDEEEED	1	114	0.0135
DDEDDEEE	1	1	0.0245
DDEDDEEE	1	2	0.0255
DDEDDEEE	1	3	0.0205
DDEDDEEE	1	4	0.0215
DDEDDEEE	1	5	0.0255
DDEDDEEE	1	6	0.0235
DDEDDEEE	1	7	0.0165
DDEDDEEE	1	8	0.0185
DDEDDEEE	1	9	0.0175
DDEDDEEE	1	10	0.0275
DDEDDEEE	1	11	0.0245
DDEDDEEE	1	12	0.0205
DDEDDEEE	1	13	0.0275
DDEDDEEE	1	14	0.0305
DDEDDEEE	1	15	0.0345
DDEDDEEE	1	16	0.0235
DDEDDEEE	1	17	0.0325
DDEDDEEE	1	18	0.0345
DDEDDEEE	1	19	0.0345
DDEDDEEE	1	20	0.0265
DDEDDEEE	1	21	0.0205
DDEDDEEE	1	22	0.0225
DDEDDEEE	1	23	0.0245
DDEDDEEE	1	24	0.0275
DDEDDEEE	1	25	0.0255
DDEDDEEE	1	26	0.0275
DDEDDEEE	1	27	0.0215
DDEDDEEE	1	28	0.0185
DDEDDEEE	1	29	0.0285
DDEDDEEE	1	30	0.0255
DDEDDEEE	1	31	0.0265
DDEDDEEE	1	32	0.0225
DDEDDEEE	1	33	0.0385
DDEDDEEE	1	34	0.0225
DDEDDEEE	1	35	0.0245
DDEDDEEE	1	36	0.0275
DDEDDEEE	1	37	0.0265
DDEDDEEE	1	38	0.0255
DDEDDEEE	1	39	0.0315
DDEDDEEE	1	40	0.0295
DDEDDEEE	1	41	0.0255
DDEDDEEE	1	42	0.0305
DDEDDEEE	1	43	0.0265
DDEDDEEE	1	44	0.0285
DDEDDEEE	1	45	0.0235
DDEDDEEE	1	46	0.0215
DDEDDEEE	1	47	0.0315
DDEDDEEE	1	48	0.0255
DDEDDEEE	1	49	0.0255
DDEDDEEE	1	50	0.0265
DDEDDEEE	1	51	0.0245
DDEDDEEE	1	52	0.0165
DDEDDEEE	1	53	0.0215
DDEDDEEE	1	54	0.0265
DDEDDEEE	1	55	0.0195
DDEDDEEE	1	56	0.0175
DDEDDEEE	1	57	0.0155
DDEDDEEE	1	58	0.0245
DDEDDEEE	1	59	0.0375
DDEDDEEE	1	60	0.0195
DDEDDEEE	1	61	0.0125
DDEDDEEE	1	62	0.0235
DDEDDEEE	1	63	0.0255
DDEDDEEE	1	64	0.0225
DDEDDEEE	1	65	0.0195
DDEDDEEE	1	66	0.0135
DDEDDEEE	1	67	0.0115
DDEDDEEE	1	68	0.0115
DDEDDEEE	1	69	0.0075
DDEDDEEE	1	70	0.0235
DDEDDEEE	1	71	0.0225
DDEDDEEE	1	72	0.0245
DDEDDEEE	1	73	0.0225
DDEDDEEE	1	74	0.0205
DDEDDEEE	1	75	0.0275
DDEDDEEE	1	76	0.0305
DDEDDEEE	1	77	0.0185
DDEDDEEE	1	78	0.0175
DDEDDEEE	1	79	0.0235
DDEDDEEE	1	80	0.0275
DDEDDEEE	1	81	0.0255
DDEDDEEE	1	82	0.0185
DDEDDEEE	1	83	0.0185
DDEDDEEE	1	84	0.0225
DDEDDEEE	1	85	0.0185
DDEDDEEE	1	86	0.0205
DDEDDEEE	1	87	0.0245
DDEDDEEE	1	88	0.0185
DDEDDEEE	1	89	0.0225
DDEDDEEE	1	90	0.0225
DDEDDEEE	1	91	0.0185
DDEDDEEE	1	92	0.0245
DDEDDEEE	1	93	0.0225
DDEDDEEE	1	94	0.0225
DDEDDEEE	1	95	0.0245
DDEDDEEE	1	96	0.0275
DDEDDEEE	1	97	0.0215
DDEDDEEE	1	98	0.0175
DDEDDEEE	1	99	0.0185
DDEDDEEE	1	100	0.0185
DDEDDEEE	1	101	0.0185
DDEDDEEE	1	102	0.0215
DDEDDEEE	1	103	0.0205
DDEDDEEE	1	104	0.0185
DDEDDEEE	1	105	0.0135
DDEDDEEE	1	106	0.0205
DDEDDEEE	1	107	0.0185
DDEDDEEE	1	108	0.0135
DDEDDEEE	1	109	0.0205
DDEDDEEE	1	110	0.0185
DDEDDEEE	1	111	0.0135
DDEDDEEE	1	112	0.0205
DDEDDEEE	1	113	0.0185
DDEDDEEE	1	114	0.0135
DDEDEDEE	1	1	0.0245
DDEDEDEE	1	2	0.0255
DDEDEDEE	1	3	0.0205
DDEDEDEE	1	4	0.0215
DDEDEDEE	1	5	0.0255
DDEDEDEE	1	6	0.0235
DDEDEDEE	1	7	0.0165
DDEDEDEE	1	8	0.0185
DDEDEDEE	1	9	0.0175
DDEDEDEE	1	10	0.0275
DDEDEDEE	1	11	0.0245
DDEDEDEE	1	12	0.0205
DDEDEDEE	1	13	0.0275
DDEDEDEE	1	14	0.0305
DDEDEDEE	1	15	0.0345
DDEDEDEE	1	16	0.0235
DDEDEDEE	1	17	0.0325
DDEDEDEE	1	18	0.0345
DDEDEDEE	1	19	0.0345
DDEDEDEE	1	20	0.0265
DDEDEDEE	1	21	0.0205
DDEDEDEE	1	22	0.0225
DDEDEDEE	1	23	0.0245
DDEDEDEE	1	24	0.0275
DDEDEDEE	1	25	0.0255
DDEDEDEE	1	26	0.0275
DDEDEDEE	1	27	0.0215
DDEDEDEE	1	28	0.0185
DDEDEDEE	1	29	0.0285
DDEDEDEE	1	30	0.0255
DDEDEDEE	1	31	0.0265
DDEDEDEE	1	32	0.0225
DDEDEDEE	1	33	0.0385
DDEDEDEE	1	34	0.0225
DDEDEDEE	1	35	0.0245
DDEDEDEE	1	36	0.0275
DDEDEDEE	1	37	0.0265
DDEDEDEE	1	38	0.0255
DDEDEDEE	1	39	0.0315
DDEDEDEE	1	40	0.0295
DDEDEDEE	1	41	0.0255
DDEDEDEE	1	42	0.0305
DDEDEDEE	1	43	0.0265
DDEDEDEE	1	44	0.0285
DDEDEDEE	1	45	0.0235
DDEDEDEE	1	46	0.0215
DDEDEDEE	1	47	0.0315
DDEDEDEE	1	48	0.0255
DDEDEDEE	1	49	0.0255
DDEDEDEE	1	50	0.0265
DDEDEDEE	1	51	0.0245
DDEDEDEE	1	52	0.0165
DDEDEDEE	1	53	0.0215
DDEDEDEE	1	54	0.0265
DDEDEDEE	1	55	0.0195
DDEDEDEE	1	56	0.0175
DDEDEDEE	1	57	0.0155
DDEDEDEE	1	58	0.0245
DDEDEDEE	1	59	0.0375
DDEDEDEE	1	60	0.0195
DDEDEDEE	1	61	0.0125
DDEDEDEE	1	62	0.0235
DDEDEDEE	1	63	0.0255
DDEDEDEE	1	64	0.0225
DDEDEDEE	1	65	0.0195
DDEDEDEE	1	66	0.0135
DDEDEDEE	1	67	0.0115
DDEDEDEE	1	68	0.0115
DDEDEDEE	1	69	0.0075
DDEDEDEE	1	70	0.0235
DDEDEDEE	1	71	0.0225
DDEDEDEE	1	72	0.0245
DDEDEDEE	1	73	0.0225
DDEDEDEE	1	74	0.0205
DDEDEDEE	1	75	0.0275
DDEDEDEE	1	76	0.0305
DDEDEDEE	1	77	0.0185
DDEDEDEE	1	78	0.0175
DDEDEDEE	1	79	0.0235
DDEDEDEE	1	80	0.0275
DDEDEDEE	1	81	0.0255
DDEDEDEE	1	82	0.0185
DDEDEDEE	1	83	0.0185
DDEDEDEE	1	84	0.0225
DDEDEDEE	1	85	0.0185
DDEDEDEE	1	86	0.0205
DDEDEDEE	1	87	0.0245
DDEDEDEE	1	88	0.0185
DDEDEDEE	1	89	0.0225
DDEDEDEE	1	90	0.0225
DDEDEDEE	1	91	0.0185
DDEDEDEE	1	92	0.0245
DDEDEDEE	1	93	0.0225
DDEDEDEE	1	94	0.0225
DDEDEDEE	1	95	0.0245
DDEDEDEE	1	96	0.0275
DDEDEDEE	1	97	0.0215
DDEDEDEE	1	98	0.0175
DDEDEDEE	1	99	0.0185
DDEDEDEE	1	100	0.0185
DDEDEDEE	1	101	0.0185
DDEDEDEE	1	102	0.0215
DDEDEDEE	1	103	0.0205
DDEDEDEE	1	104	0.0185
DDEDEDEE	1	105	0.0135
DDEDEDEE	1	106	0.0205
DDEDEDEE	1	107	0.0185
DDEDEDEE	1	108	0.0135
DDEDEDEE	1	109	0.0205
DDEDEDEE	1	110	0.0185
DDEDEDEE	1	111	0.0135
DDEDEDEE	1	112	0.0205
DDEDEDEE	1	113	0.0185
DDEDEDEE	1	114	0.0135
DDEDEEDE	1	1	0.0245
DDEDEEDE	1	2	0.0255
DDEDEEDE	1	3	0.0205
DDEDEEDE	1	4	0.0215
DDEDEEDE	1	5	0.0255
DDEDEEDE	1	6	0.0235
DDEDEEDE	1	7	0.0165
DDEDEEDE	1	8	0.0185
DDEDEEDE	1	9	0.0175
DDEDEEDE	1	10	0.0275
DDEDEEDE	1	11	0.0245
DDEDEEDE	1	12	0.0205
DDEDEEDE	1	13	0.0275
DDEDEEDE	1	14	0.0305
DDEDEEDE	1	15	0.0345
DDEDEEDE	1	16	0.0235
DDEDEEDE	1	17	0.0325
DDEDEEDE	1	18	0.0345
DDEDEEDE	1	19	0.0345
DDEDEEDE	1	20	0.0265
DDEDEEDE	1	21	0.0205
DDEDEEDE	1	22	0.0225
DDEDEEDE	1	23	0.0245
DDEDEEDE	1	24	0.0275
DDEDEEDE	1	25	0.0255
DDEDEEDE	1	26	0.0275
DDEDEEDE	1	27	0.0215
DDEDEEDE	1	28	0.0185
DDEDEEDE	1	29	0.0285
DDEDEEDE	1	30	0.0255
DDEDEEDE	1	31	0.0265
DDEDEEDE	1	32	0.0225
DDEDEEDE	1	33	0.0385
DDEDEEDE	1	34	0.0225
DDEDEEDE	1	35	0.0245
DDEDEEDE	1	36	0.0275
DDEDEEDE	1	37	0.0265
DDEDEEDE	1	38	0.0255
DDEDEEDE	1	39	0.0315
DDEDEEDE	1	40	0.0295
DDEDEEDE	1	41	0.0255
DDEDEEDE	1	42	0.0305
DDEDEEDE	1	43	0.0265
DDEDEEDE	1	44	0.0285
DDEDEEDE	1	45	0.0235
DDEDEEDE	1	46	0.0215
DDEDEEDE	1	47	0.0315
DDEDEEDE	1	48	0.0255
DDEDEEDE	1	49	0.0255
DDEDEEDE	1	50	0.0265
DDEDEEDE	1	51	0.0245
DDEDEEDE	1	52	0.0165
DDEDEEDE	1	53	0.0215
DDEDEEDE	1	54	0.0265
DDEDEEDE	1	55	0.0195
DDEDEEDE	1	56	0.0175
DDEDEEDE	1	57	0.0155
DDEDEEDE	1	58	0.0245
DDEDEEDE	1	59	0.0375
DDEDEEDE	1	60	0.0195
DDEDEEDE	1	61	0.0125
DDEDEEDE	1	62	0.0235
DDEDEEDE	1	63	0.0255
DDEDEEDE	1	64	0.0225
DDEDEEDE	1	65	0.0195
DDEDEEDE	1	66	0.0135
DDEDEEDE	1	67	0.0115
DDEDEEDE	1	68	0.0115
DDEDEEDE	1	69	0.0075
DDEDEEDE	1	70	0.0235
DDEDEEDE	1	71	0.0225
DDEDEEDE	1	72	0.0245
DDEDEEDE	1	73	0.0225
DDEDEEDE	1	74	0.0205
DDEDEEDE	1	75	0.0275
DDEDEEDE	1	76	0.0305
DDEDEEDE	1	77	0.0185
DDEDEEDE	1	78	0.0175
DDEDEEDE	1	79	0.0235
DDEDEEDE	1	80	0.0275
DDEDEEDE	1	81	0.0255
DDEDEEDE	1	82	0.0185
DDEDEEDE	1	83	0.0185
DDEDEEDE	1	84	0.0225
DDEDEEDE	1	85	0.0185
DDEDEEDE	1	86	0.0205
DDEDEEDE	1	87	0.0245
DDEDEEDE	1	88	0.0185
DDEDEEDE	1	89	0.0225
DDEDEEDE	1	90	0.0225
DDEDEEDE	1	91	0.0185
DDEDEEDE	1	92	0.0245
DDEDEEDE	1	93	0.0225
DDEDEEDE	1	94	0.0225
DDEDEEDE	1	95	0.0245
DDEDEEDE	1	96	0.0275
DDEDEEDE	1	97	0.0215
DDEDEEDE	1	98	0.0175
DDEDEEDE	1	99	0.0185
DDEDEEDE	1	100	0.0185
DDEDEEDE	1	101	0.0185
DDEDEEDE	1	102	0.0215
DDEDEEDE	1	103	0.0205
DDEDEEDE	1	104	0.0185
DDEDEEDE	1	105	0.0135
DDEDEEDE	1	106	0.0205
DDEDEEDE	1	107	0.0185
DDEDEEDE	1	108	0.0135
DDEDEEDE	1	109	0.0205
DDEDEEDE	1	110	0.0185
DDEDEEDE	1	111	0.0135
DDEDEEDE	1	112	0.0205
DDEDEEDE	1	113	0.0185
DDEDEEDE	1	114	0.0135
DDEDEEED	1	1	0.0245
DDEDEEED	1	2	0.0255
DDEDEEED	1	3	0.0205
DDEDEEED	1	4	0.0215
DDEDEEED	1	5	0.0255
DDEDEEED	1	6	0.0235
DDEDEEED	1	7	0.0165
DDEDEEED	1	8	0.0185
DDEDEEED	1	9	0.0175
DDEDEEED	1	10	0.0275
DDEDEEED	1	11	0.0245
DDEDEEED	1	12	0.0205
DDEDEEED	1	13	0.0275
DDEDEEED	1	14	0.0305
DDEDEEED	1	15	0.0345
DDEDEEED	1	16	0.0235
DDEDEEED	1	17	0.0325
DDEDEEED	1	18	0.0345
DDEDEEED	1	19	0.0345
DDEDEEED	1	20	0.0265
DDEDEEED	1	21	0.0205
DDEDEEED	1	22	0.0225
DDEDEEED	1	23	0.0245
DDEDEEED	1	24	0.0275
DDEDEEED	1	25	0.0255
DDEDEEED	1	26	0.0275
DDEDEEED	1	27	0.0215
DDEDEEED	1	28	0.0185
DDEDEEED	1	29	0.0285
DDEDEEED	1	30	0.0255
DDEDEEED	1	31	0.0265
DDEDEEED	1	32	0.0225
DDEDEEED	1	33	0.0385
DDEDEEED	1	34	0.0225
DDEDEEED	1	35	0.0245
DDEDEEED	1	36	0.0275
DDEDEEED	1	37	0.0265
DDEDEEED	1	38	0.0255
DDEDEEED	1	39	0.0315
DDEDEEED	1	40	0.0295
DDEDEEED	1	41	0.0255
DDEDEEED	1	42	0.0305
DDEDEEED	1	43	0.0265
DDEDEEED	1	44	0.0285
DDEDEEED	1	45	0.0235
DDEDEEED	1	46	0.0215
DDEDEEED	1	47	0.0315
DDEDEEED	1	48	0.0255
DDEDEEED	1	49	0.0255
DDEDEEED	1	50	0.0265
DDEDEEED	1	51	0.0245
DDEDEEED	1	52	0.0165
DDEDEEED	1	53	0.0215
DDEDEEED	1	54	0.0265
DDEDEEED	1	55	0.0195
DDEDEEED	1	56	0.0175
DDEDEEED	1	57	0.0155
DDEDEEED	1	58	0.0245
DDEDEEED	1	59	0.0375
DDEDEEED	1	60	0.0195
DDEDEEED	1	61	0.0125
DDEDEEED	1	62	0.0235
DDEDEEED	1	63	0.0255
DDEDEEED	1	64	0.0225
DDEDEEED	1	65	0.0195
DDEDEEED	1	66	0.0135
DDEDEEED	1	67	0.0115
DDEDEEED	1	68	0.0115
DDEDEEED	1	69	0.0075
DDEDEEED	1	70	0.0235
DDEDEEED	1	71	0.0225
DDEDEEED	1	72	0.0245
DDEDEEED	1	73	0.0225
DDEDEEED	1	74	0.0205
DDEDEEED	1	75	0.0275
DDEDEEED	1	76	0.0305
DDEDEEED	1	77	0.0185
DDEDEEED	1	78	0.0175
DDEDEEED	1	79	0.0235
DDEDEEED	1	80	0.0275
DDEDEEED	1	81	0.0255
DDEDEEED	1	82	0.0185
DDEDEEED	1	83	0.0185
DDEDEEED	1	84	0.0225
DDEDEEED	1	85	0.0185
DDEDEEED	1	86	0.0205
DDEDEEED	1	87	0.0245
DDEDEEED	1	88	0.0185
DDEDEEED	1	89	0.0225
DDEDEEED	1	90	0.0225
DDEDEEED	1	91	0.0185
DDEDEEED	1	92	0.0245
DDEDEEED	1	93	0.0225
DDEDEEED	1	94	0.0225
DDEDEEED	1	95	0.0245
DDEDEEED	1	96	0.0275
DDEDEEED	1	97	0.0215
DDEDEEED	1	98	0.0175
DDEDEEED	1	99	0.0185
DDEDEEED	1	100	0.0185
DDEDEEED	1	101	0.0185
DDEDEEED	1	102	0.0215
DDEDEEED	1	103	0.0205
DDEDEEED	1	104	0.0185
DDEDEEED	1	105	0.0135
DDEDEEED	1	106	0.0205
DDEDEEED	1	107	0.0185
DDEDEEED	1	108	0.0135
DDEDEEED	1	109	0.0205
DDEDEEED	1	110	0.0185
DDEDEEED	1	111	0.0135
DDEDEEED	1	112	0.0205
DDEDEEED	1	113	0.0185
DDEDEEED	1	114	0.0135
DDEEDDEE	1	1	0.0245
DDEEDDEE	1	2	0.0255
DDEEDDEE	1	3	0.0205
DDEEDDEE	1	4	0.0215
DDEEDDEE	1	5	0.0255
DDEEDDEE	1	6	0.0235
DDEEDDEE	1	7	0.0165
DDEEDDEE	1	8	0.0185
DDEEDDEE	1	9	0.0175
DDEEDDEE	1	10	0.0275
DDEEDDEE	1	11	0.0245
DDEEDDEE	1	12	0.0205
DDEEDDEE	1	13	0.0275
DDEEDDEE	1	14	0.0305
DDEEDDEE	1	15	0.0345
DDEEDDEE	1	16	0.0235
DDEEDDEE	1	17	0.0325
DDEEDDEE	1	18	0.0345
DDEEDDEE	1	19	0.0345
DDEEDDEE	1	20	0.0265
DDEEDDEE	1	21	0.0205
DDEEDDEE	1	22	0.0225
DDEEDDEE	1	23	0.0245
DDEEDDEE	1	24	0.0275
DDEEDDEE	1	25	0.0255
DDEEDDEE	1	26	0.0275
DDEEDDEE	1	27	0.0215
DDEEDDEE	1	28	0.0185
DDEEDDEE	1	29	0.0285
DDEEDDEE	1	30	0.0255
DDEEDDEE	1	31	0.0265
DDEEDDEE	1	32	0.0225
DDEEDDEE	1	33	0.0385
DDEEDDEE	1	34	0.0225
DDEEDDEE	1	35	0.0245
DDEEDDEE	1	36	0.0275
DDEEDDEE	1	37	0.0265
DDEEDDEE	1	38	0.0255
DDEEDDEE	1	39	0.0315
DDEEDDEE	1	40	0.0295
DDEEDDEE	1	41	0.0255
DDEEDDEE	1	42	0.0305
DDEEDDEE	1	43	0.0265
DDEEDDEE	1	44	0.0285
DDEEDDEE	1	45	0.0235
DDEEDDEE	1	46	0.0215
DDEEDDEE	1	47	0.0315
DDEEDDEE	1	48	0.0255
DDEEDDEE	1	49	0.0255
DDEEDDEE	1	50	0.0265
DDEEDDEE	1	51	0.0245
DDEEDDEE	1	52	0.0165
DDEEDDEE	1	53	0.0215
DDEEDDEE	1	54	0.0265
DDEEDDEE	1	55	0.0195
DDEEDDEE	1	56	0.0175
DDEEDDEE	1	57	0.0155
DDEEDDEE	1	58	0.0245
DDEEDDEE	1	59	0.0375
DDEEDDEE	1	60	0.0195
DDEEDDEE	1	61	0.0125
DDEEDDEE	1	62	0.0235
DDEEDDEE	1	63	0.0255
DDEEDDEE	1	64	0.0225
DDEEDDEE	1	65	0.0195
DDEEDDEE	1	66	0.0135
DDEEDDEE	1	67	0.0115
DDEEDDEE	1	68	0.0115
DDEEDDEE	1	69	0.0075
DDEEDDEE	1	70	0.0235
DDEEDDEE	1	71	0.0225
DDEEDDEE	1	72	0.0245
DDEEDDEE	1	73	0.0225
DDEEDDEE	1	74	0.0205
DDEEDDEE	1	75	0.0275
DDEEDDEE	1	76	0.0305
DDEEDDEE	1	77	0.0185
DDEEDDEE	1	78	0.0175
DDEEDDEE	1	79	0.0235
DDEEDDEE	1	80	0.0275
DDEEDDEE	1	81	0.0255
DDEEDDEE	1	82	0.0185
DDEEDDEE	1	83	0.0185
DDEEDDEE	1	84	0.0225
DDEEDDEE	1	85	0.0185
DDEEDDEE	1	86	0.0205
DDEEDDEE	1	87	0.0245
DDEEDDEE	1	88	0.0185
DDEEDDEE	1	89	0.0225
DDEEDDEE	1	90	0.0225
DDEEDDEE	1	91	0.0185
DDEEDDEE	1	92	0.0245
DDEEDDEE	1	93	0.0225
DDEEDDEE	1	94	0.0225
DDEEDDEE	1	95	0.0245
DDEEDDEE	1	96	0.0275
DDEEDDEE	1	97	0.0215
DDEEDDEE	1	98	0.0175
DDEEDDEE	1	99	0.0185
DDEEDDEE	1	100	0.0185
DDEEDDEE	1	101	0.0185
DDEEDDEE	1	102	0.0215
DDEEDDEE	1	103	0.0205
DDEEDDEE	1	104	0.0185
DDEEDDEE	1	105	0.0135
DDEEDDEE	1	106	0.0205
DDEEDDEE	1	107	0.0185
DDEEDDEE	1	108	0.0135
DDEEDDEE	1	109	0.0205
DDEEDDEE	1	110	0.0185
DDEEDDEE	1	111	0.0135
DDEEDDEE	1	112	0.0205
DDEEDDEE	1	113	0.0185
DDEEDDEE	1	114	0.0135
DDEEDEDE	1	1	0.0245
DDEEDEDE	1	2	0.0255
DDEEDEDE	1	3	0.0205
DDEEDEDE	1	4	0.0215
DDEEDEDE	1	5	0.0255
DDEEDEDE	1	6	0.0235
DDEEDEDE	1	7	0.0165
DDEEDEDE	1	8	0.0185
DDEEDEDE	1	9	0.0175
DDEEDEDE	1	10	0.0275
DDEEDEDE	1	11	0.0245
DDEEDEDE	1	12	0.0205
DDEEDEDE	1	13	0.0275
DDEEDEDE	1	14	0.0305
DDEEDEDE	1	15	0.0345
DDEEDEDE	1	16	0.0235
DDEEDEDE	1	17	0.0325
DDEEDEDE	1	18	0.0345
DDEEDEDE	1	19	0.0345
DDEEDEDE	1	20	0.0265
DDEEDEDE	1	21	0.0205
DDEEDEDE	1	22	0.0225
DDEEDEDE	1	23	0.0245
DDEEDEDE	1	24	0.0275
DDEEDEDE	1	25	0.0255
DDEEDEDE	1	26	0.0275
DDEEDEDE	1	27	0.0215
DDEEDEDE	1	28	0.0185
DDEEDEDE	1	29	0.0285
DDEEDEDE	1	30	0.0255
DDEEDEDE	1	31	0.0265
DDEEDEDE	1	32	0.0225
DDEEDEDE	1	33	0.0385
DDEEDEDE	1	34	0.0225
DDEEDEDE	1	35	0.0245
DDEEDEDE	1	36	0.0275
DDEEDEDE	1	37	0.0265
DDEEDEDE	1	38	0.0255
DDEEDEDE	1	39	0.0315
DDEEDEDE	1	40	0.0295
DDEEDEDE	1	41	0.0255
DDEEDEDE	1	42	0.0305
DDEEDEDE	1	43	0.0265
DDEEDEDE	1	44	0.0285
DDEEDEDE	1	45	0.0235
DDEEDEDE	1	46	0.0215
DDEEDEDE	1	47	0.0315
DDEEDEDE	1	48	0.0255
DDEEDEDE	1	49	0.0255
DDEEDEDE	1	50	0.0265
DDEEDEDE	1	51	0.0245
DDEEDEDE	1	52	0.0165
DDEEDEDE	1	53	0.0215
DDEEDEDE	1	54	0.0265
DDEEDEDE	1	55	0.0195
DDEEDEDE	1	56	0.0175
DDEEDEDE	1	57	0.0155
DDEEDEDE	1	58	0.0245
DDEEDEDE	1	59	0.0375
DDEEDEDE	1	60	0.0195
DDEEDEDE	1	61	0.0125
DDEEDEDE	1	62	0.0235
DDEEDEDE	1	63	0.0255
DDEEDEDE	1	64	0.0225
DDEEDEDE	1	65	0.0195
DDEEDEDE	1	66	0.0135
DDEEDEDE	1	67	0.0115
DDEEDEDE	1	68	0.0115
DDEEDEDE	1	69	0.0075
DDEEDEDE	1	70	0.0235
DDEEDEDE	1	71	0.0225
DDEEDEDE	1	72	0.0245
DDEEDEDE	1	73	0.0225
DDEEDEDE	1	74	0.0205
DDEEDEDE	1	75	0.0275
DDEEDEDE	1	76	0.0305
DDEEDEDE	1	77	0.0185
DDEEDEDE	1	78	0.0175
DDEEDEDE	1	79	0.0235
DDEEDEDE	1	80	0.0275
DDEEDEDE	1	81	0.0255
DDEEDEDE	1	82	0.0185
DDEEDEDE	1	83	0.0185
DDEEDEDE	1	84	0.0225
DDEEDEDE	1	85	0.0185
DDEEDEDE	1	86	0.0205
DDEEDEDE	1	87	0.0245
DDEEDEDE	1	88	0.0185
DDEEDEDE	1	89	0.0225
DDEEDEDE	1	90	0.0225
DDEEDEDE	1	91	0.0185
DDEEDEDE	1	92	0.0245
DDEEDEDE	1	93	0.0225
DDEEDEDE	1	94	0.0225
DDEEDEDE	1	95	0.0245
DDEEDEDE	1	96	0.0275
DDEEDEDE	1	97	0.0215
DDEEDEDE	1	98	0.0175
DDEEDEDE	1	99	0.0185
DDEEDEDE	1	100	0.0185
DDEEDEDE	1	101	0.0185
DDEEDEDE	1	102	0.0215
DDEEDEDE	1	103	0.0205
DDEEDEDE	1	104	0.0185
DDEEDEDE	1	105	0.0135
DDEEDEDE	1	106	0.0205
DDEEDEDE	1	107	0.0185
DDEEDEDE	1	108	0.0135
DDEEDEDE	1	109	0.0205
DDEEDEDE	1	110	0.0185
DDEEDEDE	1	111	0.0135
DDEEDEDE	1	112	0.0205
DDEEDEDE	1	113	0.0185
DDEEDEDE	1	114	0.0135
DDEEDEED	1	1	0.0245
DDEEDEED	1	2	0.0255
DDEEDEED	1	3	0.0205
DDEEDEED	1	4	0.0215
DDEEDEED	1	5	0.0255
DDEEDEED	1	6	0.0235
DDEEDEED	1	7	0.0165
DDEEDEED	1	8	0.0185
DDEEDEED	1	9	0.0175
DDEEDEED	1	10	0.0275
DDEEDEED	1	11	0.0245
DDEEDEED	1	12	0.0205
DDEEDEED	1	13	0.0275
DDEEDEED	1	14	0.0305
DDEEDEED	1	15	0.0345
DDEEDEED	1	16	0.0235
DDEEDEED	1	17	0.0325
DDEEDEED	1	18	0.0345
DDEEDEED	1	19	0.0345
DDEEDEED	1	20	0.0265
DDEEDEED	1	21	0.0205
DDEEDEED	1	22	0.0225
DDEEDEED	1	23	0.0245
DDEEDEED	1	24	0.0275
DDEEDEED	1	25	0.0255
DDEEDEED	1	26	0.0275
DDEEDEED	1	27	0.0215
DDEEDEED	1	28	0.0185
DDEEDEED	1	29	0.0285
DDEEDEED	1	30	0.0255
DDEEDEED	1	31	0.0265
DDEEDEED	1	32	0.0225
DDEEDEED	1	33	0.0385
DDEEDEED	1	34	0.0225
DDEEDEED	1	35	0.0245
DDEEDEED	1	36	0.0275
DDEEDEED	1	37	0.0265
DDEEDEED	1	38	0.0255
DDEEDEED	1	39	0.0315
DDEEDEED	1	40	0.0295
DDEEDEED	1	41	0.0255
DDEEDEED	1	42	0.0305
DDEEDEED	1	43	0.0265
DDEEDEED	1	44	0.0285
DDEEDEED	1	45	0.0235
DDEEDEED	1	46	0.0215
DDEEDEED	1	47	0.0315
DDEEDEED	1	48	0.0255
DDEEDEED	1	49	0.0255
DDEEDEED	1	50	0.0265
DDEEDEED	1	51	0.0245
DDEEDEED	1	52	0.0165
DDEEDEED	1	53	0.0215
DDEEDEED	1	54	0.0265
DDEEDEED	1	55	0.0195
DDEEDEED	1	56	0.0175
DDEEDEED	1	57	0.0155
DDEEDEED	1	58	0.0245
DDEEDEED	1	59	0.0375
DDEEDEED	1	60	0.0195
DDEEDEED	1	61	0.0125
DDEEDEED	1	62	0.0235
DDEEDEED	1	63	0.0255
DDEEDEED	1	64	0.0225
DDEEDEED	1	65	0.0195
DDEEDEED	1	66	0.0135
DDEEDEED	1	67	0.0115
DDEEDEED	1	68	0.0115
DDEEDEED	1	69	0.0075
DDEEDEED	1	70	0.0235
DDEEDEED	1	71	0.0225
DDEEDEED	1	72	0.0245
DDEEDEED	1	73	0.0225
DDEEDEED	1	74	0.0205
DDEEDEED	1	75	0.0275
DDEEDEED	1	76	0.0305
DDEEDEED	1	77	0.0185
DDEEDEED	1	78	0.0175
DDEEDEED	1	79	0.0235
DDEEDEED	1	80	0.0275
DDEEDEED	1	81	0.0255
DDEEDEED	1	82	0.0185
DDEEDEED	1	83	0.0185
DDEEDEED	1	84	0.0225
DDEEDEED	1	85	0.0185
DDEEDEED	1	86	0.0205
DDEEDEED	1	87	0.0245
DDEEDEED	1	88	0.0185
DDEEDEED	1	89	0.0225
DDEEDEED	1	90	0.0225
DDEEDEED	1	91	0.0185
DDEEDEED	1	92	0.0245
DDEEDEED	1	93	0.0225
DDEEDEED	1	94	0.0225
DDEEDEED	1	95	0.0245
DDEEDEED	1	96	0.0275
DDEEDEED	1	97	0.0215
DDEEDEED	1	98	0.0175
DDEEDEED	1	99	0.0185
DDEEDEED	1	100	0.0185
DDEEDEED	1	101	0.0185
DDEEDEED	1	102	0.0215
DDEEDEED	1	103	0.0205
DDEEDEED	1	104	0.0185
DDEEDEED	1	105	0.0135
DDEEDEED	1	106	0.0205
DDEEDEED	1	107	0.0185
DDEEDEED	1	108	0.0135
DDEEDEED	1	109	0.0205
DDEEDEED	1	110	0.0185
DDEEDEED	1	111	0.0135
DDEEDEED	1	112	0.0205
DDEEDEED	1	113	0.0185
DDEEDEED	1	114	0.0135
DDEEEDDE	1	1	0.0245
DDEEEDDE	1	2	0.0255
DDEEEDDE	1	3	0.0205
DDEEEDDE	1	4	0.0215
DDEEEDDE	1	5	0.0255
DDEEEDDE	1	6	0.0235
DDEEEDDE	1	7	0.0165
DDEEEDDE	1	8	0.0185
DDEEEDDE	1	9	0.0175
DDEEEDDE	1	10	0.0275
DDEEEDDE	1	11	0.0245
DDEEEDDE	1	12	0.0205
DDEEEDDE	1	13	0.0275
DDEEEDDE	1	14	0.0305
DDEEEDDE	1	15	0.0345
DDEEEDDE	1	16	0.0235
DDEEEDDE	1	17	0.0325
DDEEEDDE	1	18	0.0345
DDEEEDDE	1	19	0.0345
DDEEEDDE	1	20	0.0265
DDEEEDDE	1	21	0.0205
DDEEEDDE	1	22	0.0225
DDEEEDDE	1	23	0.0245
DDEEEDDE	1	24	0.0275
DDEEEDDE	1	25	0.0255
DDEEEDDE	1	26	0.0275
DDEEEDDE	1	27	0.0215
DDEEEDDE	1	28	0.0185
DDEEEDDE	1	29	0.0285
DDEEEDDE	1	30	0.0255
DDEEEDDE	1	31	0.0265
DDEEEDDE	1	32	0.0225
DDEEEDDE	1	33	0.0385
DDEEEDDE	1	34	0.0225
DDEEEDDE	1	35	0.0245
DDEEEDDE	1	36	0.0275
DDEEEDDE	1	37	0.0265
DDEEEDDE	1	38	0.0255
DDEEEDDE	1	39	0.0315
DDEEEDDE	1	40	0.0295
DDEEEDDE	1	41	0.0255
DDEEEDDE	1	42	0.0305
DDEEEDDE	1	43	0.0265
DDEEEDDE	1	44	0.0285
DDEEEDDE	1	45	0.0235
DDEEEDDE	1	46	0.0215
DDEEEDDE	1	47	0.0315
DDEEEDDE	1	48	0.0255
DDEEEDDE	1	49	0.0255
DDEEEDDE	1	50	0.0265
DDEEEDDE	1	51	0.0245
DDEEEDDE	1	52	0.0165
DDEEEDDE	1	53	0.0215
DDEEEDDE	1	54	0.0265
DDEEEDDE	1	55	0.0195
DDEEEDDE	1	56	0.0175
DDEEEDDE	1	57	0.0155
DDEEEDDE	1	58	0.0245
DDEEEDDE	1	59	0.0375
DDEEEDDE	1	60	0.0195
DDEEEDDE	1	61	0.0125
DDEEEDDE	1	62	0.0235
DDEEEDDE	1	63	0.0255
DDEEEDDE	1	64	0.0225
DDEEEDDE	1	65	0.0195
DDEEEDDE	1	66	0.0135
DDEEEDDE	1	67	0.0115
DDEEEDDE	1	68	0.0115
DDEEEDDE	1	69	0.0075
DDEEEDDE	1	70	0.0235
DDEEEDDE	1	71	0.0225
DDEEEDDE	1	72	0.0245
DDEEEDDE	1	73	0.0225
DDEEEDDE	1	74	0.0205
DDEEEDDE	1	75	0.0275
DDEEEDDE	1	76	0.0305
DDEEEDDE	1	77	0.0185
DDEEEDDE	1	78	0.0175
DDEEEDDE	1	79	0.0235
DDEEEDDE	1	80	0.0275
DDEEEDDE	1	81	0.0255
DDEEEDDE	1	82	0.0185
DDEEEDDE	1	83	0.0185
DDEEEDDE	1	84	0.0225
DDEEEDDE	1	85	0.0185
DDEEEDDE	1	86	0.0205
DDEEEDDE	1	87	0.0245
DDEEEDDE	1	88	0.0185
DDEEEDDE	1	89	0.0225
DDEEEDDE	1	90	0.0225
DDEEEDDE	1	91	0.0185
DDEEEDDE	1	92	0.0245
DDEEEDDE	1	93	0.0225
DDEEEDDE	1	94	0.0225
DDEEEDDE	1	95	0.0245
DDEEEDDE	1	96	0.0275
DDEEEDDE	1	97	0.0215
DDEEEDDE	1	98	0.0175
DDEEEDDE	1	99	0.0185
DDEEEDDE	1	100	0.0185
DDEEEDDE	1	101	0.0185
DDEEEDDE	1	102	0.0215
DDEEEDDE	1	103	0.0205
DDEEEDDE	1	104	0.0185
DDEEEDDE	1	105	0.0135
DDEEEDDE	1	106	0.0205
DDEEEDDE	1	107	0.0185
DDEEEDDE	1	108	0.0135
DDEEEDDE	1	109	0.0205
DDEEEDDE	1	110	0.0185
DDEEEDDE	1	111	0.0135
DDEEEDDE	1	112	0.0205
DDEEEDDE	1	113	0.0185
DDEEEDDE	1	114	0.0135
DDEEEDED	1	1	0.0245
DDEEEDED	1	2	0.0255
DDEEEDED	1	3	0.0205
DDEEEDED	1	4	0.0215
DDEEEDED	1	5	0.0255
DDEEEDED	1	6	0.0235
DDEEEDED	1	7	0.0165
DDEEEDED	1	8	0.0185
DDEEEDED	1	9	0.0175
DDEEEDED	1	10	0.0275
DDEEEDED	1	11	0.0245
DDEEEDED	1	12	0.0205
DDEEEDED	1	13	0.0275
DDEEEDED	1	14	0.0305
DDEEEDED	1	15	0.0345
DDEEEDED	1	16	0.0235
DDEEEDED	1	17	0.0325
DDEEEDED	1	18	0.0345
DDEEEDED	1	19	0.0345
DDEEEDED	1	20	0.0265
DDEEEDED	1	21	0.0205
DDEEEDED	1	22	0.0225
DDEEEDED	1	23	0.0245
DDEEEDED	1	24	0.0275
DDEEEDED	1	25	0.0255
DDEEEDED	1	26	0.0275
DDEEEDED	1	27	0.0215
DDEEEDED	1	28	0.0185
DDEEEDED	1	29	0.0285
DDEEEDED	1	30	0.0255
DDEEEDED	1	31	0.0265
DDEEEDED	1	32	0.0225
DDEEEDED	1	33	0.0385
DDEEEDED	1	34	0.0225
DDEEEDED	1	35	0.0245
DDEEEDED	1	36	0.0275
DDEEEDED	1	37	0.0265
DDEEEDED	1	38	0.0255
DDEEEDED	1	39	0.0315
DDEEEDED	1	40	0.0295
DDEEEDED	1	41	0.0255
DDEEEDED	1	42	0.0305
DDEEEDED	1	43	0.0265
DDEEEDED	1	44	0.0285
DDEEEDED	1	45	0.0235
DDEEEDED	1	46	0.0215
DDEEEDED	1	47	0.0315
DDEEEDED	1	48	0.0255
DDEEEDED	1	49	0.0255
DDEEEDED	1	50	0.0265
DDEEEDED	1	51	0.0245
DDEEEDED	1	52	0.0165
DDEEEDED	1	53	0.0215
DDEEEDED	1	54	0.0265
DDEEEDED	1	55	0.0195
DDEEEDED	1	56	0.0175
DDEEEDED	1	57	0.0155
DDEEEDED	1	58	0.0245
DDEEEDED	1	59	0.0375
DDEEEDED	1	60	0.0195
DDEEEDED	1	61	0.0125
DDEEEDED	1	62	0.0235
DDEEEDED	1	63	0.0255
DDEEEDED	1	64	0.0225
DDEEEDED	1	65	0.0195
DDEEEDED	1	66	0.0135
DDEEEDED	1	67	0.0115
DDEEEDED	1	68	0.0115
DDEEEDED	1	69	0.0075
DDEEEDED	1	70	0.0235
DDEEEDED	1	71	0.0225
DDEEEDED	1	72	0.0245
DDEEEDED	1	73	0.0225
DDEEEDED	1	74	0.0205
DDEEEDED	1	75	0.0275
DDEEEDED	1	76	0.0305
DDEEEDED	1	77	0.0185
DDEEEDED	1	78	0.0175
DDEEEDED	1	79	0.0235
DDEEEDED	1	80	0.0275
DDEEEDED	1	81	0.0255
DDEEEDED	1	82	0.0185
DDEEEDED	1	83	0.0185
DDEEEDED	1	84	0.0225
DDEEEDED	1	85	0.0185
DDEEEDED	1	86	0.0205
DDEEEDED	1	87	0.0245
DDEEEDED	1	88	0.0185
DDEEEDED	1	89	0.0225
DDEEEDED	1	90	0.0225
DDEEEDED	1	91	0.0185
DDEEEDED	1	92	0.0245
DDEEEDED	1	93	0.0225
DDEEEDED	1	94	0.0225
DDEEEDED	1	95	0.0245
DDEEEDED	1	96	0.0275
DDEEEDED	1	97	0.0215
DDEEEDED	1	98	0.0175
DDEEEDED	1	99	0.0185
DDEEEDED	1	100	0.0185
DDEEEDED	1	101	0.0185
DDEEEDED	1	102	0.0215
DDEEEDED	1	103	0.0205
DDEEEDED	1	104	0.0185
DDEEEDED	1	105	0.0135
DDEEEDED	1	106	0.0205
DDEEEDED	1	107	0.0185
DDEEEDED	1	108	0.0135
DDEEEDED	1	109	0.0205
DDEEEDED	1	110	0.0185
DDEEEDED	1	111	0.0135
DDEEEDED	1	112	0.0205
DDEEEDED	1	113	0.0185
DDEEEDED	1	114	0.0135
DDEEEEDD	1	1	0.029
DDEEEEDD	1	2	0.03
DDEEEEDD	1	3	0.025
DDEEEEDD	1	4	0.026
DDEEEEDD	1	5	0.03
DDEEEEDD	1	6	0.028
DDEEEEDD	1	7	0.021
DDEEEEDD	1	8	0.023
DDEEEEDD	1	9	0.022
DDEEEEDD	1	10	0.032
DDEEEEDD	1	11	0.029
DDEEEEDD	1	12	0.025
DDEEEEDD	1	13	0.032
DDEEEEDD	1	14	0.035
DDEEEEDD	1	15	0.039
DDEEEEDD	1	16	0.028
DDEEEEDD	1	17	0.037
DDEEEEDD	1	18	0.039
DDEEEEDD	1	19	0.039
DDEEEEDD	1	20	0.031
DDEEEEDD	1	21	0.025
DDEEEEDD	1	22	0.027
DDEEEEDD	1	23	0.029
DDEEEEDD	1	24	0.032
DDEEEEDD	1	25	0.03
DDEEEEDD	1	26	0.032
DDEEEEDD	1	27	0.026
DDEEEEDD	1	28	0.023
DDEEEEDD	1	29	0.033
DDEEEEDD	1	30	0.03
DDEEEEDD	1	31	0.031
DDEEEEDD	1	32	0.027
DDEEEEDD	1	33	0.043
DDEEEEDD	1	34	0.027
DDEEEEDD	1	35	0.029
DDEEEEDD	1	36	0.032
DDEEEEDD	1	37	0.031
DDEEEEDD	1	38	0.03
DDEEEEDD	1	39	0.036
DDEEEEDD	1	40	0.034
DDEEEEDD	1	41	0.03
DDEEEEDD	1	42	0.035
DDEEEEDD	1	43	0.031
DDEEEEDD	1	44	0.033
DDEEEEDD	1	45	0.028
DDEEEEDD	1	46	0.026
DDEEEEDD	1	47	0.036
DDEEEEDD	1	48	0.03
DDEEEEDD	1	49	0.03
DDEEEEDD	1	50	0.031
DDEEEEDD	1	51	0.029
DDEEEEDD	1	52	0.021
DDEEEEDD	1	53	0.026
DDEEEEDD	1	54	0.031
DDEEEEDD	1	55	0.024
DDEEEEDD	1	56	0.022
DDEEEEDD	1	57	0.02
DDEEEEDD	1	58	0.029
DDEEEEDD	1	59	0.042
DDEEEEDD	1	60	0.024
DDEEEEDD	1	61	0.017
DDEEEEDD	1	62	0.028
DDEEEEDD	1	63	0.03
DDEEEEDD	1	64	0.027
DDEEEEDD	1	65	0.024
DDEEEEDD	1	66	0.018
DDEEEEDD	1	67	0.016
DDEEEEDD	1	68	0.016
DDEEEEDD	1	69	0.012
DDEEEEDD	1	70	0.028
DDEEEEDD	1	71	0.027
DDEEEEDD	1	72	0.029
DDEEEEDD	1	73	0.027
DDEEEEDD	1	74	0.025
DDEEEEDD	1	75	0.032
DDEEEEDD	1	76	0.035
DDEEEEDD	1	77	0.023
DDEEEEDD	1	78	0.022
DDEEEEDD	1	79	0.028
DDEEEEDD	1	80	0.032
DDEEEEDD	1	81	0.03
DDEEEEDD	1	82	0.023
DDEEEEDD	1	83	0.023
DDEEEEDD	1	84	0.027
DDEEEEDD	1	85	0.023
DDEEEEDD	1	86	0.025
DDEEEEDD	1	87	0.029
DDEEEEDD	1	88	0.023
DDEEEEDD	1	89	0.027
DDEEEEDD	1	90	0.027
DDEEEEDD	1	91	0.023
DDEEEEDD	1	92	0.029
DDEEEEDD	1	93	0.027
DDEEEEDD	1	94	0.027
DDEEEEDD	1	95	0.029
DDEEEEDD	1	96	0.032
DDEEEEDD	1	97	0.026
DDEEEEDD	1	98	0.022
DDEEEEDD	1	99	0.023
DDEEEEDD	1	100	0.023
DDEEEEDD	1	101	0.023
DDEEEEDD	1	102	0.026
DDEEEEDD	1	103	0.025
DDEEEEDD	1	104	0.023
DDEEEEDD	1	105	0.018
DDEEEEDD	1	106	0.025
DDEEEEDD	1	107	0.023
DDEEEEDD	1	108	0.018
DDEEEEDD	1	109	0.025
DDEEEEDD	1	110	0.023
DDEEEEDD	1	111	0.018
DDEEEEDD	1	112	0.025
DDEEEEDD	1	113	0.023
DDEEEEDD	1	114	0.018
DEDDDEEE	1	1	0.0245
DEDDDEEE	1	2	0.0255
DEDDDEEE	1	3	0.0205
DEDDDEEE	1	4	0.0215
DEDDDEEE	1	5	0.0255
DEDDDEEE	1	6	0.0235
DEDDDEEE	1	7	0.0165
DEDDDEEE	1	8	0.0185
DEDDDEEE	1	9	0.0175
DEDDDEEE	1	10	0.0275
DEDDDEEE	1	11	0.0245
DEDDDEEE	1	12	0.0205
DEDDDEEE	1	13	0.0275
DEDDDEEE	1	14	0.0305
DEDDDEEE	1	15	0.0345
DEDDDEEE	1	16	0.0235
DEDDDEEE	1	17	0.0325
DEDDDEEE	1	18	0.0345
DEDDDEEE	1	19	0.0345
DEDDDEEE	1	20	0.0265
DEDDDEEE	1	21	0.0205
DEDDDEEE	1	22	0.0225
DEDDDEEE	1	23	0.0245
DEDDDEEE	1	24	0.0275
DEDDDEEE	1	25	0.0255
DEDDDEEE	1	26	0.0275
DEDDDEEE	1	27	0.0215
DEDDDEEE	1	28	0.0185
DEDDDEEE	1	29	0.0285
DEDDDEEE	1	30	0.0255
DEDDDEEE	1	31	0.0265
DEDDDEEE	1	32	0.0225
DEDDDEEE	1	33	0.0385
DEDDDEEE	1	34	0.0225
DEDDDEEE	1	35	0.0245
DEDDDEEE	1	36	0.0275
DEDDDEEE	1	37	0.0265
DEDDDEEE	1	38	0.0255
DEDDDEEE	1	39	0.0315
DEDDDEEE	1	40	0.0295
DEDDDEEE	1	41	0.0255
DEDDDEEE	1	42	0.0305
DEDDDEEE	1	43	0.0265
DEDDDEEE	1	44	0.0285
DEDDDEEE	1	45	0.0235
DEDDDEEE	1	46	0.0215
DEDDDEEE	1	47	0.0315
DEDDDEEE	1	48	0.0255
DEDDDEEE	1	49	0.0255
DEDDDEEE	1	50	0.0265
DEDDDEEE	1	51	0.0245
DEDDDEEE	1	52	0.0165
DEDDDEEE	1	53	0.0215
DEDDDEEE	1	54	0.0265
DEDDDEEE	1	55	0.0195
DEDDDEEE	1	56	0.0175
DEDDDEEE	1	57	0.0155
DEDDDEEE	1	58	0.0245
DEDDDEEE	1	59	0.0375
DEDDDEEE	1	60	0.0195
DEDDDEEE	1	61	0.0125
DEDDDEEE	1	62	0.0235
DEDDDEEE	1	63	0.0255
DEDDDEEE	1	64	0.0225
DEDDDEEE	1	65	0.0195
DEDDDEEE	1	66	0.0135
DEDDDEEE	1	67	0.0115
DEDDDEEE	1	68	0.0115
DEDDDEEE	1	69	0.0075
DEDDDEEE	1	70	0.0235
DEDDDEEE	1	71	0.0225
DEDDDEEE	1	72	0.0245
DEDDDEEE	1	73	0.0225
DEDDDEEE	1	74	0.0205
DEDDDEEE	1	75	0.0275
DEDDDEEE	1	76	0.0305
DEDDDEEE	1	77	0.0185
DEDDDEEE	1	78	0.0175
DEDDDEEE	1	79	0.0235
DEDDDEEE	1	80	0.0275
DEDDDEEE	1	81	0.0255
DEDDDEEE	1	82	0.0185
DEDDDEEE	1	83	0.0185
DEDDDEEE	1	84	0.0225
DEDDDEEE	1	85	0.0185
DEDDDEEE	1	86	0.0205
DEDDDEEE	1	87	0.0245
DEDDDEEE	1	88	0.0185
DEDDDEEE	1	89	0.0225
DEDDDEEE	1	90	0.0225
DEDDDEEE	1	91	0.0185
DEDDDEEE	1	92	0.0245
DEDDDEEE	1	93	0.0225
DEDDDEEE	1	94	0.0225
DEDDDEEE	1	95	0.0245
DEDDDEEE	1	96	0.0275
DEDDDEEE	1	97	0.0215
DEDDDEEE	1	98	0.0175
DEDDDEEE	1	99	0.0185
DEDDDEEE	1	100	0.0185
DEDDDEEE	1	101	0.0185
DEDDDEEE	1	102	0.0215
DEDDDEEE	1	103	0.0205
DEDDDEEE	1	104	0.0185
DEDDDEEE	1	105	0.0135
DEDDDEEE	1	106	0.0205
DEDDDEEE	1	107	0.0185
DEDDDEEE	1	108	0.0135
DEDDDEEE	1	109	0.0205
DEDDDEEE	1	110	0.0185
DEDDDEEE	1	111	0.0135
DEDDDEEE	1	112	0.0205
DEDDDEEE	1	113	0.0185
DEDDDEEE	1	114	0.0135
DEDDEDEE	1	1	0.0245
DEDDEDEE	1	2	0.0255
DEDDEDEE	1	3	0.0205
DEDDEDEE	1	4	0.0215
DEDDEDEE	1	5	0.0255
DEDDEDEE	1	6	0.0235
DEDDEDEE	1	7	0.0165
DEDDEDEE	1	8	0.0185
DEDDEDEE	1	9	0.0175
DEDDEDEE	1	10	0.0275
DEDDEDEE	1	11	0.0245
DEDDEDEE	1	12	0.0205
DEDDEDEE	1	13	0.0275
DEDDEDEE	1	14	0.0305
DEDDEDEE	1	15	0.0345
DEDDEDEE	1	16	0.0235
DEDDEDEE	1	17	0.0325
DEDDEDEE	1	18	0.0345
DEDDEDEE	1	19	0.0345
DEDDEDEE	1	20	0.0265
DEDDEDEE	1	21	0.0205
DEDDEDEE	1	22	0.0225
DEDDEDEE	1	23	0.0245
DEDDEDEE	1	24	0.0275
DEDDEDEE	1	25	0.0255
DEDDEDEE	1	26	0.0275
DEDDEDEE	1	27	0.0215
DEDDEDEE	1	28	0.0185
DEDDEDEE	1	29	0.0285
DEDDEDEE	1	30	0.0255
DEDDEDEE	1	31	0.0265
DEDDEDEE	1	32	0.0225
DEDDEDEE	1	33	0.0385
DEDDEDEE	1	34	0.0225
DEDDEDEE	1	35	0.0245
DEDDEDEE	1	36	0.0275
DEDDEDEE	1	37	0.0265
DEDDEDEE	1	38	0.0255
DEDDEDEE	1	39	0.0315
DEDDEDEE	1	40	0.0295
DEDDEDEE	1	41	0.0255
DEDDEDEE	1	42	0.0305
DEDDEDEE	1	43	0.0265
DEDDEDEE	1	44	0.0285
DEDDEDEE	1	45	0.0235
DEDDEDEE	1	46	0.0215
DEDDEDEE	1	47	0.0315
DEDDEDEE	1	48	0.0255
DEDDEDEE	1	49	0.0255
DEDDEDEE	1	50	0.0265
DEDDEDEE	1	51	0.0245
DEDDEDEE	1	52	0.0165
DEDDEDEE	1	53	0.0215
DEDDEDEE	1	54	0.0265
DEDDEDEE	1	55	0.0195
DEDDEDEE	1	56	0.0175
DEDDEDEE	1	57	0.0155
DEDDEDEE	1	58	0.0245
DEDDEDEE	1	59	0.0375
DEDDEDEE	1	60	0.0195
DEDDEDEE	1	61	0.0125
[truncated: 14,937 more rows]

## Sheet: FigureS10
Treatment	Season	Replicate	Value
CONTROL	1	1	0.076
CONTROL	1	2	0.071
CONTROL	1	3	0.076
CONTROL	1	4	0.096
CONTROL	1	5	0.091
CONTROL	1	6	0.1
CONTROL	1	7	0.092
CONTROL	1	8	0.087
CONTROL	1	9	0.085
CONTROL	2	1	0.081
CONTROL	2	2	0.072
CONTROL	2	3	0.075
CONTROL	2	4	0.084
CONTROL	2	5	0.088
CONTROL	2	6	0.096
CONTROL	2	7	0.074
CONTROL	2	8	0.07
CONTROL	2	9	0.071
CONTROL	3	1	0.083
CONTROL	3	2	0.11
CONTROL	3	3	0.11
CONTROL	3	4	0.146
CONTROL	3	5	0.139
CONTROL	3	6	0.158
CONTROL	3	7	0.083
CONTROL	3	8	0.081
CONTROL	3	9	0.076
CONTROL	4	1	0.068
CONTROL	4	2	0.071
CONTROL	4	3	0.066
CONTROL	4	4	0.217
CONTROL	4	5	0.21
CONTROL	4	6	0.222
CONTROL	4	7	0.084
CONTROL	4	8	0.091
CONTROL	4	9	0.089
CONTROL	5	1	0.104
CONTROL	5	2	0.101
CONTROL	5	3	0.102
CONTROL	5	4	0.219
CONTROL	5	5	0.226
CONTROL	5	6	0.222
CONTROL	5	7	0.099
CONTROL	5	8	0.114
CONTROL	5	9	0.11
CONTROL	6	1	0.135
CONTROL	6	2	0.125
CONTROL	6	3	0.166
CONTROL	6	4	0.213
CONTROL	6	5	0.22
CONTROL	6	6	0.218
CONTROL	6	7	0.096
CONTROL	6	8	0.098
CONTROL	6	9	0.101
CONTROL	7	1	0.196
CONTROL	7	2	0.203
CONTROL	7	3	0.211
CONTROL	7	4	0.211
CONTROL	7	5	0.217
CONTROL	7	6	0.214
CONTROL	7	7	0.108
CONTROL	7	8	0.13
CONTROL	7	9	0.127
CONTROL	8	1	0.215
CONTROL	8	2	0.218
CONTROL	8	3	0.22
CONTROL	8	4	0.209
CONTROL	8	5	0.21
CONTROL	8	6	0.209
CONTROL	8	7	0.177
CONTROL	8	8	0.18
CONTROL	8	9	0.181
EEEEEEEE	1	1	0.03
EEEEEEEE	1	2	0.045
EEEEEEEE	1	3	0.025
EEEEEEEE	1	4	0.028
EEEEEEEE	1	5	0.031
EEEEEEEE	1	6	0.029
EEEEEEEE	1	7	0.028
EEEEEEEE	1	8	0.024
EEEEEEEE	1	9	0.026
EEEEEEEE	1	10	0.029
EEEEEEEE	1	11	0.027
EEEEEEEE	1	12	0.033
EEEEEEEE	1	13	0.033
EEEEEEEE	1	14	0.028
EEEEEEEE	1	15	0.029
EEEEEEEE	1	16	0.024
EEEEEEEE	1	17	0.03
EEEEEEEE	1	18	0.028
EEEEEEEE	1	19	0.026
EEEEEEEE	1	20	0.032
EEEEEEEE	1	21	0.025
EEEEEEEE	1	22	0.029
EEEEEEEE	1	23	0.032
EEEEEEEE	1	24	0.029
EEEEEEEE	1	25	0.032
EEEEEEEE	1	26	0.03
EEEEEEEE	1	27	0.033
EEEEEEEE	1	28	0.026
EEEEEEEE	1	29	0.027
EEEEEEEE	1	30	0.038
EEEEEEEE	1	31	0.03
EEEEEEEE	1	32	0.03
EEEEEEEE	1	33	0.034
EEEEEEEE	1	34	0.03
EEEEEEEE	1	35	0.033
EEEEEEEE	1	36	0.035
EEEEEEEE	1	37	0.027
EEEEEEEE	1	38	0.031
EEEEEEEE	1	39	0.032
EEEEEEEE	1	40	0.025
EEEEEEEE	1	41	0.023
EEEEEEEE	1	42	0.028
EEEEEEEE	1	43	0.023
EEEEEEEE	1	44	0.03
EEEEEEEE	1	45	0.027
EEEEEEEE	1	46	0.03
EEEEEEEE	1	47	0.028
EEEEEEEE	1	48	0.028
EEEEEEEE	1	49	0.03
EEEEEEEE	1	50	0.026
EEEEEEEE	1	51	0.03
EEEEEEEE	1	52	0.03
EEEEEEEE	1	53	0.022
EEEEEEEE	1	54	0.028
EEEEEEEE	1	55	0.029
EEEEEEEE	1	56	0.031
EEEEEEEE	1	57	0.035
EEEEEEEE	1	58	0.028
EEEEEEEE	1	59	0.025
EEEEEEEE	1	60	0.025
EEEEEEEE	1	61	0.027
EEEEEEEE	1	62	0.029
EEEEEEEE	1	63	0.029
EEEEEEEE	1	64	0.025
EEEEEEEE	1	65	0.027
EEEEEEEE	1	66	0.026
EEEEEEEE	1	67	0.023
EEEEEEEE	1	68	0.024
EEEEEEEE	1	69	0.031
EEEEEEEE	1	70	0.022
EEEEEEEE	1	71	0.021
EEEEEEEE	1	72	0.021
EEEEEEEE	1	73	0.018
EEEEEEEE	1	74	0.021
EEEEEEEE	1	75	0.02
EEEEEEEE	1	76	0.018
EEEEEEEE	1	77	0.021
EEEEEEEE	1	78	0.017
EEEEEEEE	1	79	0.027
EEEEEEEE	1	80	0.028
EEEEEEEE	1	81	0.028
EEEEEEEE	1	82	0.025
EEEEEEEE	1	83	0.028
EEEEEEEE	1	84	0.024
EEEEEEEE	1	85	0.025
EEEEEEEE	1	86	0.023
EEEEEEEE	1	87	0.023
EEEEEEEE	1	88	0.022
EEEEEEEE	1	89	0.019
EEEEEEEE	1	90	0.018
EEEEEEEE	1	91	0.024
EEEEEEEE	1	92	0.025
EEEEEEEE	1	93	0.028
EEEEEEEE	1	94	0.027
EEEEEEEE	1	95	0.024
EEEEEEEE	1	96	0.021
EEEEEEEE	1	97	0.021
EEEEEEEE	1	98	0.022
EEEEEEEE	1	99	0.022
EEEEEEEE	1	100	0.017
EEEEEEEE	1	101	0.015
EEEEEEEE	1	102	0.015
EEEEEEEE	1	103	0.025
EEEEEEEE	1	104	0.022
EEEEEEEE	1	105	0.021
EEEEEEEE	1	106	0.016
EEEEEEEE	1	107	0.03
EEEEEEEE	1	108	0.021
EEEEEEEE	1	109	0.016
EEEEEEEE	1	110	0.03
EEEEEEEE	1	111	0.021
EEEEEEEE	1	112	0.016
EEEEEEEE	1	113	0.03
EEEEEEEE	1	114	0.021
EEEEEEEE	2	1	0.014
EEEEEEEE	2	2	0.011
EEEEEEEE	2	3	0.015
EEEEEEEE	2	4	0.012
EEEEEEEE	2	5	0.012
EEEEEEEE	2	6	0.017
EEEEEEEE	2	7	0.011
EEEEEEEE	2	8	0.011
EEEEEEEE	2	9	0.013
EEEEEEEE	2	10	0.015
EEEEEEEE	2	11	0.013
EEEEEEEE	2	12	0.012
EEEEEEEE	2	13	0.016
EEEEEEEE	2	14	0.025
EEEEEEEE	2	15	0.019
EEEEEEEE	2	16	0.008
EEEEEEEE	2	17	0.008
EEEEEEEE	2	18	0.008
EEEEEEEE	2	19	0.008
EEEEEEEE	2	20	0.01
EEEEEEEE	2	21	0.011
EEEEEEEE	2	22	0.008
EEEEEEEE	2	23	0.009
EEEEEEEE	2	24	0.005
EEEEEEEE	2	25	0.012
EEEEEEEE	2	26	0.009
EEEEEEEE	2	27	0.008
EEEEEEEE	2	28	0.009
EEEEEEEE	2	29	0.01
EEEEEEEE	2	30	0.01
EEEEEEEE	2	31	0.009
EEEEEEEE	2	32	0.008
EEEEEEEE	2	33	0.007
EEEEEEEE	2	34	0.013
EEEEEEEE	2	35	0.007
EEEEEEEE	2	36	0.012
EEEEEEEE	2	37	0.013
EEEEEEEE	2	38	0.009
EEEEEEEE	2	39	0.012
EEEEEEEE	2	40	0.008
EEEEEEEE	2	41	0.01
EEEEEEEE	2	42	0.008
EEEEEEEE	2	43	0.01
EEEEEEEE	2	44	0.009
EEEEEEEE	2	45	0.006
EEEEEEEE	2	46	0.006
EEEEEEEE	2	47	0.005
EEEEEEEE	2	48	0.005
EEEEEEEE	2	49	0.043
EEEEEEEE	2	50	0.047
EEEEEEEE	2	51	0.04
EEEEEEEE	3	1	0.003
EEEEEEEE	3	2	0
EEEEEEEE	3	3	0
EEEEEEEE	3	4	0
EEEEEEEE	3	5	0.001
EEEEEEEE	3	6	0.001
EEEEEEEE	3	7	0
EEEEEEEE	3	8	0
EEEEEEEE	3	9	0
EEEEEEEE	3	10	0.001
EEEEEEEE	3	11	0.001
EEEEEEEE	3	12	0.001
EEEEEEEE	3	13	0.002
EEEEEEEE	3	14	0.001
EEEEEEEE	3	15	0
EEEEEEEE	3	16	0
EEEEEEEE	3	17	0
EEEEEEEE	3	18	-0.001
EEEEEEEE	4	1	0
EEEEEEEE	4	2	0.003
EEEEEEEE	4	3	0
EEEEEEEE	4	4	0
EEEEEEEE	4	5	0.001
EEEEEEEE	4	6	-0.001
EEEEEEEE	5	1	0.014
EEEEEEEE	5	2	0.016
EEEEEEEE	5	3	0.007
EEEEEEEE	6	1	0.023
EEEEEEEE	6	2	0.029
EEEEEEEE	6	3	0.02
EEEEEEEE	7	1	0.037
EEEEEEEE	7	2	0.044
EEEEEEEE	7	3	0.039
EEEEEEEE	8	1	0.043
EEEEEEEE	8	2	0.058
EEEEEEEE	8	3	0.056
EEEEDDDD	1	1	0.03
EEEEDDDD	1	2	0.045
EEEEDDDD	1	3	0.025
EEEEDDDD	1	4	0.028
EEEEDDDD	1	5	0.031
EEEEDDDD	1	6	0.029
EEEEDDDD	1	7	0.028
EEEEDDDD	1	8	0.024
EEEEDDDD	1	9	0.026
EEEEDDDD	1	10	0.029
EEEEDDDD	1	11	0.027
EEEEDDDD	1	12	0.033
EEEEDDDD	1	13	0.033
EEEEDDDD	1	14	0.028
EEEEDDDD	1	15	0.029
EEEEDDDD	1	16	0.024
EEEEDDDD	1	17	0.03
EEEEDDDD	1	18	0.028
EEEEDDDD	1	19	0.026
EEEEDDDD	1	20	0.032
EEEEDDDD	1	21	0.025
EEEEDDDD	1	22	0.029
EEEEDDDD	1	23	0.032
EEEEDDDD	1	24	0.029
EEEEDDDD	1	25	0.032
EEEEDDDD	1	26	0.03
EEEEDDDD	1	27	0.033
EEEEDDDD	1	28	0.026
EEEEDDDD	1	29	0.027
EEEEDDDD	1	30	0.038
EEEEDDDD	1	31	0.03
EEEEDDDD	1	32	0.03
EEEEDDDD	1	33	0.034
EEEEDDDD	1	34	0.03
EEEEDDDD	1	35	0.033
EEEEDDDD	1	36	0.035
EEEEDDDD	1	37	0.027
EEEEDDDD	1	38	0.031
EEEEDDDD	1	39	0.032
EEEEDDDD	1	40	0.025
EEEEDDDD	1	41	0.023
EEEEDDDD	1	42	0.028
EEEEDDDD	1	43	0.023
EEEEDDDD	1	44	0.03
EEEEDDDD	1	45	0.027
EEEEDDDD	1	46	0.03
EEEEDDDD	1	47	0.028
EEEEDDDD	1	48	0.028
EEEEDDDD	1	49	0.03
EEEEDDDD	1	50	0.026
EEEEDDDD	1	51	0.03
EEEEDDDD	1	52	0.03
EEEEDDDD	1	53	0.022
EEEEDDDD	1	54	0.028
EEEEDDDD	1	55	0.029
EEEEDDDD	1	56	0.031
EEEEDDDD	1	57	0.035
EEEEDDDD	1	58	0.028
EEEEDDDD	1	59	0.025
EEEEDDDD	1	60	0.025
EEEEDDDD	1	61	0.027
EEEEDDDD	1	62	0.029
EEEEDDDD	1	63	0.029
EEEEDDDD	1	64	0.025
EEEEDDDD	1	65	0.027
EEEEDDDD	1	66	0.026
EEEEDDDD	1	67	0.023
EEEEDDDD	1	68	0.024
EEEEDDDD	1	69	0.031
EEEEDDDD	1	70	0.022
EEEEDDDD	1	71	0.021
EEEEDDDD	1	72	0.021
EEEEDDDD	1	73	0.018
EEEEDDDD	1	74	0.021
EEEEDDDD	1	75	0.02
EEEEDDDD	1	76	0.018
EEEEDDDD	1	77	0.021
EEEEDDDD	1	78	0.017
EEEEDDDD	1	79	0.027
EEEEDDDD	1	80	0.028
EEEEDDDD	1	81	0.028
EEEEDDDD	1	82	0.025
EEEEDDDD	1	83	0.028
EEEEDDDD	1	84	0.024
EEEEDDDD	1	85	0.025
EEEEDDDD	1	86	0.023
EEEEDDDD	1	87	0.023
EEEEDDDD	1	88	0.022
EEEEDDDD	1	89	0.019
EEEEDDDD	1	90	0.018
EEEEDDDD	1	91	0.024
EEEEDDDD	1	92	0.025
EEEEDDDD	1	93	0.028
EEEEDDDD	1	94	0.027
EEEEDDDD	1	95	0.024
EEEEDDDD	1	96	0.021
EEEEDDDD	1	97	0.021
EEEEDDDD	1	98	0.022
EEEEDDDD	1	99	0.022
EEEEDDDD	1	100	0.017
EEEEDDDD	1	101	0.015
EEEEDDDD	1	102	0.015
EEEEDDDD	1	103	0.025
EEEEDDDD	1	104	0.022
EEEEDDDD	1	105	0.021
EEEEDDDD	1	106	0.016
EEEEDDDD	1	107	0.03
EEEEDDDD	1	108	0.021
EEEEDDDD	1	109	0.016
EEEEDDDD	1	110	0.03
EEEEDDDD	1	111	0.021
EEEEDDDD	1	112	0.016
EEEEDDDD	1	113	0.03
EEEEDDDD	1	114	0.021
EEEEDDDD	2	1	0.014
EEEEDDDD	2	2	0.011
EEEEDDDD	2	3	0.015
EEEEDDDD	2	4	0.012
EEEEDDDD	2	5	0.012
EEEEDDDD	2	6	0.017
EEEEDDDD	2	7	0.011
EEEEDDDD	2	8	0.011
EEEEDDDD	2	9	0.013
EEEEDDDD	2	10	0.015
EEEEDDDD	2	11	0.013
EEEEDDDD	2	12	0.012
EEEEDDDD	2	13	0.016
EEEEDDDD	2	14	0.025
EEEEDDDD	2	15	0.019
EEEEDDDD	2	16	0.008
EEEEDDDD	2	17	0.008
EEEEDDDD	2	18	0.008
EEEEDDDD	2	19	0.008
EEEEDDDD	2	20	0.01
EEEEDDDD	2	21	0.011
EEEEDDDD	2	22	0.008
EEEEDDDD	2	23	0.009
EEEEDDDD	2	24	0.005
EEEEDDDD	2	25	0.012
EEEEDDDD	2	26	0.009
EEEEDDDD	2	27	0.008
EEEEDDDD	2	28	0.009
EEEEDDDD	2	29	0.01
EEEEDDDD	2	30	0.01
EEEEDDDD	2	31	0.009
EEEEDDDD	2	32	0.008
EEEEDDDD	2	33	0.007
EEEEDDDD	2	34	0.013
EEEEDDDD	2	35	0.007
EEEEDDDD	2	36	0.012
EEEEDDDD	2	37	0.013
EEEEDDDD	2	38	0.009
EEEEDDDD	2	39	0.012
EEEEDDDD	2	40	0.008
EEEEDDDD	2	41	0.01
EEEEDDDD	2	42	0.008
EEEEDDDD	2	43	0.01
EEEEDDDD	2	44	0.009
EEEEDDDD	2	45	0.006
EEEEDDDD	2	46	0.006
EEEEDDDD	2	47	0.005
EEEEDDDD	2	48	0.005
EEEEDDDD	2	49	0.043
EEEEDDDD	2	50	0.047
EEEEDDDD	2	51	0.04
EEEEDDDD	3	1	0.003
EEEEDDDD	3	2	0
EEEEDDDD	3	3	0
EEEEDDDD	3	4	0
EEEEDDDD	3	5	0.001
EEEEDDDD	3	6	0.001
EEEEDDDD	3	7	0
EEEEDDDD	3	8	0
EEEEDDDD	3	9	0
EEEEDDDD	3	10	0.001
EEEEDDDD	3	11	0.001
EEEEDDDD	3	12	0.001
EEEEDDDD	3	13	0.002
EEEEDDDD	3	14	0.001
EEEEDDDD	3	15	0
EEEEDDDD	3	16	0
EEEEDDDD	3	17	0
EEEEDDDD	3	18	-0.001
EEEEDDDD	4	1	0
EEEEDDDD	4	2	0.003
EEEEDDDD	4	3	0
EEEEDDDD	4	4	0
EEEEDDDD	4	5	0.001
EEEEDDDD	4	6	-0.001
EEEEDDDD	5	1	0.013
EEEEDDDD	5	2	0.017
EEEEDDDD	5	3	0.014
EEEEDDDD	6	1	0.013
EEEEDDDD	6	2	0.017
EEEEDDDD	6	3	0.014
EEEEDDDD	7	1	0.036
EEEEDDDD	7	2	0.036
EEEEDDDD	7	3	0.031
EEEEDDDD	8	1	0.071
EEEEDDDD	8	2	0.073
EEEEDDDD	8	3	0.067
EEEDEDDD	1	1	0.03
EEEDEDDD	1	2	0.045
EEEDEDDD	1	3	0.025
EEEDEDDD	1	4	0.028
EEEDEDDD	1	5	0.031
EEEDEDDD	1	6	0.029
EEEDEDDD	1	7	0.028
EEEDEDDD	1	8	0.024
EEEDEDDD	1	9	0.026
EEEDEDDD	1	10	0.029
EEEDEDDD	1	11	0.027
EEEDEDDD	1	12	0.033
EEEDEDDD	1	13	0.033
EEEDEDDD	1	14	0.028
EEEDEDDD	1	15	0.029
EEEDEDDD	1	16	0.024
EEEDEDDD	1	17	0.03
EEEDEDDD	1	18	0.028
EEEDEDDD	1	19	0.026
EEEDEDDD	1	20	0.032
EEEDEDDD	1	21	0.025
EEEDEDDD	1	22	0.029
EEEDEDDD	1	23	0.032
EEEDEDDD	1	24	0.029
EEEDEDDD	1	25	0.032
EEEDEDDD	1	26	0.03
EEEDEDDD	1	27	0.033
EEEDEDDD	1	28	0.026
EEEDEDDD	1	29	0.027
EEEDEDDD	1	30	0.038
EEEDEDDD	1	31	0.03
EEEDEDDD	1	32	0.03
EEEDEDDD	1	33	0.034
EEEDEDDD	1	34	0.03
EEEDEDDD	1	35	0.033
EEEDEDDD	1	36	0.035
EEEDEDDD	1	37	0.027
EEEDEDDD	1	38	0.031
EEEDEDDD	1	39	0.032
EEEDEDDD	1	40	0.025
EEEDEDDD	1	41	0.023
EEEDEDDD	1	42	0.028
EEEDEDDD	1	43	0.023
EEEDEDDD	1	44	0.03
EEEDEDDD	1	45	0.027
EEEDEDDD	1	46	0.03
EEEDEDDD	1	47	0.028
EEEDEDDD	1	48	0.028
EEEDEDDD	1	49	0.03
EEEDEDDD	1	50	0.026
EEEDEDDD	1	51	0.03
EEEDEDDD	1	52	0.03
EEEDEDDD	1	53	0.022
EEEDEDDD	1	54	0.028
EEEDEDDD	1	55	0.029
EEEDEDDD	1	56	0.031
EEEDEDDD	1	57	0.035
EEEDEDDD	1	58	0.028
EEEDEDDD	1	59	0.025
EEEDEDDD	1	60	0.025
EEEDEDDD	1	61	0.027
EEEDEDDD	1	62	0.029
EEEDEDDD	1	63	0.029
EEEDEDDD	1	64	0.025
EEEDEDDD	1	65	0.027
EEEDEDDD	1	66	0.026
EEEDEDDD	1	67	0.023
EEEDEDDD	1	68	0.024
EEEDEDDD	1	69	0.031
EEEDEDDD	1	70	0.022
EEEDEDDD	1	71	0.021
EEEDEDDD	1	72	0.021
EEEDEDDD	1	73	0.018
EEEDEDDD	1	74	0.021
EEEDEDDD	1	75	0.02
EEEDEDDD	1	76	0.018
EEEDEDDD	1	77	0.021
EEEDEDDD	1	78	0.017
EEEDEDDD	1	79	0.027
EEEDEDDD	1	80	0.028
EEEDEDDD	1	81	0.028
EEEDEDDD	1	82	0.025
EEEDEDDD	1	83	0.028
EEEDEDDD	1	84	0.024
EEEDEDDD	1	85	0.025
EEEDEDDD	1	86	0.023
EEEDEDDD	1	87	0.023
EEEDEDDD	1	88	0.022
EEEDEDDD	1	89	0.019
EEEDEDDD	1	90	0.018
EEEDEDDD	1	91	0.024
EEEDEDDD	1	92	0.025
EEEDEDDD	1	93	0.028
EEEDEDDD	1	94	0.027
EEEDEDDD	1	95	0.024
EEEDEDDD	1	96	0.021
EEEDEDDD	1	97	0.021
EEEDEDDD	1	98	0.022
EEEDEDDD	1	99	0.022
EEEDEDDD	1	100	0.017
EEEDEDDD	1	101	0.015
EEEDEDDD	1	102	0.015
EEEDEDDD	1	103	0.025
EEEDEDDD	1	104	0.022
EEEDEDDD	1	105	0.021
EEEDEDDD	1	106	0.016
EEEDEDDD	1	107	0.03
EEEDEDDD	1	108	0.021
EEEDEDDD	1	109	0.016
EEEDEDDD	1	110	0.03
EEEDEDDD	1	111	0.021
EEEDEDDD	1	112	0.016
EEEDEDDD	1	113	0.03
EEEDEDDD	1	114	0.021
EEEDEDDD	2	1	0.014
EEEDEDDD	2	2	0.011
EEEDEDDD	2	3	0.015
EEEDEDDD	2	4	0.012
EEEDEDDD	2	5	0.012
EEEDEDDD	2	6	0.017
EEEDEDDD	2	7	0.011
EEEDEDDD	2	8	0.011
EEEDEDDD	2	9	0.013
EEEDEDDD	2	10	0.015
EEEDEDDD	2	11	0.013
EEEDEDDD	2	12	0.012
EEEDEDDD	2	13	0.016
EEEDEDDD	2	14	0.025
EEEDEDDD	2	15	0.019
EEEDEDDD	2	16	0.008
EEEDEDDD	2	17	0.008
EEEDEDDD	2	18	0.008
EEEDEDDD	2	19	0.008
EEEDEDDD	2	20	0.01
EEEDEDDD	2	21	0.011
EEEDEDDD	2	22	0.008
EEEDEDDD	2	23	0.009
EEEDEDDD	2	24	0.005
EEEDEDDD	2	25	0.012
EEEDEDDD	2	26	0.009
EEEDEDDD	2	27	0.008
EEEDEDDD	2	28	0.009
EEEDEDDD	2	29	0.01
EEEDEDDD	2	30	0.01
EEEDEDDD	2	31	0.009
EEEDEDDD	2	32	0.008
EEEDEDDD	2	33	0.007
EEEDEDDD	2	34	0.013
EEEDEDDD	2	35	0.007
EEEDEDDD	2	36	0.012
EEEDEDDD	2	37	0.013
EEEDEDDD	2	38	0.009
EEEDEDDD	2	39	0.012
EEEDEDDD	2	40	0.008
EEEDEDDD	2	41	0.01
EEEDEDDD	2	42	0.008
EEEDEDDD	2	43	0.01
EEEDEDDD	2	44	0.009
EEEDEDDD	2	45	0.006
EEEDEDDD	2	46	0.006
EEEDEDDD	2	47	0.005
EEEDEDDD	2	48	0.005
EEEDEDDD	2	49	0.043
EEEDEDDD	2	50	0.047
EEEDEDDD	2	51	0.04
EEEDEDDD	3	1	0.003
EEEDEDDD	3	2	0
EEEDEDDD	3	3	0
EEEDEDDD	3	4	0
EEEDEDDD	3	5	0.001
EEEDEDDD	3	6	0.001
EEEDEDDD	3	7	0
EEEDEDDD	3	8	0
EEEDEDDD	3	9	0
EEEDEDDD	3	10	0.001
EEEDEDDD	3	11	0.001
EEEDEDDD	3	12	0.001
EEEDEDDD	3	13	0.002
EEEDEDDD	3	14	0.001
EEEDEDDD	3	15	0
EEEDEDDD	3	16	0
EEEDEDDD	3	17	0
EEEDEDDD	3	18	-0.001
EEEDEDDD	4	1	-0.002
EEEDEDDD	4	2	0
EEEDEDDD	4	3	0
EEEDEDDD	4	4	0
EEEDEDDD	4	5	0.001
EEEDEDDD	4	6	0
EEEDEDDD	4	7	-0.001
EEEDEDDD	4	8	0
EEEDEDDD	4	9	-0.003
EEEDEDDD	4	10	0.002
EEEDEDDD	4	11	0.001
EEEDEDDD	5	1	0.009
EEEDEDDD	5	2	0.009
EEEDEDDD	6	1	0.017
EEEDEDDD	6	2	0.013
EEEDEDDD	7	1	0.041
EEEDEDDD	7	2	0.03
EEEDEDDD	8	1	0.088
EEEDEDDD	8	2	0.062
EEEDDEDD	1	1	0.03
EEEDDEDD	1	2	0.045
EEEDDEDD	1	3	0.025
EEEDDEDD	1	4	0.028
EEEDDEDD	1	5	0.031
EEEDDEDD	1	6	0.029
EEEDDEDD	1	7	0.028
EEEDDEDD	1	8	0.024
EEEDDEDD	1	9	0.026
EEEDDEDD	1	10	0.029
EEEDDEDD	1	11	0.027
EEEDDEDD	1	12	0.033
EEEDDEDD	1	13	0.033
EEEDDEDD	1	14	0.028
EEEDDEDD	1	15	0.029
EEEDDEDD	1	16	0.024
EEEDDEDD	1	17	0.03
EEEDDEDD	1	18	0.028
EEEDDEDD	1	19	0.026
EEEDDEDD	1	20	0.032
EEEDDEDD	1	21	0.025
EEEDDEDD	1	22	0.029
EEEDDEDD	1	23	0.032
EEEDDEDD	1	24	0.029
EEEDDEDD	1	25	0.032
EEEDDEDD	1	26	0.03
EEEDDEDD	1	27	0.033
EEEDDEDD	1	28	0.026
EEEDDEDD	1	29	0.027
EEEDDEDD	1	30	0.038
EEEDDEDD	1	31	0.03
EEEDDEDD	1	32	0.03
EEEDDEDD	1	33	0.034
EEEDDEDD	1	34	0.03
EEEDDEDD	1	35	0.033
EEEDDEDD	1	36	0.035
EEEDDEDD	1	37	0.027
EEEDDEDD	1	38	0.031
EEEDDEDD	1	39	0.032
EEEDDEDD	1	40	0.025
EEEDDEDD	1	41	0.023
EEEDDEDD	1	42	0.028
EEEDDEDD	1	43	0.023
EEEDDEDD	1	44	0.03
EEEDDEDD	1	45	0.027
EEEDDEDD	1	46	0.03
EEEDDEDD	1	47	0.028
EEEDDEDD	1	48	0.028
EEEDDEDD	1	49	0.03
EEEDDEDD	1	50	0.026
EEEDDEDD	1	51	0.03
EEEDDEDD	1	52	0.03
EEEDDEDD	1	53	0.022
EEEDDEDD	1	54	0.028
EEEDDEDD	1	55	0.029
EEEDDEDD	1	56	0.031
EEEDDEDD	1	57	0.035
EEEDDEDD	1	58	0.028
EEEDDEDD	1	59	0.025
EEEDDEDD	1	60	0.025
EEEDDEDD	1	61	0.027
EEEDDEDD	1	62	0.029
EEEDDEDD	1	63	0.029
EEEDDEDD	1	64	0.025
EEEDDEDD	1	65	0.027
EEEDDEDD	1	66	0.026
EEEDDEDD	1	67	0.023
EEEDDEDD	1	68	0.024
EEEDDEDD	1	69	0.031
EEEDDEDD	1	70	0.022
EEEDDEDD	1	71	0.021
EEEDDEDD	1	72	0.021
EEEDDEDD	1	73	0.018
EEEDDEDD	1	74	0.021
EEEDDEDD	1	75	0.02
EEEDDEDD	1	76	0.018
EEEDDEDD	1	77	0.021
EEEDDEDD	1	78	0.017
EEEDDEDD	1	79	0.027
EEEDDEDD	1	80	0.028
EEEDDEDD	1	81	0.028
EEEDDEDD	1	82	0.025
EEEDDEDD	1	83	0.028
EEEDDEDD	1	84	0.024
EEEDDEDD	1	85	0.025
EEEDDEDD	1	86	0.023
EEEDDEDD	1	87	0.023
EEEDDEDD	1	88	0.022
EEEDDEDD	1	89	0.019
EEEDDEDD	1	90	0.018
EEEDDEDD	1	91	0.024
EEEDDEDD	1	92	0.025
EEEDDEDD	1	93	0.028
EEEDDEDD	1	94	0.027
EEEDDEDD	1	95	0.024
EEEDDEDD	1	96	0.021
EEEDDEDD	1	97	0.021
EEEDDEDD	1	98	0.022
EEEDDEDD	1	99	0.022
EEEDDEDD	1	100	0.017
EEEDDEDD	1	101	0.015
EEEDDEDD	1	102	0.015
EEEDDEDD	1	103	0.025
EEEDDEDD	1	104	0.022
EEEDDEDD	1	105	0.021
EEEDDEDD	1	106	0.016
EEEDDEDD	1	107	0.03
EEEDDEDD	1	108	0.021
EEEDDEDD	1	109	0.016
EEEDDEDD	1	110	0.03
EEEDDEDD	1	111	0.021
EEEDDEDD	1	112	0.016
EEEDDEDD	1	113	0.03
EEEDDEDD	1	114	0.021
EEEDDEDD	2	1	0.014
EEEDDEDD	2	2	0.011
EEEDDEDD	2	3	0.015
EEEDDEDD	2	4	0.012
EEEDDEDD	2	5	0.012
EEEDDEDD	2	6	0.017
EEEDDEDD	2	7	0.011
EEEDDEDD	2	8	0.011
EEEDDEDD	2	9	0.013
EEEDDEDD	2	10	0.015
EEEDDEDD	2	11	0.013
EEEDDEDD	2	12	0.012
EEEDDEDD	2	13	0.016
EEEDDEDD	2	14	0.025
EEEDDEDD	2	15	0.019
EEEDDEDD	2	16	0.008
EEEDDEDD	2	17	0.008
EEEDDEDD	2	18	0.008
EEEDDEDD	2	19	0.008
EEEDDEDD	2	20	0.01
EEEDDEDD	2	21	0.011
EEEDDEDD	2	22	0.008
EEEDDEDD	2	23	0.009
EEEDDEDD	2	24	0.005
EEEDDEDD	2	25	0.012
EEEDDEDD	2	26	0.009
EEEDDEDD	2	27	0.008
EEEDDEDD	2	28	0.009
EEEDDEDD	2	29	0.01
EEEDDEDD	2	30	0.01
EEEDDEDD	2	31	0.009
EEEDDEDD	2	32	0.008
EEEDDEDD	2	33	0.007
EEEDDEDD	2	34	0.013
EEEDDEDD	2	35	0.007
EEEDDEDD	2	36	0.012
EEEDDEDD	2	37	0.013
EEEDDEDD	2	38	0.009
EEEDDEDD	2	39	0.012
EEEDDEDD	2	40	0.008
EEEDDEDD	2	41	0.01
EEEDDEDD	2	42	0.008
EEEDDEDD	2	43	0.01
EEEDDEDD	2	44	0.009
EEEDDEDD	2	45	0.006
EEEDDEDD	2	46	0.006
EEEDDEDD	2	47	0.005
EEEDDEDD	2	48	0.005
EEEDDEDD	2	49	0.043
EEEDDEDD	2	50	0.047
EEEDDEDD	2	51	0.04
EEEDDEDD	3	1	0.003
EEEDDEDD	3	2	0
EEEDDEDD	3	3	0
EEEDDEDD	3	4	0
EEEDDEDD	3	5	0.001
EEEDDEDD	3	6	0.001
EEEDDEDD	3	7	0
EEEDDEDD	3	8	0
EEEDDEDD	3	9	0
EEEDDEDD	3	10	0.001
EEEDDEDD	3	11	0.001
EEEDDEDD	3	12	0.001
EEEDDEDD	3	13	0.002
EEEDDEDD	3	14	0.001
EEEDDEDD	3	15	0
EEEDDEDD	3	16	0
EEEDDEDD	3	17	0
EEEDDEDD	3	18	-0.001
EEEDDEDD	4	1	-0.002
EEEDDEDD	4	2	0
EEEDDEDD	4	3	0
EEEDDEDD	4	4	0
EEEDDEDD	4	5	0.001
EEEDDEDD	4	6	0
EEEDDEDD	4	7	-0.001
EEEDDEDD	4	8	0
EEEDDEDD	4	9	-0.003
EEEDDEDD	4	10	0.002
EEEDDEDD	4	11	0.001
EEEDDEDD	5	1	-0.001
EEEDDEDD	5	2	0.001
EEEDDEDD	5	3	0.001
EEEDDEDD	5	4	0
EEEDDEDD	5	5	0.007
EEEDDEDD	5	6	0.004
EEEDDEDD	5	7	-0.002
EEEDDEDD	5	8	0.003
EEEDDEDD	5	9	0.006
EEEDDEDD	6	1	0
EEEDDEDD	6	2	0.001
EEEDDEDD	6	3	0.003
EEEDDEDD	7	1	0
EEEDDEDD	7	2	0.01
EEEDDEDD	7	3	0.018
EEEDDEDD	8	1	0.027
EEEDDEDD	8	2	0.035
EEEDDEDD	8	3	0.046
EEEDDDED	1	1	0.03
EEEDDDED	1	2	0.045
EEEDDDED	1	3	0.025
EEEDDDED	1	4	0.028
EEEDDDED	1	5	0.031
EEEDDDED	1	6	0.029
EEEDDDED	1	7	0.028
EEEDDDED	1	8	0.024
EEEDDDED	1	9	0.026
EEEDDDED	1	10	0.029
EEEDDDED	1	11	0.027
EEEDDDED	1	12	0.033
EEEDDDED	1	13	0.033
EEEDDDED	1	14	0.028
EEEDDDED	1	15	0.029
EEEDDDED	1	16	0.024
EEEDDDED	1	17	0.03
EEEDDDED	1	18	0.028
EEEDDDED	1	19	0.026
EEEDDDED	1	20	0.032
EEEDDDED	1	21	0.025
EEEDDDED	1	22	0.029
EEEDDDED	1	23	0.032
EEEDDDED	1	24	0.029
EEEDDDED	1	25	0.032
EEEDDDED	1	26	0.03
EEEDDDED	1	27	0.033
EEEDDDED	1	28	0.026
EEEDDDED	1	29	0.027
EEEDDDED	1	30	0.038
EEEDDDED	1	31	0.03
EEEDDDED	1	32	0.03
EEEDDDED	1	33	0.034
EEEDDDED	1	34	0.03
EEEDDDED	1	35	0.033
EEEDDDED	1	36	0.035
EEEDDDED	1	37	0.027
EEEDDDED	1	38	0.031
EEEDDDED	1	39	0.032
EEEDDDED	1	40	0.025
EEEDDDED	1	41	0.023
EEEDDDED	1	42	0.028
EEEDDDED	1	43	0.023
EEEDDDED	1	44	0.03
EEEDDDED	1	45	0.027
EEEDDDED	1	46	0.03
EEEDDDED	1	47	0.028
EEEDDDED	1	48	0.028
EEEDDDED	1	49	0.03
EEEDDDED	1	50	0.026
EEEDDDED	1	51	0.03
EEEDDDED	1	52	0.03
EEEDDDED	1	53	0.022
EEEDDDED	1	54	0.028
EEEDDDED	1	55	0.029
EEEDDDED	1	56	0.031
EEEDDDED	1	57	0.035
EEEDDDED	1	58	0.028
EEEDDDED	1	59	0.025
EEEDDDED	1	60	0.025
EEEDDDED	1	61	0.027
EEEDDDED	1	62	0.029
EEEDDDED	1	63	0.029
EEEDDDED	1	64	0.025
EEEDDDED	1	65	0.027
EEEDDDED	1	66	0.026
EEEDDDED	1	67	0.023
EEEDDDED	1	68	0.024
EEEDDDED	1	69	0.031
EEEDDDED	1	70	0.022
EEEDDDED	1	71	0.021
EEEDDDED	1	72	0.021
EEEDDDED	1	73	0.018
EEEDDDED	1	74	0.021
EEEDDDED	1	75	0.02
EEEDDDED	1	76	0.018
EEEDDDED	1	77	0.021
EEEDDDED	1	78	0.017
EEEDDDED	1	79	0.027
EEEDDDED	1	80	0.028
EEEDDDED	1	81	0.028
EEEDDDED	1	82	0.025
EEEDDDED	1	83	0.028
EEEDDDED	1	84	0.024
EEEDDDED	1	85	0.025
EEEDDDED	1	86	0.023
EEEDDDED	1	87	0.023
EEEDDDED	1	88	0.022
EEEDDDED	1	89	0.019
EEEDDDED	1	90	0.018
EEEDDDED	1	91	0.024
EEEDDDED	1	92	0.025
EEEDDDED	1	93	0.028
EEEDDDED	1	94	0.027
EEEDDDED	1	95	0.024
EEEDDDED	1	96	0.021
EEEDDDED	1	97	0.021
EEEDDDED	1	98	0.022
EEEDDDED	1	99	0.022
EEEDDDED	1	100	0.017
EEEDDDED	1	101	0.015
EEEDDDED	1	102	0.015
EEEDDDED	1	103	0.025
EEEDDDED	1	104	0.022
EEEDDDED	1	105	0.021
EEEDDDED	1	106	0.016
EEEDDDED	1	107	0.03
EEEDDDED	1	108	0.021
EEEDDDED	1	109	0.016
EEEDDDED	1	110	0.03
EEEDDDED	1	111	0.021
EEEDDDED	1	112	0.016
EEEDDDED	1	113	0.03
EEEDDDED	1	114	0.021
EEEDDDED	2	1	0.014
EEEDDDED	2	2	0.011
EEEDDDED	2	3	0.015
EEEDDDED	2	4	0.012
EEEDDDED	2	5	0.012
EEEDDDED	2	6	0.017
EEEDDDED	2	7	0.011
EEEDDDED	2	8	0.011
EEEDDDED	2	9	0.013
EEEDDDED	2	10	0.015
EEEDDDED	2	11	0.013
EEEDDDED	2	12	0.012
EEEDDDED	2	13	0.016
EEEDDDED	2	14	0.025
EEEDDDED	2	15	0.019
EEEDDDED	2	16	0.008
EEEDDDED	2	17	0.008
EEEDDDED	2	18	0.008
EEEDDDED	2	19	0.008
EEEDDDED	2	20	0.01
EEEDDDED	2	21	0.011
EEEDDDED	2	22	0.008
EEEDDDED	2	23	0.009
EEEDDDED	2	24	0.005
EEEDDDED	2	25	0.012
EEEDDDED	2	26	0.009
EEEDDDED	2	27	0.008
EEEDDDED	2	28	0.009
EEEDDDED	2	29	0.01
EEEDDDED	2	30	0.01
EEEDDDED	2	31	0.009
EEEDDDED	2	32	0.008
EEEDDDED	2	33	0.007
EEEDDDED	2	34	0.013
EEEDDDED	2	35	0.007
EEEDDDED	2	36	0.012
EEEDDDED	2	37	0.013
EEEDDDED	2	38	0.009
EEEDDDED	2	39	0.012
EEEDDDED	2	40	0.008
EEEDDDED	2	41	0.01
EEEDDDED	2	42	0.008
EEEDDDED	2	43	0.01
EEEDDDED	2	44	0.009
EEEDDDED	2	45	0.006
EEEDDDED	2	46	0.006
EEEDDDED	2	47	0.005
EEEDDDED	2	48	0.005
EEEDDDED	2	49	0.043
EEEDDDED	2	50	0.047
EEEDDDED	2	51	0.04
EEEDDDED	3	1	0.003
EEEDDDED	3	2	0
EEEDDDED	3	3	0
EEEDDDED	3	4	0
EEEDDDED	3	5	0.001
EEEDDDED	3	6	0.001
EEEDDDED	3	7	0
EEEDDDED	3	8	0
EEEDDDED	3	9	0
EEEDDDED	3	10	0.001
EEEDDDED	3	11	0.001
EEEDDDED	3	12	0.001
EEEDDDED	3	13	0.002
EEEDDDED	3	14	0.001
EEEDDDED	3	15	0
EEEDDDED	3	16	0
EEEDDDED	3	17	0
EEEDDDED	3	18	-0.001
EEEDDDED	4	1	-0.002
EEEDDDED	4	2	0
EEEDDDED	4	3	0
EEEDDDED	4	4	0
EEEDDDED	4	5	0.001
EEEDDDED	4	6	0
EEEDDDED	4	7	-0.001
EEEDDDED	4	8	0
EEEDDDED	4	9	-0.003
EEEDDDED	4	10	0.002
EEEDDDED	4	11	0.001
EEEDDDED	5	1	-0.001
EEEDDDED	5	2	0.001
EEEDDDED	5	3	0.001
EEEDDDED	5	4	0
EEEDDDED	5	5	0.007
EEEDDDED	5	6	0.004
EEEDDDED	5	7	-0.002
EEEDDDED	5	8	0.003
EEEDDDED	5	9	0.006
EEEDDDED	6	1	0.002
EEEDDDED	6	2	0.006
EEEDDDED	6	3	0.004
EEEDDDED	6	4	0
EEEDDDED	6	5	0.005
EEEDDDED	6	6	0.01
EEEDDDED	7	1	0.003
EEEDDDED	7	2	0.021
EEEDDDED	7	3	0.038
EEEDDDED	8	1	0.028
EEEDDDED	8	2	0.073
EEEDDDED	8	3	0.101
EEEDDDDE	1	1	0.03
EEEDDDDE	1	2	0.045
EEEDDDDE	1	3	0.025
EEEDDDDE	1	4	0.028
EEEDDDDE	1	5	0.031
EEEDDDDE	1	6	0.029
EEEDDDDE	1	7	0.028
EEEDDDDE	1	8	0.024
EEEDDDDE	1	9	0.026
EEEDDDDE	1	10	0.029
EEEDDDDE	1	11	0.027
EEEDDDDE	1	12	0.033
EEEDDDDE	1	13	0.033
EEEDDDDE	1	14	0.028
EEEDDDDE	1	15	0.029
EEEDDDDE	1	16	0.024
EEEDDDDE	1	17	0.03
EEEDDDDE	1	18	0.028
EEEDDDDE	1	19	0.026
EEEDDDDE	1	20	0.032
EEEDDDDE	1	21	0.025
EEEDDDDE	1	22	0.029
EEEDDDDE	1	23	0.032
EEEDDDDE	1	24	0.029
EEEDDDDE	1	25	0.032
EEEDDDDE	1	26	0.03
EEEDDDDE	1	27	0.033
EEEDDDDE	1	28	0.026
EEEDDDDE	1	29	0.027
EEEDDDDE	1	30	0.038
EEEDDDDE	1	31	0.03
EEEDDDDE	1	32	0.03
EEEDDDDE	1	33	0.034
EEEDDDDE	1	34	0.03
EEEDDDDE	1	35	0.033
EEEDDDDE	1	36	0.035
EEEDDDDE	1	37	0.027
EEEDDDDE	1	38	0.031
EEEDDDDE	1	39	0.032
EEEDDDDE	1	40	0.025
EEEDDDDE	1	41	0.023
EEEDDDDE	1	42	0.028
EEEDDDDE	1	43	0.023
EEEDDDDE	1	44	0.03
EEEDDDDE	1	45	0.027
EEEDDDDE	1	46	0.03
EEEDDDDE	1	47	0.028
EEEDDDDE	1	48	0.028
EEEDDDDE	1	49	0.03
EEEDDDDE	1	50	0.026
EEEDDDDE	1	51	0.03
EEEDDDDE	1	52	0.03
EEEDDDDE	1	53	0.022
EEEDDDDE	1	54	0.028
EEEDDDDE	1	55	0.029
EEEDDDDE	1	56	0.031
EEEDDDDE	1	57	0.035
EEEDDDDE	1	58	0.028
EEEDDDDE	1	59	0.025
EEEDDDDE	1	60	0.025
EEEDDDDE	1	61	0.027
EEEDDDDE	1	62	0.029
EEEDDDDE	1	63	0.029
EEEDDDDE	1	64	0.025
EEEDDDDE	1	65	0.027
EEEDDDDE	1	66	0.026
EEEDDDDE	1	67	0.023
EEEDDDDE	1	68	0.024
EEEDDDDE	1	69	0.031
EEEDDDDE	1	70	0.022
EEEDDDDE	1	71	0.021
EEEDDDDE	1	72	0.021
EEEDDDDE	1	73	0.018
EEEDDDDE	1	74	0.021
EEEDDDDE	1	75	0.02
EEEDDDDE	1	76	0.018
EEEDDDDE	1	77	0.021
EEEDDDDE	1	78	0.017
EEEDDDDE	1	79	0.027
EEEDDDDE	1	80	0.028
EEEDDDDE	1	81	0.028
EEEDDDDE	1	82	0.025
EEEDDDDE	1	83	0.028
EEEDDDDE	1	84	0.024
EEEDDDDE	1	85	0.025
EEEDDDDE	1	86	0.023
EEEDDDDE	1	87	0.023
EEEDDDDE	1	88	0.022
EEEDDDDE	1	89	0.019
EEEDDDDE	1	90	0.018
EEEDDDDE	1	91	0.024
EEEDDDDE	1	92	0.025
EEEDDDDE	1	93	0.028
EEEDDDDE	1	94	0.027
EEEDDDDE	1	95	0.024
EEEDDDDE	1	96	0.021
EEEDDDDE	1	97	0.021
EEEDDDDE	1	98	0.022
EEEDDDDE	1	99	0.022
EEEDDDDE	1	100	0.017
EEEDDDDE	1	101	0.015
EEEDDDDE	1	102	0.015
EEEDDDDE	1	103	0.025
EEEDDDDE	1	104	0.022
EEEDDDDE	1	105	0.021
EEEDDDDE	1	106	0.016
EEEDDDDE	1	107	0.03
EEEDDDDE	1	108	0.021
EEEDDDDE	1	109	0.016
EEEDDDDE	1	110	0.03
EEEDDDDE	1	111	0.021
EEEDDDDE	1	112	0.016
EEEDDDDE	1	113	0.03
EEEDDDDE	1	114	0.021
EEEDDDDE	2	1	0.014
EEEDDDDE	2	2	0.011
EEEDDDDE	2	3	0.015
EEEDDDDE	2	4	0.012
EEEDDDDE	2	5	0.012
EEEDDDDE	2	6	0.017
EEEDDDDE	2	7	0.011
EEEDDDDE	2	8	0.011
EEEDDDDE	2	9	0.013
EEEDDDDE	2	10	0.015
EEEDDDDE	2	11	0.013
EEEDDDDE	2	12	0.012
EEEDDDDE	2	13	0.016
EEEDDDDE	2	14	0.025
EEEDDDDE	2	15	0.019
EEEDDDDE	2	16	0.008
EEEDDDDE	2	17	0.008
EEEDDDDE	2	18	0.008
EEEDDDDE	2	19	0.008
EEEDDDDE	2	20	0.01
EEEDDDDE	2	21	0.011
EEEDDDDE	2	22	0.008
EEEDDDDE	2	23	0.009
EEEDDDDE	2	24	0.005
EEEDDDDE	2	25	0.012
EEEDDDDE	2	26	0.009
EEEDDDDE	2	27	0.008
EEEDDDDE	2	28	0.009
EEEDDDDE	2	29	0.01
EEEDDDDE	2	30	0.01
EEEDDDDE	2	31	0.009
EEEDDDDE	2	32	0.008
EEEDDDDE	2	33	0.007
EEEDDDDE	2	34	0.013
EEEDDDDE	2	35	0.007
EEEDDDDE	2	36	0.012
EEEDDDDE	2	37	0.013
EEEDDDDE	2	38	0.009
EEEDDDDE	2	39	0.012
EEEDDDDE	2	40	0.008
EEEDDDDE	2	41	0.01
EEEDDDDE	2	42	0.008
EEEDDDDE	2	43	0.01
EEEDDDDE	2	44	0.009
EEEDDDDE	2	45	0.006
EEEDDDDE	2	46	0.006
EEEDDDDE	2	47	0.005
EEEDDDDE	2	48	0.005
EEEDDDDE	2	49	0.043
EEEDDDDE	2	50	0.047
EEEDDDDE	2	51	0.04
EEEDDDDE	3	1	0.003
EEEDDDDE	3	2	0
EEEDDDDE	3	3	0
EEEDDDDE	3	4	0
EEEDDDDE	3	5	0.001
EEEDDDDE	3	6	0.001
EEEDDDDE	3	7	0
EEEDDDDE	3	8	0
EEEDDDDE	3	9	0
EEEDDDDE	3	10	0.001
EEEDDDDE	3	11	0.001
EEEDDDDE	3	12	0.001
EEEDDDDE	3	13	0.002
EEEDDDDE	3	14	0.001
EEEDDDDE	3	15	0
EEEDDDDE	3	16	0
EEEDDDDE	3	17	0
EEEDDDDE	3	18	-0.001
EEEDDDDE	4	1	-0.002
EEEDDDDE	4	2	0
EEEDDDDE	4	3	0
EEEDDDDE	4	4	0
EEEDDDDE	4	5	0.001
EEEDDDDE	4	6	0
EEEDDDDE	4	7	-0.001
EEEDDDDE	4	8	0
EEEDDDDE	4	9	-0.003
EEEDDDDE	4	10	0.002
EEEDDDDE	4	11	0.001
EEEDDDDE	5	1	-0.001
EEEDDDDE	5	2	0.001
EEEDDDDE	5	3	0.001
EEEDDDDE	5	4	0
EEEDDDDE	5	5	0.007
EEEDDDDE	5	6	0.004
EEEDDDDE	5	7	-0.002
EEEDDDDE	5	8	0.003
EEEDDDDE	5	9	0.006
EEEDDDDE	6	1	0.002
EEEDDDDE	6	2	0.006
EEEDDDDE	6	3	0.004
EEEDDDDE	6	4	0
EEEDDDDE	6	5	0.005
EEEDDDDE	6	6	0.01
EEEDDDDE	7	1	0.001
EEEDDDDE	7	2	0.016
EEEDDDDE	7	3	0.009
EEEDDDDE	8	1	0.013
EEEDDDDE	8	2	0.043
EEEDDDDE	8	3	0.032
EEDEEDDD	1	1	0.03
EEDEEDDD	1	2	0.045
EEDEEDDD	1	3	0.025
EEDEEDDD	1	4	0.028
EEDEEDDD	1	5	0.031
EEDEEDDD	1	6	0.029
EEDEEDDD	1	7	0.028
EEDEEDDD	1	8	0.024
EEDEEDDD	1	9	0.026
EEDEEDDD	1	10	0.029
EEDEEDDD	1	11	0.027
EEDEEDDD	1	12	0.033
EEDEEDDD	1	13	0.033
EEDEEDDD	1	14	0.028
EEDEEDDD	1	15	0.029
EEDEEDDD	1	16	0.024
EEDEEDDD	1	17	0.03
EEDEEDDD	1	18	0.028
EEDEEDDD	1	19	0.026
EEDEEDDD	1	20	0.032
EEDEEDDD	1	21	0.025
EEDEEDDD	1	22	0.029
EEDEEDDD	1	23	0.032
EEDEEDDD	1	24	0.029
EEDEEDDD	1	25	0.032
EEDEEDDD	1	26	0.03
EEDEEDDD	1	27	0.033
EEDEEDDD	1	28	0.026
EEDEEDDD	1	29	0.027
EEDEEDDD	1	30	0.038
EEDEEDDD	1	31	0.03
EEDEEDDD	1	32	0.03
EEDEEDDD	1	33	0.034
EEDEEDDD	1	34	0.03
EEDEEDDD	1	35	0.033
EEDEEDDD	1	36	0.035
EEDEEDDD	1	37	0.027
EEDEEDDD	1	38	0.031
EEDEEDDD	1	39	0.032
EEDEEDDD	1	40	0.025
EEDEEDDD	1	41	0.023
EEDEEDDD	1	42	0.028
EEDEEDDD	1	43	0.023
EEDEEDDD	1	44	0.03
EEDEEDDD	1	45	0.027
EEDEEDDD	1	46	0.03
EEDEEDDD	1	47	0.028
EEDEEDDD	1	48	0.028
EEDEEDDD	1	49	0.03
EEDEEDDD	1	50	0.026
EEDEEDDD	1	51	0.03
EEDEEDDD	1	52	0.03
EEDEEDDD	1	53	0.022
EEDEEDDD	1	54	0.028
EEDEEDDD	1	55	0.029
EEDEEDDD	1	56	0.031
EEDEEDDD	1	57	0.035
EEDEEDDD	1	58	0.028
EEDEEDDD	1	59	0.025
EEDEEDDD	1	60	0.025
EEDEEDDD	1	61	0.027
EEDEEDDD	1	62	0.029
EEDEEDDD	1	63	0.029
EEDEEDDD	1	64	0.025
EEDEEDDD	1	65	0.027
EEDEEDDD	1	66	0.026
EEDEEDDD	1	67	0.023
EEDEEDDD	1	68	0.024
EEDEEDDD	1	69	0.031
EEDEEDDD	1	70	0.022
EEDEEDDD	1	71	0.021
EEDEEDDD	1	72	0.021
EEDEEDDD	1	73	0.018
EEDEEDDD	1	74	0.021
EEDEEDDD	1	75	0.02
EEDEEDDD	1	76	0.018
EEDEEDDD	1	77	0.021
EEDEEDDD	1	78	0.017
EEDEEDDD	1	79	0.027
EEDEEDDD	1	80	0.028
EEDEEDDD	1	81	0.028
EEDEEDDD	1	82	0.025
EEDEEDDD	1	83	0.028
EEDEEDDD	1	84	0.024
EEDEEDDD	1	85	0.025
EEDEEDDD	1	86	0.023
EEDEEDDD	1	87	0.023
EEDEEDDD	1	88	0.022
EEDEEDDD	1	89	0.019
EEDEEDDD	1	90	0.018
EEDEEDDD	1	91	0.024
EEDEEDDD	1	92	0.025
EEDEEDDD	1	93	0.028
EEDEEDDD	1	94	0.027
EEDEEDDD	1	95	0.024
EEDEEDDD	1	96	0.021
EEDEEDDD	1	97	0.021
EEDEEDDD	1	98	0.022
EEDEEDDD	1	99	0.022
EEDEEDDD	1	100	0.017
EEDEEDDD	1	101	0.015
EEDEEDDD	1	102	0.015
EEDEEDDD	1	103	0.025
EEDEEDDD	1	104	0.022
EEDEEDDD	1	105	0.021
EEDEEDDD	1	106	0.016
EEDEEDDD	1	107	0.03
EEDEEDDD	1	108	0.021
EEDEEDDD	1	109	0.016
EEDEEDDD	1	110	0.03
EEDEEDDD	1	111	0.021
EEDEEDDD	1	112	0.016
EEDEEDDD	1	113	0.03
EEDEEDDD	1	114	0.021
EEDEEDDD	2	1	0.014
EEDEEDDD	2	2	0.011
EEDEEDDD	2	3	0.015
EEDEEDDD	2	4	0.012
EEDEEDDD	2	5	0.012
EEDEEDDD	2	6	0.017
EEDEEDDD	2	7	0.011
EEDEEDDD	2	8	0.011
EEDEEDDD	2	9	0.013
EEDEEDDD	2	10	0.015
EEDEEDDD	2	11	0.013
EEDEEDDD	2	12	0.012
EEDEEDDD	2	13	0.016
EEDEEDDD	2	14	0.025
EEDEEDDD	2	15	0.019
EEDEEDDD	2	16	0.008
EEDEEDDD	2	17	0.008
EEDEEDDD	2	18	0.008
EEDEEDDD	2	19	0.008
EEDEEDDD	2	20	0.01
EEDEEDDD	2	21	0.011
EEDEEDDD	2	22	0.008
EEDEEDDD	2	23	0.009
EEDEEDDD	2	24	0.005
EEDEEDDD	2	25	0.012
EEDEEDDD	2	26	0.009
EEDEEDDD	2	27	0.008
EEDEEDDD	2	28	0.009
EEDEEDDD	2	29	0.01
EEDEEDDD	2	30	0.01
EEDEEDDD	2	31	0.009
EEDEEDDD	2	32	0.008
EEDEEDDD	2	33	0.007
EEDEEDDD	2	34	0.013
EEDEEDDD	2	35	0.007
EEDEEDDD	2	36	0.012
EEDEEDDD	2	37	0.013
EEDEEDDD	2	38	0.009
EEDEEDDD	2	39	0.012
EEDEEDDD	2	40	0.008
EEDEEDDD	2	41	0.01
EEDEEDDD	2	42	0.008
EEDEEDDD	2	43	0.01
EEDEEDDD	2	44	0.009
EEDEEDDD	2	45	0.006
EEDEEDDD	2	46	0.006
EEDEEDDD	2	47	0.005
EEDEEDDD	2	48	0.005
EEDEEDDD	2	49	0.043
EEDEEDDD	2	50	0.047
EEDEEDDD	2	51	0.04
EEDEEDDD	3	1	0.007
EEDEEDDD	3	2	0.005
EEDEEDDD	3	3	0.006
EEDEEDDD	3	4	0.007
EEDEEDDD	3	5	0.003
EEDEEDDD	3	6	0.005
EEDEEDDD	3	7	0.005
EEDEEDDD	3	8	0.006
EEDEEDDD	3	9	0.006
EEDEEDDD	3	10	0.006
EEDEEDDD	3	11	0.004
EEDEEDDD	3	12	0.006
EEDEEDDD	3	13	0.006
EEDEEDDD	3	14	0.006
EEDEEDDD	3	15	0.007
EEDEEDDD	3	16	0.002
EEDEEDDD	3	17	0.002
EEDEEDDD	3	18	0
EEDEEDDD	3	19	0.001
EEDEEDDD	3	20	0
EEDEEDDD	3	21	0.001
EEDEEDDD	3	22	0
EEDEEDDD	3	23	0
EEDEEDDD	3	24	-0.002
EEDEEDDD	3	25	0
EEDEEDDD	3	26	0
EEDEEDDD	3	27	0.001
EEDEEDDD	3	28	0
EEDEEDDD	3	29	-0.001
EEDEEDDD	3	30	0
EEDEEDDD	3	31	0.066
EEDEEDDD	3	32	0.062
EEDEEDDD	3	33	0.051
EEDEEDDD	4	1	0.002
EEDEEDDD	4	2	-0.001
EEDEEDDD	4	3	0
EEDEEDDD	4	4	0
EEDEEDDD	4	5	0
EEDEEDDD	4	6	-0.003
EEDEEDDD	4	7	-0.002
EEDEEDDD	4	8	-0.001
EEDEEDDD	4	9	-0.001
EEDEEDDD	4	10	0.175
EEDEEDDD	4	11	0.162
EEDEEDDD	4	12	0.148
EEDEEDDD	5	1	0.002
EEDEEDDD	5	2	0.01
EEDEEDDD	5	3	0.005
EEDEEDDD	6	1	0.006
EEDEEDDD	6	2	0.025
EEDEEDDD	6	3	0.019
EEDEEDDD	7	1	0.016
EEDEEDDD	7	2	0.055
EEDEEDDD	7	3	0.04
EEDEEDDD	8	1	0.053
EEDEEDDD	8	2	0.074
EEDEEDDD	8	3	0.049
EEDEDEDD	1	1	0.035758
EEDEDEDD	1	2	0.051484
EEDEDEDD	1	3	0.030516
EEDEDEDD	1	4	0.033661
EEDEDEDD	1	5	0.036806
EEDEDEDD	1	6	0.03471
EEDEDEDD	1	7	0.033661
EEDEDEDD	1	8	0.029468
EEDEDEDD	1	9	0.031565
EEDEDEDD	1	10	0.03471
EEDEDEDD	1	11	0.032613
EEDEDEDD	1	12	0.038903
EEDEDEDD	1	13	0.038903
EEDEDEDD	1	14	0.033661
EEDEDEDD	1	15	0.03471
EEDEDEDD	1	16	0.029468
EEDEDEDD	1	17	0.035758
EEDEDEDD	1	18	0.033661
EEDEDEDD	1	19	0.031565
EEDEDEDD	1	20	0.037855
EEDEDEDD	1	21	0.030516
EEDEDEDD	1	22	0.03471
EEDEDEDD	1	23	0.037855
EEDEDEDD	1	24	0.03471
EEDEDEDD	1	25	0.037855
EEDEDEDD	1	26	0.035758
EEDEDEDD	1	27	0.038903
EEDEDEDD	1	28	0.031565
EEDEDEDD	1	29	0.032613
EEDEDEDD	1	30	0.044145
EEDEDEDD	1	31	0.035758
EEDEDEDD	1	32	0.035758
EEDEDEDD	1	33	0.039952
EEDEDEDD	1	34	0.035758
EEDEDEDD	1	35	0.038903
EEDEDEDD	1	36	0.041
EEDEDEDD	1	37	0.032613
EEDEDEDD	1	38	0.036806
EEDEDEDD	1	39	0.037855
EEDEDEDD	1	40	0.030516
EEDEDEDD	1	41	0.028419
EEDEDEDD	1	42	0.033661
EEDEDEDD	1	43	0.028419
EEDEDEDD	1	44	0.035758
EEDEDEDD	1	45	0.032613
EEDEDEDD	1	46	0.035758
EEDEDEDD	1	47	0.033661
EEDEDEDD	1	48	0.033661
EEDEDEDD	1	49	0.035758
EEDEDEDD	1	50	0.031565
EEDEDEDD	1	51	0.035758
EEDEDEDD	1	52	0.035758
EEDEDEDD	1	53	0.027371
EEDEDEDD	1	54	0.033661
EEDEDEDD	1	55	0.03471
EEDEDEDD	1	56	0.036806
EEDEDEDD	1	57	0.041
EEDEDEDD	1	58	0.033661
EEDEDEDD	1	59	0.030516
EEDEDEDD	1	60	0.030516
EEDEDEDD	1	61	0.032613
EEDEDEDD	1	62	0.03471
EEDEDEDD	1	63	0.03471
EEDEDEDD	1	64	0.030516
EEDEDEDD	1	65	0.032613
EEDEDEDD	1	66	0.031565
EEDEDEDD	1	67	0.028419
EEDEDEDD	1	68	0.029468
EEDEDEDD	1	69	0.036806
EEDEDEDD	1	70	0.027371
EEDEDEDD	1	71	0.026323
EEDEDEDD	1	72	0.026323
EEDEDEDD	1	73	0.023177
EEDEDEDD	1	74	0.026323
EEDEDEDD	1	75	0.025274
EEDEDEDD	1	76	0.023177
EEDEDEDD	1	77	0.026323
EEDEDEDD	1	78	0.022129
EEDEDEDD	1	79	0.032613
EEDEDEDD	1	80	0.033661
EEDEDEDD	1	81	0.033661
EEDEDEDD	1	82	0.030516
EEDEDEDD	1	83	0.033661
EEDEDEDD	1	84	0.029468
EEDEDEDD	1	85	0.030516
EEDEDEDD	1	86	0.028419
EEDEDEDD	1	87	0.028419
EEDEDEDD	1	88	0.027371
EEDEDEDD	1	89	0.024226
EEDEDEDD	1	90	0.023177
EEDEDEDD	1	91	0.029468
EEDEDEDD	1	92	0.030516
EEDEDEDD	1	93	0.033661
EEDEDEDD	1	94	0.032613
EEDEDEDD	1	95	0.029468
EEDEDEDD	1	96	0.026323
EEDEDEDD	1	97	0.026323
EEDEDEDD	1	98	0.027371
EEDEDEDD	1	99	0.027371
EEDEDEDD	1	100	0.022129
EEDEDEDD	1	101	0.020032
EEDEDEDD	1	102	0.020032
EEDEDEDD	1	103	0.030516
EEDEDEDD	1	104	0.027371
EEDEDEDD	1	105	0.026323
EEDEDEDD	1	106	0.021081
EEDEDEDD	1	107	0.035758
EEDEDEDD	1	108	0.026323
EEDEDEDD	1	109	0.021081
EEDEDEDD	1	110	0.035758
EEDEDEDD	1	111	0.026323
EEDEDEDD	1	112	0.021081
EEDEDEDD	1	113	0.035758
EEDEDEDD	1	114	0.026323
EEDEDEDD	2	1	-0.0059758
EEDEDEDD	2	2	-0.0083939
EEDEDEDD	2	3	-0.0051697
EEDEDEDD	2	4	-0.0075879
EEDEDEDD	2	5	-0.0075879
EEDEDEDD	2	6	-0.0035576
EEDEDEDD	2	7	-0.0083939
EEDEDEDD	2	8	-0.0083939
EEDEDEDD	2	9	-0.0067818
EEDEDEDD	2	10	-0.0051697
EEDEDEDD	2	11	-0.0067818
EEDEDEDD	2	12	-0.0075879
EEDEDEDD	2	13	-0.0043636
EEDEDEDD	2	14	0.0028909
EEDEDEDD	2	15	-0.0019455
EEDEDEDD	2	16	-0.010812
EEDEDEDD	2	17	-0.010812
EEDEDEDD	2	18	-0.010812
EEDEDEDD	2	19	-0.010812
EEDEDEDD	2	20	-0.0092
EEDEDEDD	2	21	-0.0083939
EEDEDEDD	2	22	-0.010812
EEDEDEDD	2	23	-0.010006
EEDEDEDD	2	24	-0.01323
EEDEDEDD	2	25	-0.0075879
EEDEDEDD	2	26	-0.010006
EEDEDEDD	2	27	-0.010812
EEDEDEDD	2	28	-0.010006
EEDEDEDD	2	29	-0.0092
EEDEDEDD	2	30	-0.0092
EEDEDEDD	2	31	-0.010006
EEDEDEDD	2	32	-0.010812
EEDEDEDD	2	33	-0.011618
EEDEDEDD	2	34	-0.0067818
EEDEDEDD	2	35	-0.011618
EEDEDEDD	2	36	-0.0075879
EEDEDEDD	2	37	-0.0067818
EEDEDEDD	2	38	-0.010006
EEDEDEDD	2	39	-0.0075879
EEDEDEDD	2	40	-0.010812
EEDEDEDD	2	41	-0.0092
EEDEDEDD	2	42	-0.010812
EEDEDEDD	2	43	-0.0092
EEDEDEDD	2	44	-0.010006
EEDEDEDD	2	45	-0.012424
EEDEDEDD	2	46	-0.012424
EEDEDEDD	2	47	-0.01323
EEDEDEDD	2	48	-0.01323
EEDEDEDD	2	49	0.0174
EEDEDEDD	2	50	0.020624
EEDEDEDD	2	51	0.014982
EEDEDEDD	3	1	-0.019446
EEDEDEDD	3	2	-0.020895
EEDEDEDD	3	3	-0.020171
EEDEDEDD	3	4	-0.019446
EEDEDEDD	3	5	-0.022344
EEDEDEDD	3	6	-0.020895
EEDEDEDD	3	7	-0.020895
EEDEDEDD	3	8	-0.020171
EEDEDEDD	3	9	-0.020171
EEDEDEDD	3	10	-0.020171
EEDEDEDD	3	11	-0.02162
EEDEDEDD	3	12	-0.020171
EEDEDEDD	3	13	-0.020171
EEDEDEDD	3	14	-0.020171
EEDEDEDD	3	15	-0.019446
EEDEDEDD	3	16	-0.023069
EEDEDEDD	3	17	-0.023069
EEDEDEDD	3	18	-0.024518
EEDEDEDD	3	19	-0.023793
EEDEDEDD	3	20	-0.024518
EEDEDEDD	3	21	-0.023793
EEDEDEDD	3	22	-0.024518
EEDEDEDD	3	23	-0.024518
EEDEDEDD	3	24	-0.025967
EEDEDEDD	3	25	-0.024518
EEDEDEDD	3	26	-0.024518
EEDEDEDD	3	27	-0.023793
EEDEDEDD	3	28	-0.024518
EEDEDEDD	3	29	-0.025242
EEDEDEDD	3	30	-0.024518
EEDEDEDD	3	31	0.0233
EEDEDEDD	3	32	0.020402
EEDEDEDD	3	33	0.012433
EEDEDEDD	4	1	-0.02877
EEDEDEDD	4	2	-0.030755
EEDEDEDD	4	3	-0.030094
EEDEDEDD	4	4	-0.030094
EEDEDEDD	4	5	-0.030094
EEDEDEDD	4	6	-0.032079
EEDEDEDD	4	7	-0.031417
EEDEDEDD	4	8	-0.030755
EEDEDEDD	4	9	-0.030755
EEDEDEDD	4	10	0.085734
EEDEDEDD	4	11	0.077129
EEDEDEDD	4	12	0.067863
EEDEDEDD	5	1	-0.020724
EEDEDEDD	5	2	-0.030572
EEDEDEDD	5	3	-0.025976
EEDEDEDD	5	4	-0.025976
EEDEDEDD	5	5	-0.022037
EEDEDEDD	5	6	-0.030572
EEDEDEDD	5	7	0.047551
EEDEDEDD	5	8	0.052147
EEDEDEDD	5	9	0.074468
EEDEDEDD	6	1	0.055578
EEDEDEDD	6	2	0.055578
EEDEDEDD	6	3	0.056134
EEDEDEDD	7	1	0.029678
EEDEDEDD	7	2	0.039755
EEDEDEDD	7	3	0.039755
EEDEDEDD	8	1	0.054463
EEDEDEDD	8	2	0.045227
EEDEDEDD	8	3	0.052
EEDEDDED	1	1	0.03
EEDEDDED	1	2	0.045
EEDEDDED	1	3	0.025
EEDEDDED	1	4	0.028
EEDEDDED	1	5	0.031
EEDEDDED	1	6	0.029
EEDEDDED	1	7	0.028
EEDEDDED	1	8	0.024
EEDEDDED	1	9	0.026
EEDEDDED	1	10	0.029
EEDEDDED	1	11	0.027
EEDEDDED	1	12	0.033
EEDEDDED	1	13	0.033
EEDEDDED	1	14	0.028
EEDEDDED	1	15	0.029
EEDEDDED	1	16	0.024
EEDEDDED	1	17	0.03
EEDEDDED	1	18	0.028
EEDEDDED	1	19	0.026
EEDEDDED	1	20	0.032
EEDEDDED	1	21	0.025
EEDEDDED	1	22	0.029
EEDEDDED	1	23	0.032
EEDEDDED	1	24	0.029
EEDEDDED	1	25	0.032
EEDEDDED	1	26	0.03
EEDEDDED	1	27	0.033
EEDEDDED	1	28	0.026
EEDEDDED	1	29	0.027
EEDEDDED	1	30	0.038
EEDEDDED	1	31	0.03
EEDEDDED	1	32	0.03
EEDEDDED	1	33	0.034
EEDEDDED	1	34	0.03
EEDEDDED	1	35	0.033
EEDEDDED	1	36	0.035
EEDEDDED	1	37	0.027
EEDEDDED	1	38	0.031
EEDEDDED	1	39	0.032
EEDEDDED	1	40	0.025
EEDEDDED	1	41	0.023
EEDEDDED	1	42	0.028
EEDEDDED	1	43	0.023
EEDEDDED	1	44	0.03
EEDEDDED	1	45	0.027
EEDEDDED	1	46	0.03
EEDEDDED	1	47	0.028
EEDEDDED	1	48	0.028
EEDEDDED	1	49	0.03
EEDEDDED	1	50	0.026
EEDEDDED	1	51	0.03
EEDEDDED	1	52	0.03
EEDEDDED	1	53	0.022
EEDEDDED	1	54	0.028
EEDEDDED	1	55	0.029
EEDEDDED	1	56	0.031
EEDEDDED	1	57	0.035
EEDEDDED	1	58	0.028
EEDEDDED	1	59	0.025
EEDEDDED	1	60	0.025
EEDEDDED	1	61	0.027
EEDEDDED	1	62	0.029
EEDEDDED	1	63	0.029
EEDEDDED	1	64	0.025
EEDEDDED	1	65	0.027
EEDEDDED	1	66	0.026
EEDEDDED	1	67	0.023
EEDEDDED	1	68	0.024
EEDEDDED	1	69	0.031
EEDEDDED	1	70	0.022
EEDEDDED	1	71	0.021
EEDEDDED	1	72	0.021
EEDEDDED	1	73	0.018
EEDEDDED	1	74	0.021
EEDEDDED	1	75	0.02
EEDEDDED	1	76	0.018
EEDEDDED	1	77	0.021
EEDEDDED	1	78	0.017
EEDEDDED	1	79	0.027
EEDEDDED	1	80	0.028
EEDEDDED	1	81	0.028
EEDEDDED	1	82	0.025
EEDEDDED	1	83	0.028
EEDEDDED	1	84	0.024
EEDEDDED	1	85	0.025
EEDEDDED	1	86	0.023
EEDEDDED	1	87	0.023
EEDEDDED	1	88	0.022
EEDEDDED	1	89	0.019
EEDEDDED	1	90	0.018
EEDEDDED	1	91	0.024
EEDEDDED	1	92	0.025
EEDEDDED	1	93	0.028
EEDEDDED	1	94	0.027
EEDEDDED	1	95	0.024
EEDEDDED	1	96	0.021
EEDEDDED	1	97	0.021
EEDEDDED	1	98	0.022
EEDEDDED	1	99	0.022
EEDEDDED	1	100	0.017
EEDEDDED	1	101	0.015
EEDEDDED	1	102	0.015
EEDEDDED	1	103	0.025
EEDEDDED	1	104	0.022
EEDEDDED	1	105	0.021
EEDEDDED	1	106	0.016
EEDEDDED	1	107	0.03
EEDEDDED	1	108	0.021
EEDEDDED	1	109	0.016
EEDEDDED	1	110	0.03
EEDEDDED	1	111	0.021
EEDEDDED	1	112	0.016
EEDEDDED	1	113	0.03
EEDEDDED	1	114	0.021
EEDEDDED	2	1	0.014
EEDEDDED	2	2	0.011
EEDEDDED	2	3	0.015
EEDEDDED	2	4	0.012
EEDEDDED	2	5	0.012
EEDEDDED	2	6	0.017
EEDEDDED	2	7	0.011
EEDEDDED	2	8	0.011
EEDEDDED	2	9	0.013
EEDEDDED	2	10	0.015
EEDEDDED	2	11	0.013
EEDEDDED	2	12	0.012
EEDEDDED	2	13	0.016
EEDEDDED	2	14	0.025
EEDEDDED	2	15	0.019
EEDEDDED	2	16	0.008
EEDEDDED	2	17	0.008
EEDEDDED	2	18	0.008
EEDEDDED	2	19	0.008
EEDEDDED	2	20	0.01
EEDEDDED	2	21	0.011
EEDEDDED	2	22	0.008
EEDEDDED	2	23	0.009
EEDEDDED	2	24	0.005
EEDEDDED	2	25	0.012
EEDEDDED	2	26	0.009
EEDEDDED	2	27	0.008
EEDEDDED	2	28	0.009
EEDEDDED	2	29	0.01
EEDEDDED	2	30	0.01
EEDEDDED	2	31	0.009
EEDEDDED	2	32	0.008
EEDEDDED	2	33	0.007
EEDEDDED	2	34	0.013
EEDEDDED	2	35	0.007
EEDEDDED	2	36	0.012
EEDEDDED	2	37	0.013
EEDEDDED	2	38	0.009
EEDEDDED	2	39	0.012
EEDEDDED	2	40	0.008
EEDEDDED	2	41	0.01
EEDEDDED	2	42	0.008
EEDEDDED	2	43	0.01
EEDEDDED	2	44	0.009
EEDEDDED	2	45	0.006
EEDEDDED	2	46	0.006
EEDEDDED	2	47	0.005
EEDEDDED	2	48	0.005
EEDEDDED	2	49	0.043
EEDEDDED	2	50	0.047
EEDEDDED	2	51	0.04
EEDEDDED	3	1	0.007
EEDEDDED	3	2	0.005
EEDEDDED	3	3	0.006
EEDEDDED	3	4	0.007
EEDEDDED	3	5	0.003
EEDEDDED	3	6	0.005
EEDEDDED	3	7	0.005
EEDEDDED	3	8	0.006
EEDEDDED	3	9	0.006
EEDEDDED	3	10	0.006
EEDEDDED	3	11	0.004
EEDEDDED	3	12	0.006
EEDEDDED	3	13	0.006
EEDEDDED	3	14	0.006
EEDEDDED	3	15	0.007
EEDEDDED	3	16	0.002
EEDEDDED	3	17	0.002
EEDEDDED	3	18	0
EEDEDDED	3	19	0.001
EEDEDDED	3	20	0
EEDEDDED	3	21	0.001
EEDEDDED	3	22	0
EEDEDDED	3	23	0
EEDEDDED	3	24	-0.002
EEDEDDED	3	25	0
EEDEDDED	3	26	0
EEDEDDED	3	27	0.001
EEDEDDED	3	28	0
EEDEDDED	3	29	-0.001
EEDEDDED	3	30	0
EEDEDDED	3	31	0.066
EEDEDDED	3	32	0.062
EEDEDDED	3	33	0.051
EEDEDDED	4	1	0.002
EEDEDDED	4	2	-0.001
EEDEDDED	4	3	0
EEDEDDED	4	4	0
EEDEDDED	4	5	0
EEDEDDED	4	6	-0.003
EEDEDDED	4	7	-0.002
EEDEDDED	4	8	-0.001
EEDEDDED	4	9	-0.001
EEDEDDED	4	10	0.175
EEDEDDED	4	11	0.162
EEDEDDED	4	12	0.148
EEDEDDED	5	1	0.015
EEDEDDED	5	2	0
EEDEDDED	5	3	0.007
EEDEDDED	5	4	0.007
EEDEDDED	5	5	0.013
EEDEDDED	5	6	0
EEDEDDED	5	7	0.119
EEDEDDED	5	8	0.126
EEDEDDED	5	9	0.16
EEDEDDED	6	1	0.018
EEDEDDED	6	2	0
EEDEDDED	6	3	0.007
EEDEDDED	6	4	0.011
EEDEDDED	6	5	0.028
EEDEDDED	6	6	0.005
EEDEDDED	7	1	0.042
EEDEDDED	7	2	0.01
EEDEDDED	7	3	0.025
EEDEDDED	8	1	0.078
EEDEDDED	8	2	0.041
EEDEDDED	8	3	0.075
[truncated: 15,052 more rows]

[truncated: 11 more sheets: FigureS11a, FigureS11b, FigureS12a, FigureS12b, FigureS13, FigureS14, FigureS15, FigureS16, FigureS17a, FigureS17b, FigureS18]
